# Supplementary material for: Characterization of chemical components and the potential anti-influenza mechanism of Fructus Arctii by a strategy integrating pharmacological evaluations, chemical profiling, serum pharmacochemistry, and network pharmacology
Source: Royal Society of Chemistry journal article supplement (doi:10.1039/d2nj02799b), 2022-01-01
Supplement: d2nj02799b2.pdf [file d2nj02799b2.pdf]

## Supplementary Material

### Captions

**Figure S1** The lung score of Fructus Arctii in H1N1 infected mice.

**Figure S2** The possible fragmentation pathway for Lappaol E (peak **81**).

**Figure S3** The proposed fragmentation pathway for Lappaol F (peak **105**).

**Figure S4** The proposed fragmentation pathway for Lappaol H (peak **40**).

**Figure S5** The proposed fragmentation pathway for Neoarctin A (peak **116**).

**Figure S6** The possible fragmentation pathway for Diarctigenin (peak **114**).

**Table S1** Chemical constituents isolated from Fructus Arctii.

**Table S2** Compounds identified or tentatively characterized in Fructus Arctii by UHPLC/Q-TOF MS.

**Figure S1** The lung score of Fructus Arctii in H1N1 infected mice.

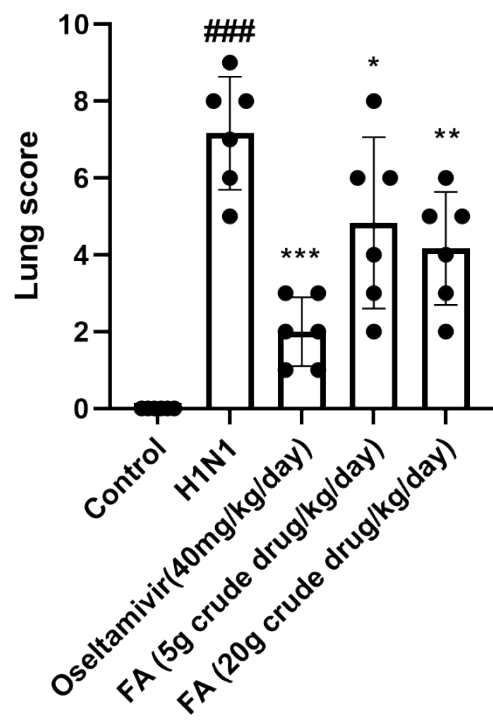

**Figure S2** The possible fragmentation pathway for Lappaol E (peak **81**).

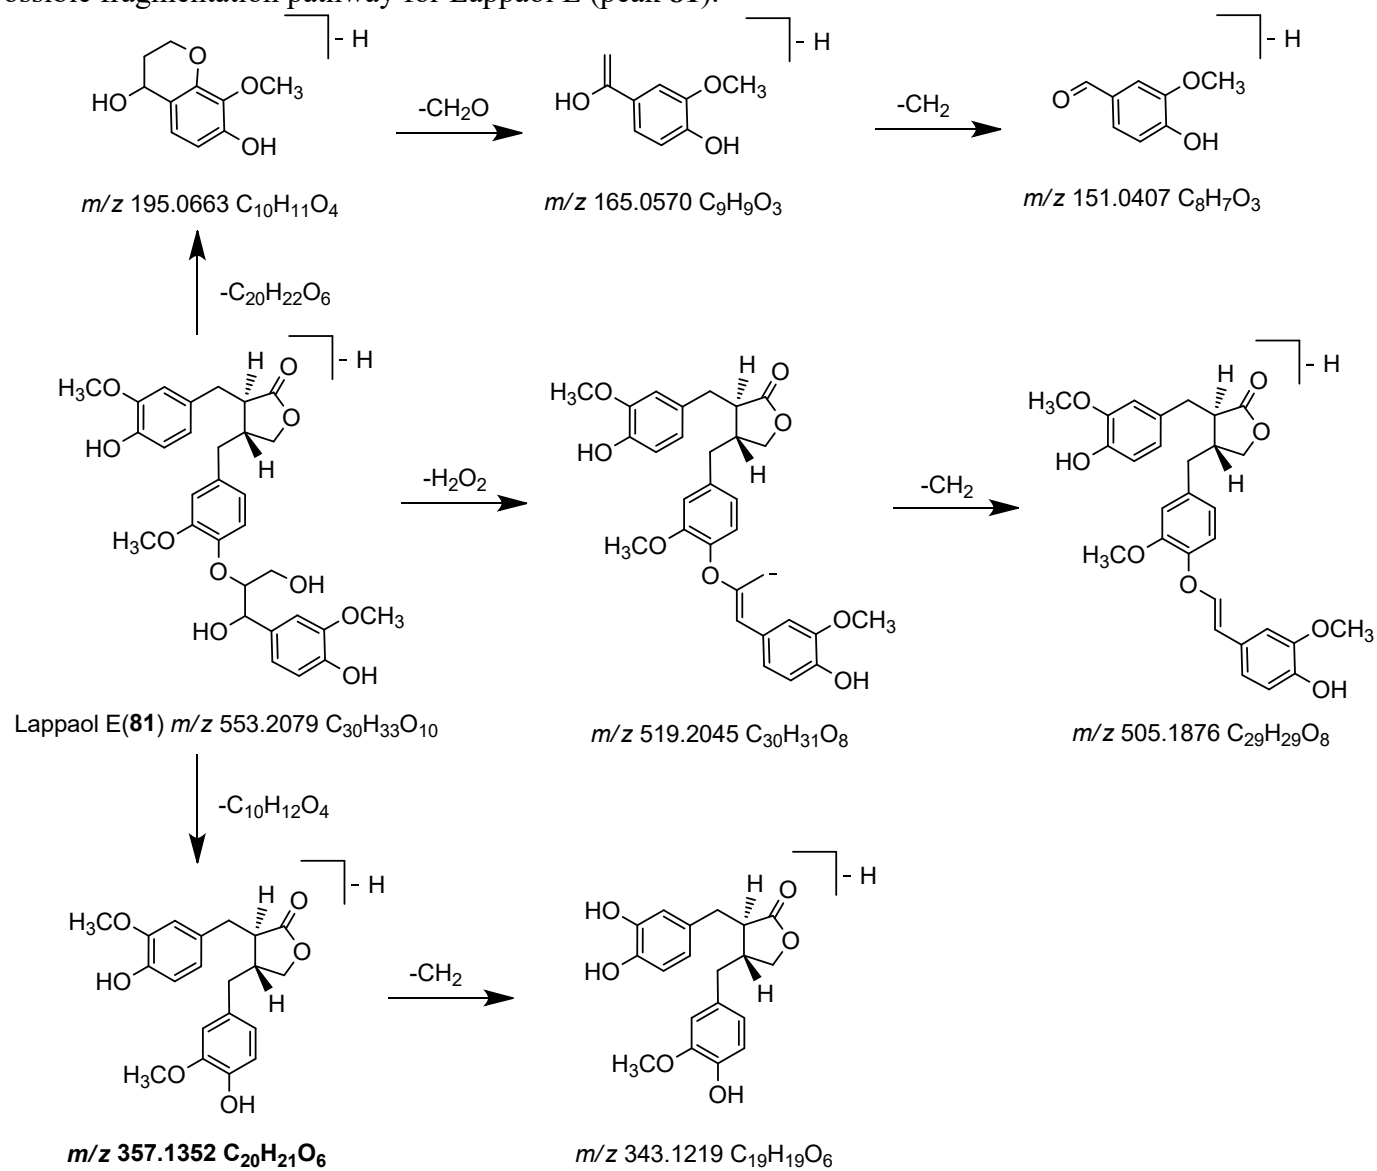

**Figure S3** The proposed fragmentation pathway for Lappaol F (peak 105).

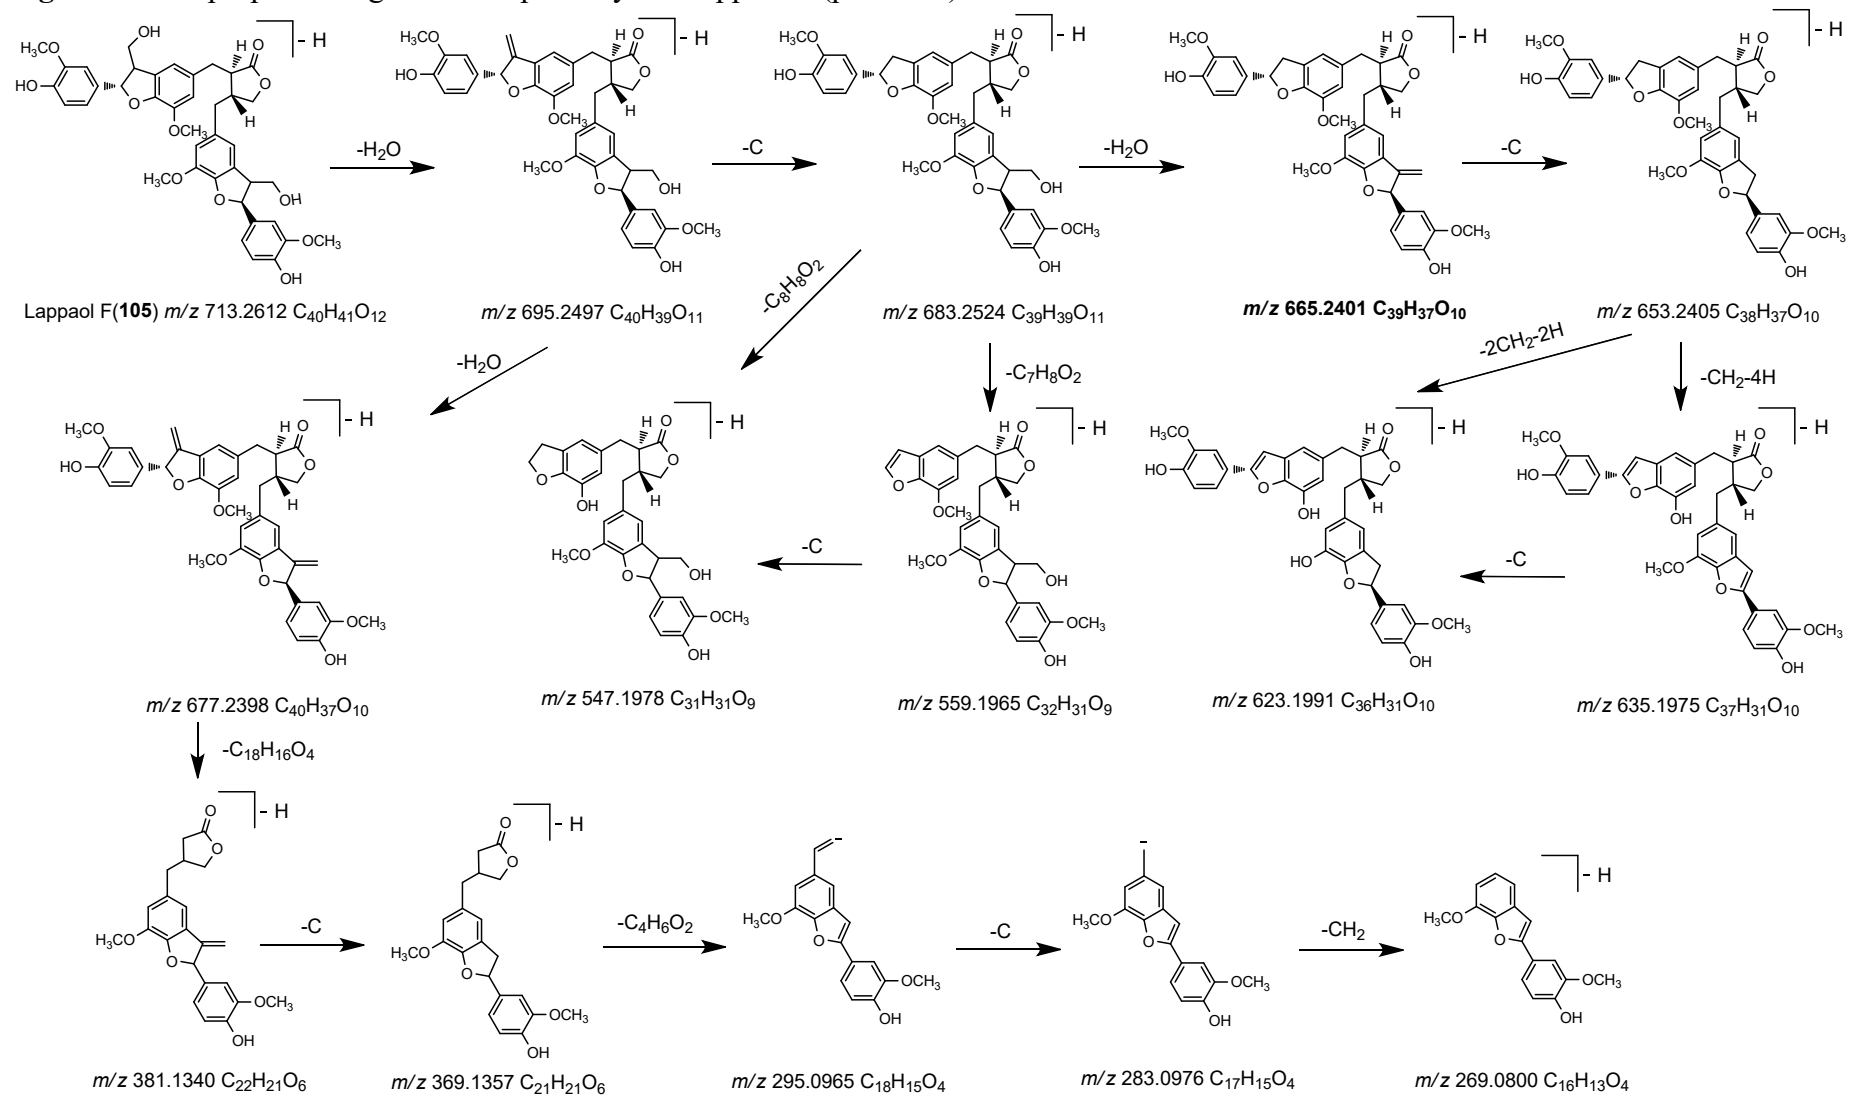

**Figure S4** The proposed fragmentation pathway for Lappaol H (peak 40).

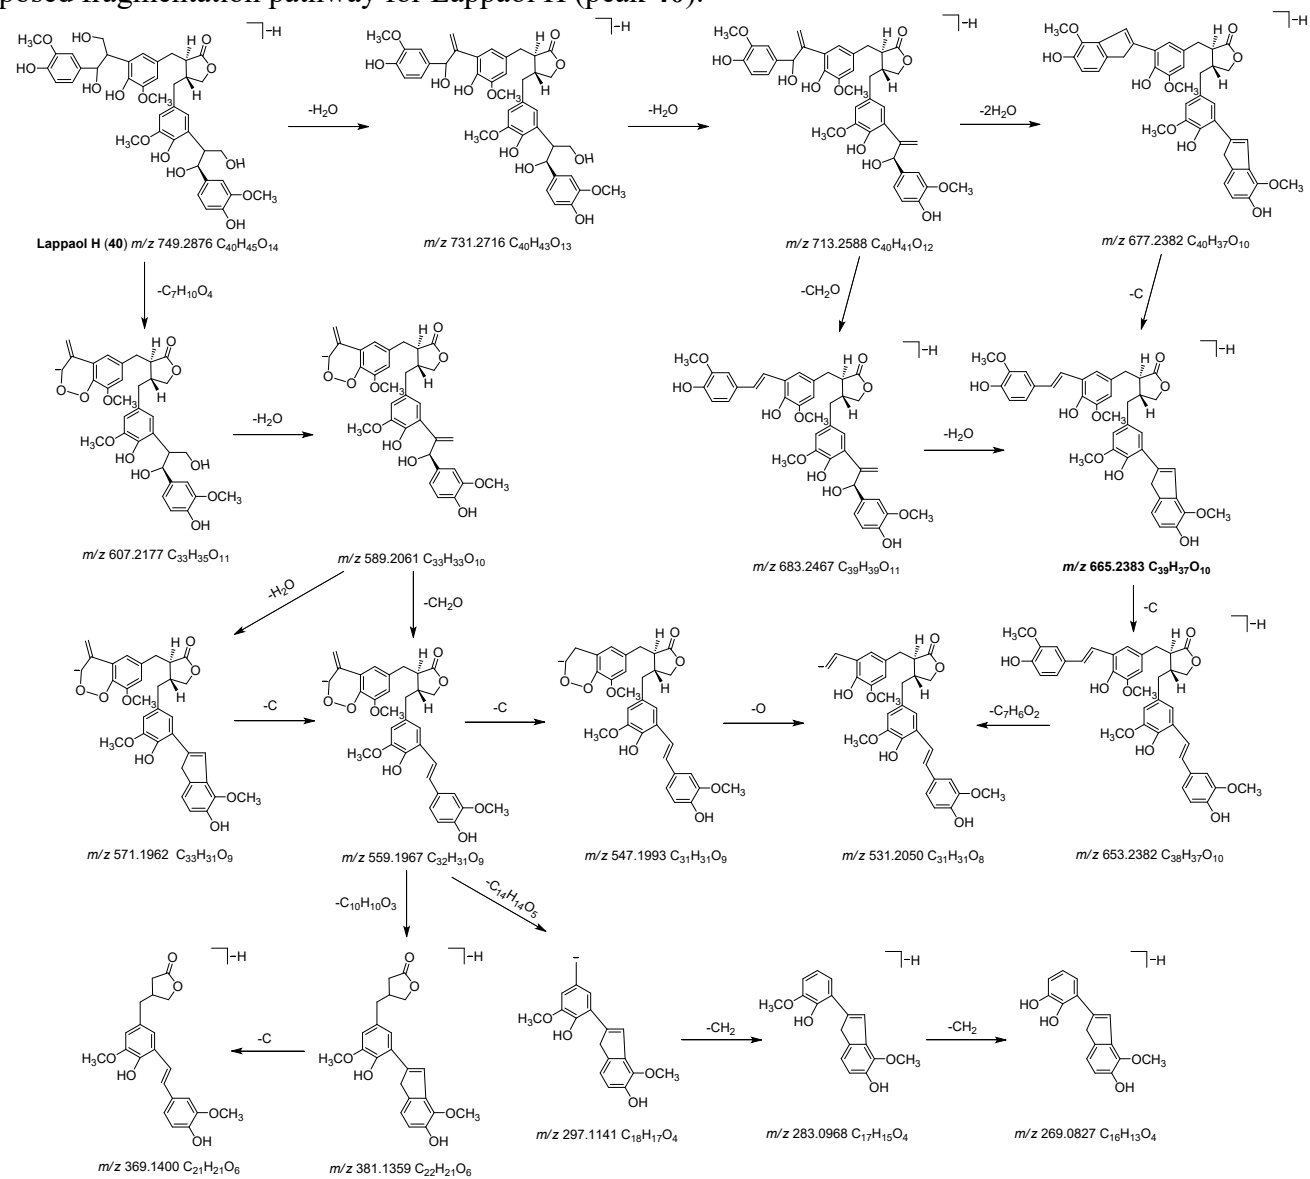

**Figure S5** The proposed fragmentation pathway for Neoarctin A (peak 116).

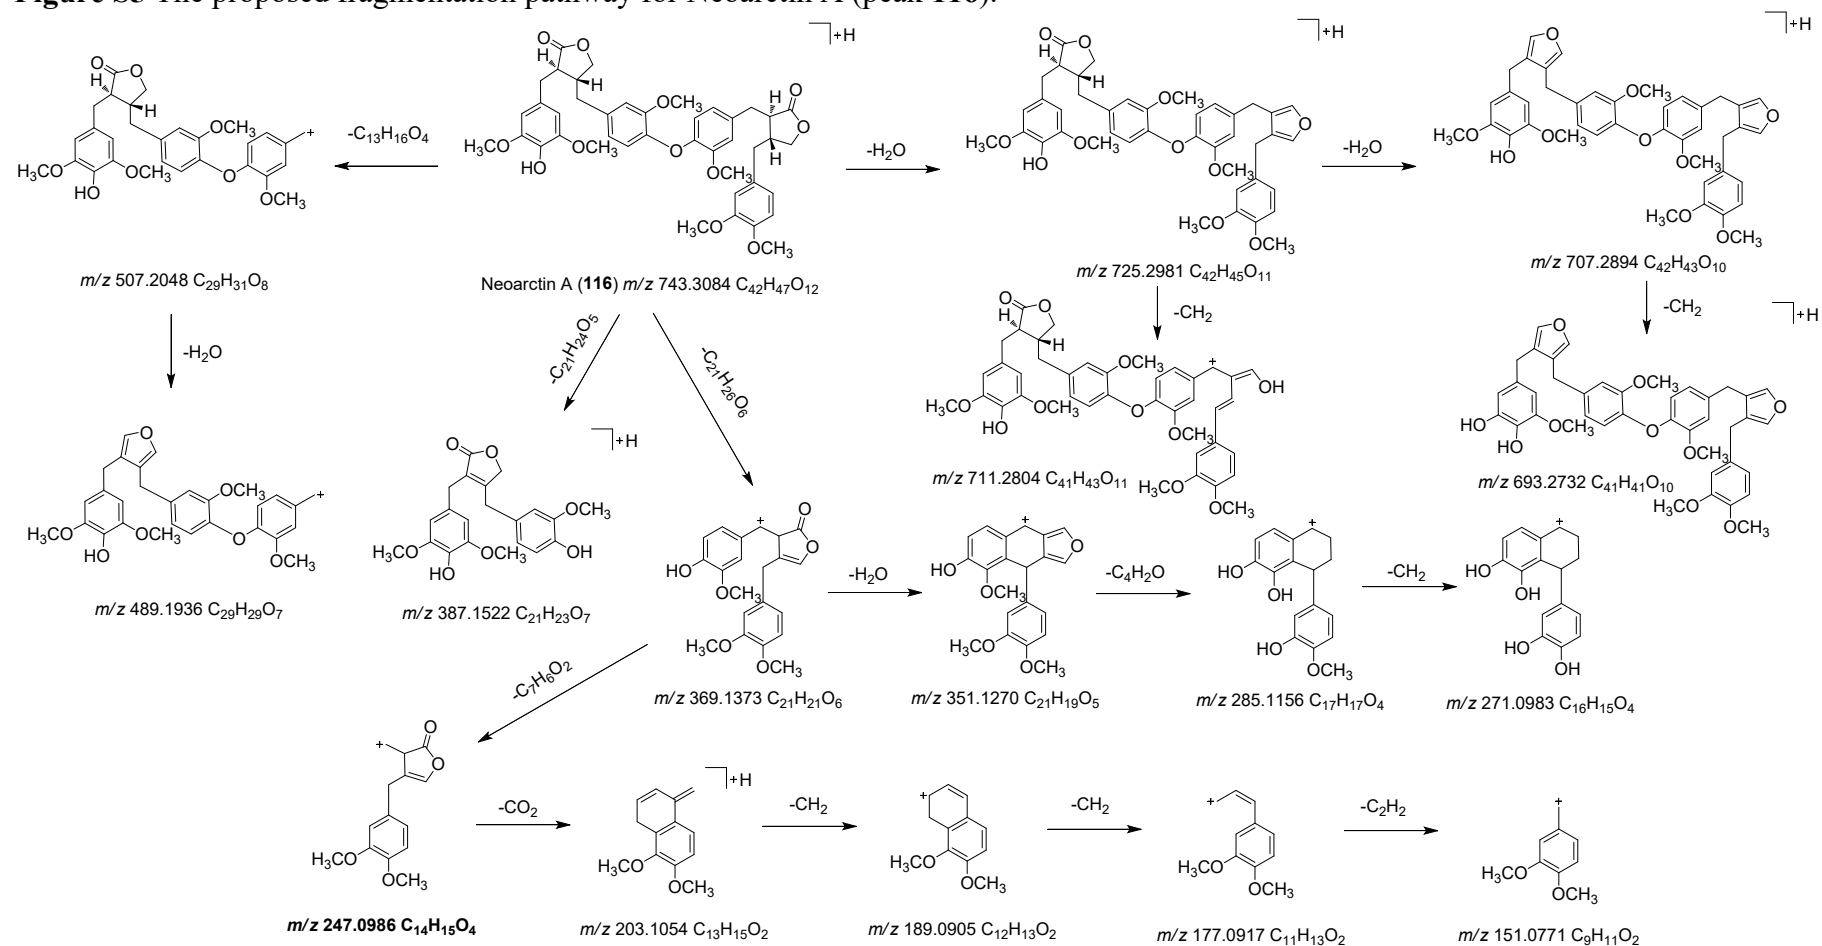

**Figure S6** The possible fragmentation pathway for Diarctigenin (peak 114).

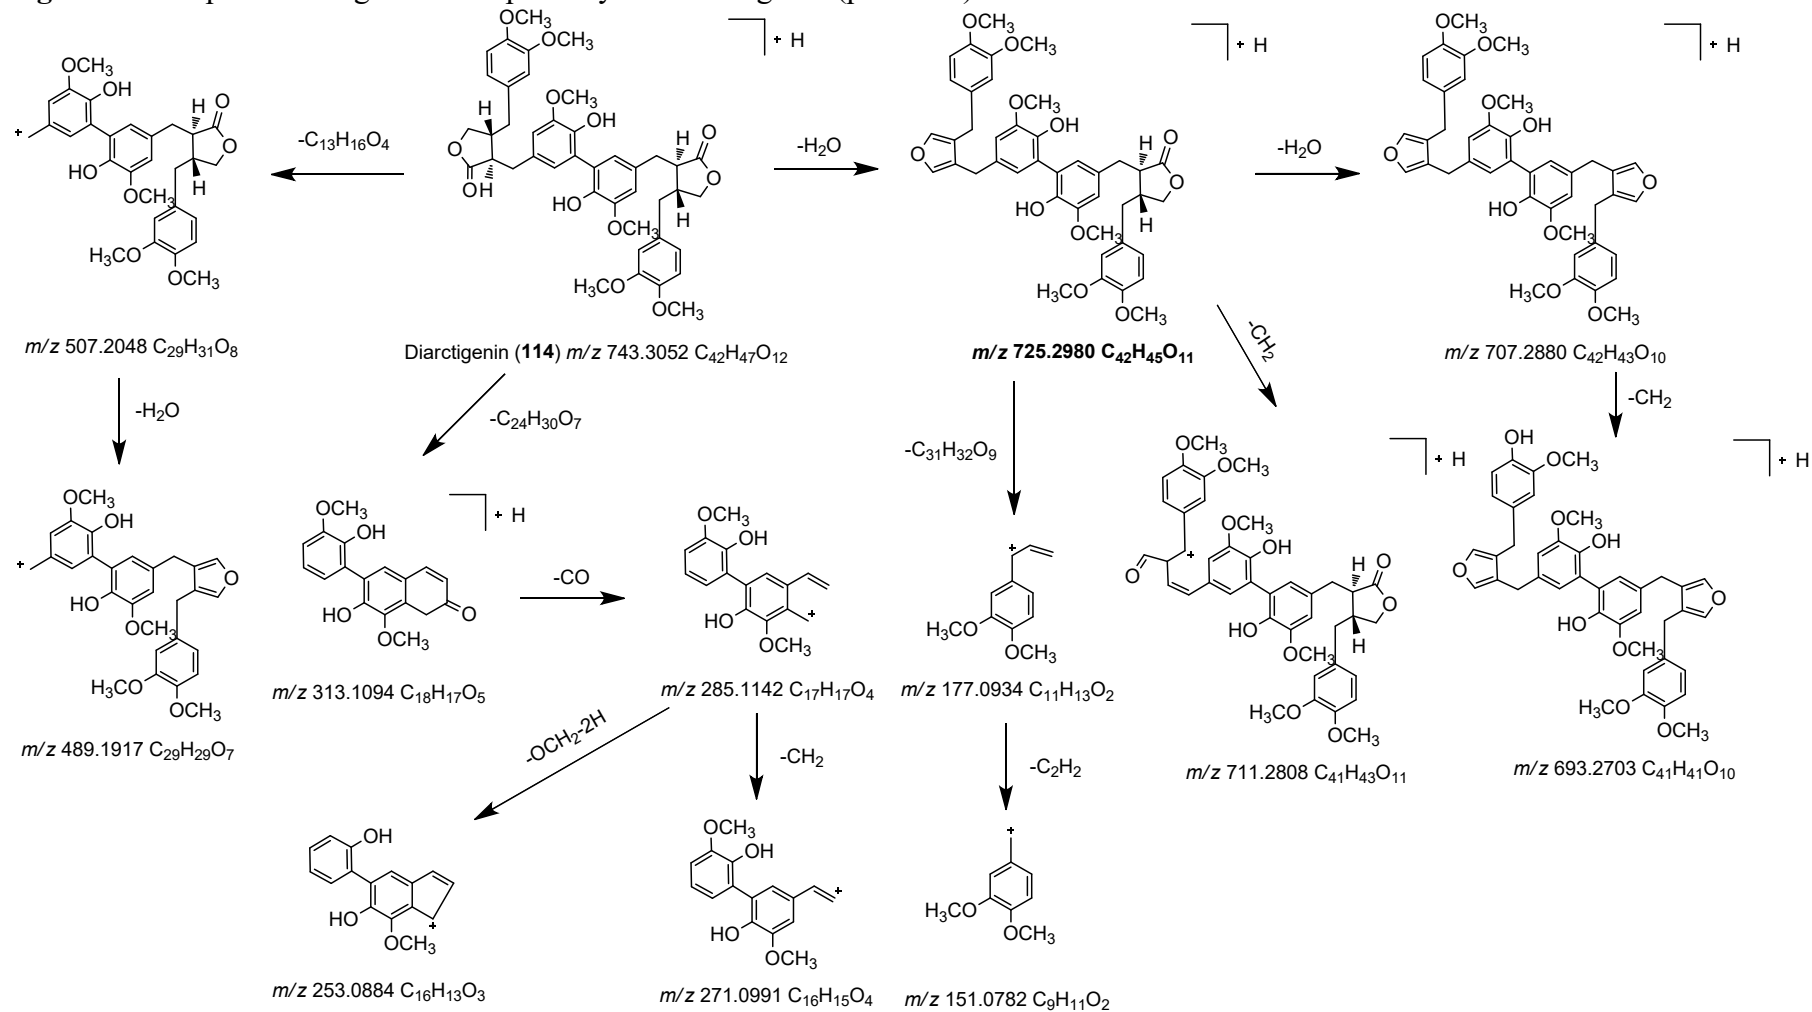

**Table S1** Chemical constituents isolated from Fructus Arctii.

| Types          | Chemical name                                                                                                                                         | Formula                                                       | Molecular weight | reference |
|----------------|-------------------------------------------------------------------------------------------------------------------------------------------------------|---------------------------------------------------------------|------------------|-----------|
| <b>Lignans</b> |                                                                                                                                                       |                                                               |                  |           |
| 1              | diarctigenin                                                                                                                                          | C <sub>42</sub> H <sub>46</sub> O <sub>12</sub>               | 742.2989         | 1         |
| 2              | arctiin                                                                                                                                               | C <sub>27</sub> H <sub>34</sub> O <sub>11</sub>               | 534.2101         | 1         |
| 3              | arctigenin                                                                                                                                            | C <sub>21</sub> H <sub>24</sub> O <sub>6</sub>                | 372.1573         | 1         |
| 4              | 4-acetylatearctiin                                                                                                                                    | C <sub>29</sub> H <sub>36</sub> O <sub>12</sub>               | 576.2207         | 2         |
| 5              | arctigenin-4- <i>O</i> - $\beta$ -D-gentiobioside                                                                                                     | C <sub>33</sub> H <sub>44</sub> O <sub>16</sub>               | 696.2629         | 1         |
| 6              | arctigenin-4- <i>O</i> - $\alpha$ -D-galactopyranosyl-(1 $\rightarrow$ 6)- <i>O</i> - $\beta$ -D-glucopyranoside                                      | C <sub>33</sub> H <sub>44</sub> O <sub>16</sub>               | 696.2629         | 1         |
| 7              | arctigenin-4- <i>O</i> - $\beta$ -D-apiofuranosyl-(1 $\rightarrow$ 6)- <i>O</i> - $\beta$ -D-glucopyranoside                                          | C <sub>32</sub> H <sub>42</sub> O <sub>15</sub>               | 666.2524         | 1         |
| 8              | 3-benzyl-6-(1-hydroxyethyl)-2,5-piperazinedione                                                                                                       | C <sub>13</sub> H <sub>16</sub> N <sub>2</sub> O <sub>3</sub> | 248.1161         | 1         |
| 9              | 3-benzyl-2,5- piperazinedione                                                                                                                         | C <sub>11</sub> H <sub>12</sub> N <sub>2</sub> O <sub>2</sub> | 204.0899         | 1         |
| 10             | 5'-propanediolmatairesinoid                                                                                                                           | C <sub>29</sub> H <sub>38</sub> O <sub>13</sub>               | 594.2312         | 1         |
| 11             | (7 <i>R</i> ,8 <i>R</i> ,8' <i>R</i> )-rafanotrachelogenin-4- <i>O</i> - $\beta$ -D-glucopyranoside                                                   | C <sub>27</sub> H <sub>34</sub> O <sub>12</sub>               | 550.2050         | 1         |
| 12             | (7' <i>S</i> ,8 <i>R</i> ,8' <i>R</i> )-rafanotrachelogenin-4- <i>O</i> - $\beta$ -D-glucopyranoside                                                  | C <sub>27</sub> H <sub>34</sub> O <sub>12</sub>               | 550.2050         | 1         |
| 13             | (7 <i>S</i> ,8 <i>S</i> ,8' <i>R</i> )-4,7-dihydroxy-3,3',4'-trimethoxyl-9-oxo-dibenzylbutyrolactone lignan-4- <i>O</i> - $\beta$ -D-glucopyranoside  | C <sub>27</sub> H <sub>34</sub> O <sub>12</sub>               | 550.2050         | 1         |
| 14             | (7 <i>S</i> ,8 <i>S</i> ,8' <i>R</i> )-4,7- dihydroxy-3,3',4'-trimethoxyl-9-oxo-dibenzylbutyrolactone lignan                                          | C <sub>21</sub> H <sub>24</sub> O <sub>7</sub>                | 388.1522         | 1         |
| 15             | (7 <i>R</i> ,8 <i>S</i> ,8' <i>R</i> )-4,7-dihydroxy-3,3',4'-trimethoxyl-9-oxo-dibenzylbutyrolactone lignan-4- <i>O</i> - $\beta$ -D-glucopyranoside  | C <sub>27</sub> H <sub>34</sub> O <sub>12</sub>               | 550.2050         | 1         |
| 16             | (7 <i>R</i> ,8 <i>S</i> ,8' <i>R</i> )-4,7,4'-trihydroxy-3,3'- dimethoxyl-9-oxo-dibenzylbutyrolactone lignan-4- <i>O</i> - $\beta$ -D-glucopyranoside | C <sub>26</sub> H <sub>32</sub> O <sub>12</sub>               | 536.1894         | 1         |
| 17             | 7,8-didehydroarctigenin                                                                                                                               | C <sub>21</sub> H <sub>22</sub> O <sub>6</sub>                | 370.1416         | 1         |
| 18             | arctiidilactone                                                                                                                                       | C <sub>20</sub> H <sub>20</sub> O <sub>8</sub>                | 388.1158         | 1         |
| 19             | arctiapolignan A                                                                                                                                      | C <sub>20</sub> H <sub>28</sub> O <sub>10</sub>               | 428.1682         | 1         |
| 20             | arctiisesquineolignan A                                                                                                                               | C <sub>42</sub> H <sub>52</sub> O <sub>19</sub>               | 860.3103         | 1         |
| 21             | arctiisesquineolignan B                                                                                                                               | C <sub>36</sub> H <sub>46</sub> O <sub>16</sub>               | 734.2786         | 1         |
| 22             | arctiiphenolglycoside A                                                                                                                               | C <sub>19</sub> H <sub>28</sub> O <sub>13</sub>               | 464.1530         | 1         |
| 23             | arctignan A                                                                                                                                           | C <sub>30</sub> H <sub>34</sub> O <sub>10</sub>               | 554.2152         | 1         |
| 24             | arctignan B                                                                                                                                           | C <sub>30</sub> H <sub>32</sub> O <sub>10</sub>               | 552.1995         | 1         |
| 25             | arctignan C                                                                                                                                           | C <sub>30</sub> H <sub>32</sub> O <sub>10</sub>               | 552.1995         | 1         |
| 26             | arctignan D                                                                                                                                           | C <sub>40</sub> H <sub>44</sub> O <sub>13</sub>               | 732.2782         | 1         |
| 27             | arctignan E                                                                                                                                           | C <sub>40</sub> H <sub>44</sub> O <sub>13</sub>               | 732.2782         | 1         |



|    |                                                                                                                                                                                              |                                                 |          |   |
|----|----------------------------------------------------------------------------------------------------------------------------------------------------------------------------------------------|-------------------------------------------------|----------|---|
| 28 | arctignan F                                                                                                                                                                                  | C <sub>40</sub> H <sub>42</sub> O <sub>13</sub> | 730.2625 | 2 |
| 29 | arctignan G                                                                                                                                                                                  | C <sub>40</sub> H <sub>44</sub> O <sub>13</sub> | 732.2782 | 2 |
| 30 | arctignan H                                                                                                                                                                                  | C <sub>40</sub> H <sub>44</sub> O <sub>13</sub> | 732.2782 | 2 |
| 31 | lappaol A                                                                                                                                                                                    | C <sub>30</sub> H <sub>32</sub> O <sub>9</sub>  | 536.2046 | 1 |
| 32 | isolappaol A                                                                                                                                                                                 | C <sub>30</sub> H <sub>32</sub> O <sub>9</sub>  | 536.2046 | 3 |
| 33 | lappaol B                                                                                                                                                                                    | C <sub>31</sub> H <sub>34</sub> O <sub>9</sub>  | 550.2203 | 1 |
| 34 | isolappaol C                                                                                                                                                                                 | C <sub>30</sub> H <sub>34</sub> O <sub>10</sub> | 554.2152 | 1 |
| 35 | lappaol C                                                                                                                                                                                    | C <sub>30</sub> H <sub>34</sub> O <sub>10</sub> | 554.2152 | 1 |
| 36 | lappaol D                                                                                                                                                                                    | C <sub>31</sub> H <sub>36</sub> O <sub>10</sub> | 568.2308 | 1 |
| 37 | lappaol E                                                                                                                                                                                    | C <sub>30</sub> H <sub>34</sub> O <sub>10</sub> | 554.2152 | 1 |
| 38 | lappaol F                                                                                                                                                                                    | C <sub>40</sub> H <sub>42</sub> O <sub>12</sub> | 714.2676 | 1 |
| 39 | lappaol H                                                                                                                                                                                    | C <sub>40</sub> H <sub>46</sub> O <sub>14</sub> | 750.2888 | 1 |
| 40 | neoarctin A                                                                                                                                                                                  | C <sub>42</sub> H <sub>46</sub> O <sub>12</sub> | 742.2989 | 1 |
| 41 | neoarctin B                                                                                                                                                                                  | C <sub>42</sub> H <sub>46</sub> O <sub>12</sub> | 742.2989 | 1 |
| 42 | matairesinoside                                                                                                                                                                              | C <sub>26</sub> H <sub>32</sub> O <sub>11</sub> | 520.1945 | 1 |
| 43 | matairesinol                                                                                                                                                                                 | C <sub>20</sub> H <sub>22</sub> O <sub>6</sub>  | 358.1416 | 1 |
| 44 | matairesinol-4,4'-di- <i>O</i> - $\beta$ -D-glucopyranoside                                                                                                                                  | C <sub>32</sub> H <sub>42</sub> O <sub>16</sub> | 682.2473 | 1 |
| 45 | pinoresinol                                                                                                                                                                                  | C <sub>20</sub> H <sub>22</sub> O <sub>6</sub>  | 358.1416 | 1 |
| 46 | phylligenin                                                                                                                                                                                  | C <sub>21</sub> H <sub>24</sub> O <sub>6</sub>  | 372.1573 | 1 |
| 47 | styraxlignolide E                                                                                                                                                                            | C <sub>26</sub> H <sub>32</sub> O <sub>11</sub> | 520.1945 | 1 |
| 48 | styraxlignolide D                                                                                                                                                                            | C <sub>26</sub> H <sub>32</sub> O <sub>11</sub> | 520.1945 | 1 |
| 49 | syringaresinol                                                                                                                                                                               | C <sub>22</sub> H <sub>26</sub> O <sub>8</sub>  | 418.1628 | 1 |
| 50 | arctiinoside A                                                                                                                                                                               | C <sub>26</sub> H <sub>34</sub> O <sub>13</sub> | 554.1999 | 1 |
| 51 | arctiinoside B                                                                                                                                                                               | C <sub>32</sub> H <sub>42</sub> O <sub>17</sub> | 698.2422 | 1 |
| 52 | (7 <i>S</i> , 8 <i>R</i> )-4,7,9,9'-tetrahydroxy-3,3'-dimethoxy-8- <i>O</i> -4'-neolignan-9'- <i>O</i> - $\beta$ -D-apiofuranosyl-(1 $\rightarrow$ 6)- <i>O</i> - $\beta$ -D-glucopyranoside | C <sub>31</sub> H <sub>44</sub> O <sub>16</sub> | 672.2629 | 1 |
| 53 | (8 <i>R</i> )-4,9,9'-trihydroxy-3,3'-dimethoxy-7-oxo-8- <i>O</i> -4'-neolignan-4- <i>O</i> - $\beta$ -D-glucopyranoside                                                                      | C <sub>26</sub> H <sub>34</sub> O <sub>12</sub> | 538.2050 | 1 |
| 54 | (7 <i>R</i> ,8 <i>S</i> )-dihydrodehydrodiconiferyl alcohol-7'-oxo-4- <i>O</i> - $\beta$ -D-glucopyranoside                                                                                  | C <sub>26</sub> H <sub>32</sub> O <sub>12</sub> | 536.1894 | 1 |
| 55 | (7' <i>S</i> , 8' <i>R</i> ,8 <i>S</i> )-4,4',9'-trihydroxy-3,3'-dimethoxy-7',9'-epoxylignan-7-oxo-4- <i>O</i> - $\beta$ -D-glucopyranoside                                                  | C <sub>26</sub> H <sub>32</sub> O <sub>12</sub> | 536.1894 | 1 |
| 56 | trachelogenin                                                                                                                                                                                | C <sub>21</sub> H <sub>24</sub> O <sub>7</sub>  | 388.1522 | 1 |
| 57 | (7 <i>S</i> ,8 <i>R</i> ,7' <i>S</i> )-Dihydrodehydrodiconiferyl Alcohol-7'-hydroxy-4- <i>O</i> - $\beta$ -D-glucopyranoside                                                                 | C <sub>26</sub> H <sub>34</sub> O <sub>12</sub> | 538.2050 | 4 |
| 58 | (7 <i>R</i> ,8 <i>S</i> ,7' <i>S</i> )-Dihydrodehydrodiconiferyl Alcohol-7'-hydroxy-4- <i>O</i> - $\beta$ -D-glucopyranoside                                                                 | C <sub>26</sub> H <sub>34</sub> O <sub>12</sub> | 538.2050 | 4 |
| 59 | (8 <i>R</i> ,7' <i>S</i> )-4,9,7',9'-Tetrahydroxy-3,3'-dimethoxy-7-oxo-8-4'-oxyneolignan-4- <i>O</i> - $\beta$ -D-glucopyranoside                                                            | C <sub>26</sub> H <sub>34</sub> O <sub>13</sub> | 554.1999 | 4 |

|                                                      |                                                                                                                                                         |                                                 |          |   |
|------------------------------------------------------|---------------------------------------------------------------------------------------------------------------------------------------------------------|-------------------------------------------------|----------|---|
| 60                                                   | (8 <i>S</i> ,7' <i>S</i> )-4,9,7',9'-Tetrahydroxy-3,3'-dimethoxyl-7-oxo-8-4'-oxyneolignan-4- <i>O</i> - $\beta$ -D-glucopyranoside                      | C <sub>26</sub> H <sub>34</sub> O <sub>13</sub> | 554.1999 | 4 |
| 61                                                   | (8 <i>R</i> ,7' <i>R</i> ,8' <i>R</i> )-4,4',7'-Trihydroxy-3,3'-dimethoxyl-9-oxo Dibenzylybutyrolactone Lignan-4- <i>O</i> - $\beta$ -D-glucopyranoside | C <sub>26</sub> H <sub>32</sub> O <sub>12</sub> | 536.1894 | 4 |
| 62                                                   | (8 <i>R</i> ,7' <i>S</i> ,8' <i>R</i> )-4,4',7'-Trihydroxy-3,3'-dimethoxyl-9-oxo Dibenzylybutyrolactone Lignan-4- <i>O</i> - $\beta$ -D-glucopyranoside | C <sub>26</sub> H <sub>32</sub> O <sub>12</sub> | 536.1894 | 4 |
| 63                                                   | (7 <i>R</i> ,8 <i>S</i> ,7' <i>S</i> ,8' <i>R</i> )-4,9,4',7'-Tetrahydroxy-3,3'-dimethoxy-7,9'-epoxylignan-4'- <i>O</i> - $\beta$ -D-glucopyranoside    | C <sub>26</sub> H <sub>34</sub> O <sub>12</sub> | 538.2050 | 4 |
| 64                                                   | (7 <i>S</i> ,8 <i>R</i> ,7' <i>R</i> ,8' <i>S</i> )-4,9,4',7'-Tetrahydroxy-3,3'-dimethoxy-7,9'-epoxylignan-4'- <i>O</i> - $\beta$ -D-glucopyranoside    | C <sub>26</sub> H <sub>34</sub> O <sub>12</sub> | 538.2050 | 4 |
| 65                                                   | (7 <i>S</i> ,8 <i>R</i> ,7' <i>S</i> ,8' <i>S</i> )-4,9,4',7'-Tetrahydroxy-3,3'-dimethoxy-7,9'-epoxylignan-4'- <i>O</i> - $\beta$ -D-glucopyranoside    | C <sub>26</sub> H <sub>34</sub> O <sub>12</sub> | 538.2050 | 4 |
| 66                                                   | (7 <i>S</i> ,8 <i>R</i> ,7' <i>R</i> ,8' <i>S</i> )-4,9,4',7'-Tetrahydroxy-3,3'-dimethoxy-7,9'-epoxylignan-4- <i>O</i> - $\beta$ -D-glucopyranoside     | C <sub>26</sub> H <sub>34</sub> O <sub>12</sub> | 538.2050 | 4 |
| 67                                                   | (7 <i>R</i> ,8 <i>S</i> )-7,9,9'-trihydroxy-3,3'-dimethoxy-8- <i>O</i> -4'-neolignan-4- <i>O</i> - $\beta$ -D-glucopyranoside                           | C <sub>26</sub> H <sub>36</sub> O <sub>12</sub> | 540.2207 | 4 |
| 68                                                   | (7 <i>S</i> ,8 <i>R</i> )-7,9,9'-trihydroxy-3,3'-dimethoxy-8- <i>O</i> -4'-neolignan-4- <i>O</i> - $\beta$ -D-glucopyranoside                           | C <sub>26</sub> H <sub>36</sub> O <sub>12</sub> | 540.2207 | 4 |
| 69                                                   | (7 <i>R</i> ,8 <i>R</i> )-7,9,9'-trihydroxy-3,3'-dimethoxy-8- <i>O</i> -4'-neolignan-4- <i>O</i> - $\beta$ -D-glucopyranoside                           | C <sub>26</sub> H <sub>36</sub> O <sub>12</sub> | 540.2207 | 4 |
| 70                                                   | (7 <i>S</i> ,8 <i>S</i> )-7,9,9'-trihydroxy-3,3'-dimethoxy-8- <i>O</i> -4'-neolignan-4- <i>O</i> - $\beta$ -D-glucopyranoside                           | C <sub>26</sub> H <sub>36</sub> O <sub>12</sub> | 540.2207 | 4 |
| 71                                                   | (7 <i>R</i> ,7' <i>R</i> ,8 <i>S</i> ,8' <i>S</i> )-(+)-neo-olivil-4- <i>O</i> - $\beta$ -D-glucopyranoside                                             | C <sub>26</sub> H <sub>34</sub> O <sub>12</sub> | 538.2050 | 4 |
| 72                                                   | Reported compound 1                                                                                                                                     | C <sub>40</sub> H <sub>46</sub> O <sub>13</sub> | 734.2938 | 5 |
| 73                                                   | Reported compound 2                                                                                                                                     | C <sub>40</sub> H <sub>42</sub> O <sub>12</sub> | 714.2676 | 5 |
| 74                                                   | Reported compound 3                                                                                                                                     | C <sub>30</sub> H <sub>34</sub> O <sub>11</sub> | 570.2101 | 5 |
| 75                                                   | (+)-Diasyringaresinol                                                                                                                                   | C <sub>22</sub> H <sub>26</sub> O <sub>8</sub>  | 418.1628 | 6 |
| 76                                                   | Tanegool                                                                                                                                                | C <sub>20</sub> H <sub>24</sub> O <sub>7</sub>  | 376.1522 | 6 |
| 77                                                   | Reported compound 4                                                                                                                                     | C <sub>28</sub> H <sub>30</sub> O <sub>9</sub>  | 510.1890 | 5 |
| 78                                                   | Arctigenic acid                                                                                                                                         | C <sub>21</sub> H <sub>26</sub> O <sub>7</sub>  | 390.1679 | 7 |
| <b>Carboxylic acids/Quinic acids and derivatives</b> |                                                                                                                                                         |                                                 |          |   |
| 79                                                   | Caffeic acid                                                                                                                                            | C <sub>9</sub> H <sub>8</sub> O <sub>4</sub>    | 180.0423 | 1 |
| 80                                                   | Caffeic acid 4- <i>O</i> -D-glucoside                                                                                                                   | C <sub>15</sub> H <sub>18</sub> O <sub>9</sub>  | 342.0951 | 1 |
| 81                                                   | Chlorogenic acid                                                                                                                                        | C <sub>16</sub> H <sub>18</sub> O <sub>9</sub>  | 354.0951 | 1 |
| 82                                                   | <i>p</i> -coumaric acid                                                                                                                                 | C <sub>9</sub> H <sub>8</sub> O <sub>3</sub>    | 164.0473 | 1 |
| 83                                                   | 3-Coumaroylquinic acid                                                                                                                                  | C <sub>16</sub> H <sub>18</sub> O <sub>8</sub>  | 338.1002 | 1 |
| 84                                                   | 4-Coumaroylquinic acid                                                                                                                                  | C <sub>16</sub> H <sub>18</sub> O <sub>8</sub>  | 338.1002 | 1 |
| 85                                                   | 5-Coumaroylquinic acid                                                                                                                                  | C <sub>16</sub> H <sub>18</sub> O <sub>8</sub>  | 338.1002 | 1 |
| 86                                                   | Benzoic Acid                                                                                                                                            | C <sub>7</sub> H <sub>6</sub> O <sub>2</sub>    | 122.0368 | 1 |
| 87                                                   | Cynarin                                                                                                                                                 | C <sub>25</sub> H <sub>24</sub> O <sub>12</sub> | 516.1268 | 1 |
| 88                                                   | Caffeoyl-hexose-hydroxyphenol                                                                                                                           | C <sub>21</sub> H <sub>22</sub> O <sub>10</sub> | 434.1213 | 1 |

|     |                                                                                      |                                                 |          |   |
|-----|--------------------------------------------------------------------------------------|-------------------------------------------------|----------|---|
| 89  | 1- <i>O</i> -caffeoylquinic acid                                                     | C <sub>16</sub> H <sub>18</sub> O <sub>9</sub>  | 354.0951 | 1 |
| 90  | 4- <i>O</i> -caffeoylquinic acid                                                     | C <sub>16</sub> H <sub>18</sub> O <sub>9</sub>  | 354.0951 | 1 |
| 91  | 5- <i>O</i> -caffeoylquinic acid                                                     | C <sub>16</sub> H <sub>18</sub> O <sub>9</sub>  | 354.0951 | 1 |
| 92  | 1- <i>O</i> -, 5- <i>O</i> -dicaffeoyl-3- <i>O</i> -succinylquinic acid              | C <sub>35</sub> H <sub>40</sub> O <sub>15</sub> | 700.2367 | 1 |
| 93  | 1- <i>O</i> -, 5- <i>O</i> -dicaffeoyl-3- <i>O</i> -succinylquinic acid              | C <sub>29</sub> H <sub>28</sub> O <sub>15</sub> | 616.1428 | 1 |
| 94  | 1- <i>O</i> ,5- <i>O</i> -dicaffeoyl-4- <i>O</i> -succinylquinic acid                | C <sub>29</sub> H <sub>35</sub> O <sub>15</sub> | 623.1976 | 1 |
| 95  | 1- <i>O</i> ,5- <i>O</i> -dicaffeoyl-4- <i>O</i> -succinylquinic acid                | C <sub>29</sub> H <sub>28</sub> O <sub>15</sub> | 616.1428 | 1 |
| 96  | 1- <i>O</i> -,5- <i>O</i> -dicaffeoyl-3- <i>O</i> -4- <i>O</i> -disuccinylquaieniide | C <sub>33</sub> H <sub>39</sub> O <sub>18</sub> | 723.2136 | 1 |
| 97  | 1- <i>O</i> -,5- <i>O</i> -dicaffeoyl-3- <i>O</i> -4- <i>O</i> -disuccinylquaieniide | C <sub>33</sub> H <sub>32</sub> O <sub>18</sub> | 716.1589 | 1 |
| 98  | 1- <i>O</i> -,3,5- <i>O</i> -tricaffeoyl-4- <i>O</i> -succinylquinic acid            | C <sub>38</sub> H <sub>41</sub> O <sub>18</sub> | 785.2293 | 1 |
| 99  | 1- <i>O</i> -,3,5- <i>O</i> -tricaffeoyl-4- <i>O</i> -succinylquinic acid            | C <sub>38</sub> H <sub>34</sub> O <sub>18</sub> | 778.1745 | 1 |
| 100 | 1,3-di- <i>O</i> -caffeoylquinic acid                                                | C <sub>25</sub> H <sub>24</sub> O <sub>12</sub> | 516.1268 | 1 |
| 101 | 1,5-di- <i>O</i> -caffeoylquinic acid                                                | C <sub>25</sub> H <sub>24</sub> O <sub>12</sub> | 516.1268 | 1 |
| 102 | 1,5-di- <i>O</i> -caffeoyl-4- <i>O</i> -maloylquinic acid                            | C <sub>29</sub> H <sub>28</sub> O <sub>16</sub> | 632.1377 | 1 |
| 103 | 1,5-di- <i>O</i> -caffeoyl-3- <i>O</i> -maloylquinic acid                            | C <sub>29</sub> H <sub>28</sub> O <sub>16</sub> | 632.1377 | 1 |
| 104 | 1,3,5-tri- <i>O</i> -caffeoylquinic acid                                             | C <sub>34</sub> H <sub>30</sub> O <sub>15</sub> | 678.1585 | 1 |
| 105 | 1,5-di- <i>O</i> -caffeoyl-3- <i>O</i> -succinoyl-4- <i>O</i> -maloyquinic acid      | C <sub>33</sub> H <sub>32</sub> O <sub>19</sub> | 732.1538 | 1 |
| 106 | 5-sinapoylquinic acid                                                                | C <sub>18</sub> H <sub>22</sub> O <sub>10</sub> | 398.1213 | 1 |
| 107 | 3-sinapoyl-5-caffeoylquinic acid                                                     | C <sub>27</sub> H <sub>28</sub> O <sub>13</sub> | 560.1530 | 1 |
| 108 | 3-sinapoyl-5-caffeoyl-1-methoxyoxaloylquinic acid                                    | C <sub>30</sub> H <sub>30</sub> O <sub>16</sub> | 646.1534 | 1 |
| 109 | 4-sinapoyl-5-caffeoyl-1-methoxyoxaloylquinic acid                                    | C <sub>30</sub> H <sub>30</sub> O <sub>16</sub> | 646.1534 | 1 |
| 110 | 3,4- <i>O</i> -dicaffeoylquinic acid                                                 | C <sub>25</sub> H <sub>24</sub> O <sub>12</sub> | 516.1268 | 1 |
| 111 | 1,4-di- <i>O</i> -caffeoylquinic acid                                                | C <sub>25</sub> H <sub>24</sub> O <sub>12</sub> | 516.1268 | 1 |
| 112 | 3,5-di- <i>O</i> -caffeoylquinic acid                                                | C <sub>25</sub> H <sub>24</sub> O <sub>12</sub> | 516.1268 | 1 |
| 113 | 4,5- <i>O</i> -dicaffeoylquinic acid                                                 | C <sub>25</sub> H <sub>24</sub> O <sub>12</sub> | 516.1268 | 1 |
| 114 | 3,5- <i>O</i> -dicaffeoyl-1-methoxyoxaloylquinic acid                                | C <sub>28</sub> H <sub>26</sub> O <sub>15</sub> | 602.1272 | 1 |
| 115 | 3-feruloyl-5-caffeoylquinic acid                                                     | C <sub>26</sub> H <sub>26</sub> O <sub>13</sub> | 546.1373 | 1 |
| 116 | 4,5-dicaffeoyl-1-methoxyoxaloylquinic acid                                           | C <sub>28</sub> H <sub>26</sub> O <sub>15</sub> | 602.1272 | 1 |
| 117 | 3-sinapoyl-5-caffeoyl-4-methoxyoxaloylquinic acid                                    | C <sub>30</sub> H <sub>30</sub> O <sub>16</sub> | 646.1534 | 1 |
| 118 | 1,4,5-tricaffeoylquinic acid                                                         | C <sub>34</sub> H <sub>30</sub> O <sub>15</sub> | 678.1585 | 1 |
| 119 | 3,4,5-tricaffeoylquinic acid                                                         | C <sub>34</sub> H <sub>30</sub> O <sub>15</sub> | 678.1585 | 1 |
| 120 | 1,4,5-tricaffeoyl-3-methoxyoxaloylquinic acid                                        | C <sub>37</sub> H <sub>32</sub> O <sub>18</sub> | 764.1589 | 1 |
| 121 | 3-succinoyl-4,5-dicaffeoyl                                                           | C <sub>29</sub> H <sub>28</sub> O <sub>15</sub> | 616.1428 | 1 |
| 122 | 1,5-dicaffeoyl-3-succinoylquinic acid                                                | C <sub>29</sub> H <sub>28</sub> O <sub>15</sub> | 616.1428 | 1 |

|                   |                                                                                  |                                                 |          |   |
|-------------------|----------------------------------------------------------------------------------|-------------------------------------------------|----------|---|
| 123               | 1,5-di- <i>O</i> -caffeoyl-4- <i>O</i> -succinoylquinic acid                     | C <sub>29</sub> H <sub>28</sub> O <sub>15</sub> | 616.1428 | 1 |
| 124               | 3,4-dicaffeoyl-5-succinoylquinic acid                                            | C <sub>29</sub> H <sub>28</sub> O <sub>15</sub> | 616.1428 | 1 |
| 125               | 1,3-dicaffeoyl-5-fumaroylquinic acid                                             | C <sub>29</sub> H <sub>26</sub> O <sub>15</sub> | 614.1272 | 1 |
| 126               | 1,5-dicaffeoyl-4-fumaroylquinic acid                                             | C <sub>29</sub> H <sub>26</sub> O <sub>15</sub> | 614.1272 | 1 |
| 127               | 1,5-dicaffeoyl-3-maloylquinic acid                                               | C <sub>29</sub> H <sub>28</sub> O <sub>16</sub> | 632.1377 | 1 |
| 128               | 1,4-di- <i>O</i> -caffeoyl-3- <i>O</i> -maloylquinic acid                        | C <sub>29</sub> H <sub>28</sub> O <sub>16</sub> | 632.1377 | 1 |
| 129               | 1,3-di- <i>O</i> -caffeoyl-4,5-di- <i>O</i> -maloylquinic acid                   | C <sub>33</sub> H <sub>32</sub> O <sub>20</sub> | 748.1487 | 1 |
| 130               | 1,5-dicaffeoyl-4-maloylquinic acid                                               | C <sub>29</sub> H <sub>28</sub> O <sub>16</sub> | 632.1377 | 1 |
| 131               | 1,4-di- <i>O</i> -maloyl-3,5-di- <i>O</i> -caffeoylquinic acid                   | C <sub>33</sub> H <sub>32</sub> O <sub>20</sub> | 748.1487 | 1 |
| 132               | 1,3,5-tricaffeoyl-4-succinoylquinic acid                                         | C <sub>38</sub> H <sub>34</sub> O <sub>18</sub> | 778.1745 | 1 |
| 133               | 1,5-dicaffeoyl-3,4-disuccinoylquinic acid                                        | C <sub>33</sub> H <sub>32</sub> O <sub>18</sub> | 716.1589 | 1 |
| 134               | 1,5-dicaffeoyl-3-fumaroyl-4-succinoylquinic acid                                 | C <sub>33</sub> H <sub>30</sub> O <sub>18</sub> | 714.1432 | 1 |
| 135               | 1-fumaroyl-3,5-dicaffeoyl-4-succinoylquinic acid                                 | C <sub>33</sub> H <sub>30</sub> O <sub>18</sub> | 714.1432 | 1 |
| 136               | 1,5-di- <i>O</i> -caffeoyl-3- <i>O</i> -succinoyl-4- <i>O</i> -maloylquinic acid | C <sub>33</sub> H <sub>32</sub> O <sub>19</sub> | 732.1538 | 1 |
| 137               | Dimaloyl-dicaffeoylquinic acid isomer 1                                          | C <sub>33</sub> H <sub>32</sub> O <sub>20</sub> | 748.1487 | 1 |
| 138               | Succinoyl-tricaffeoylquinic acid isomer                                          | C <sub>38</sub> H <sub>34</sub> O <sub>18</sub> | 778.1745 | 1 |
| 139               | Maloyl-dicaffeoylquinic acid isomer                                              | C <sub>29</sub> H <sub>28</sub> O <sub>15</sub> | 616.1428 | 1 |
| 140               | Dicaffeoyl-succinoylmalonylquinic acid isomer 1                                  | C <sub>33</sub> H <sub>32</sub> O <sub>19</sub> | 732.1538 | 1 |
| 141               | Dicaffeoyl-succinoylmalonylquinic acid isomer 2                                  | C <sub>33</sub> H <sub>32</sub> O <sub>20</sub> | 748.1487 | 1 |
| 142               | Dimaloyl-dicaffeoylquinic acid isomer 2                                          | C <sub>33</sub> H <sub>32</sub> O <sub>20</sub> | 748.1487 | 1 |
| 143               | Dimaloyl-dicaffeoylquinic acid isomer 3                                          | C <sub>33</sub> H <sub>32</sub> O <sub>20</sub> | 748.1487 | 1 |
| 144               | Maloyl-tricaffeoylquinic isomer                                                  | C <sub>28</sub> H <sub>32</sub> O <sub>19</sub> | 672.1538 | 1 |
| 145               | 1,3,5-tri- <i>O</i> -caffeoyl-4- <i>O</i> -maloylquinic Acid                     | C <sub>38</sub> H <sub>34</sub> O <sub>19</sub> | 794.1694 | 1 |
| 146               | 5-hydroxymaltol                                                                  | C <sub>6</sub> H <sub>6</sub> O <sub>4</sub>    | 142.0266 | 1 |
| 147               | Succinic acid                                                                    | C <sub>4</sub> H <sub>6</sub> O <sub>4</sub>    | 118.0266 | 1 |
| <b>Flavonoids</b> |                                                                                  |                                                 |          |   |
| 148               | Baicalin                                                                         | C <sub>21</sub> H <sub>18</sub> O <sub>11</sub> | 446.0849 | 1 |
| 149               | Luteolin                                                                         | C <sub>15</sub> H <sub>10</sub> O <sub>6</sub>  | 286.0477 | 1 |
| 150               | Rutin                                                                            | C <sub>27</sub> H <sub>30</sub> O <sub>16</sub> | 610.1534 | 1 |
| 151               | Quercitrin                                                                       | C <sub>21</sub> H <sub>20</sub> O <sub>11</sub> | 448.1006 | 1 |
| 152               | Quercetin                                                                        | C <sub>15</sub> H <sub>10</sub> O <sub>7</sub>  | 302.0427 | 1 |
| 153               | Quercetin-3- <i>O</i> -glucuronide                                               | C <sub>21</sub> H <sub>18</sub> O <sub>13</sub> | 478.0747 | 1 |
| 154               | Quercetin-3-vicianoside                                                          | C <sub>26</sub> H <sub>28</sub> O <sub>16</sub> | 596.1377 | 1 |
| 155               | Quercetin rhamnoside (Quercitrin)                                                | C <sub>21</sub> H <sub>20</sub> O <sub>11</sub> | 448.1006 | 1 |

|                                    |                                              |                         |           |   |
|------------------------------------|----------------------------------------------|-------------------------|-----------|---|
| 156                                | Quercimeritrin                               | $C_{21}H_{20}O_{12}$    | 464.0955  | 1 |
| 157                                | Isoquercetin                                 | $C_{21}H_{20}O_{12}$    | 464.0955  | 1 |
| 158                                | Astragalin                                   | $C_{21}H_{20}O_{11}$    | 448.1006  | 1 |
| 159                                | Kaempferol 3- <i>O</i> - $\beta$ -rutinoside | $C_{27}H_{30}O_{15}$    | 594.1585  | 1 |
| 160                                | Biachanin A                                  | $C_{16}H_{12}O_5$       | 284.0685  | 1 |
| 161                                | Genestein                                    | $C_{15}H_{10}O_5$       | 270.0528  | 1 |
| 162                                | Nobiletin                                    | $C_{21}H_{22}O_8$       | 402.1315  | 1 |
| 163                                | Tangeretin                                   | $C_{20}H_{20}O_7$       | 372.1209  | 1 |
| 164                                | 8,4'-dimethoxy-6-(2-oxopropyl)-flavone       | $C_{20}H_{18}O_5$       | 338.1154  | 1 |
| 165                                | 8,4'-dimethoxy-6-(3-hydroxypropyl)-flavone   | $C_{20}H_{20}O_5$       | 340.1311  | 1 |
| <b>Terpenes/Terpenoids</b>         |                                              |                         |           |   |
| 166                                | $\beta$ -eudesmol                            | $C_{15}H_{26}O$         | 222.1984  | 1 |
| 167                                | Ursolic acid                                 | $C_{30}H_{48}O_3$       | 456.3603  | 1 |
| 168                                | Oleanolic acid                               | $C_{30}H_{48}O_3$       | 456.3603  | 1 |
| 169                                | Arctiopicrin                                 | $C_{19}H_{26}O_6$       | 350.1729  | 1 |
| 170                                | Onopordopicrin                               | $C_{19}H_{24}O_6$       | 348.1573  | 1 |
| 171                                | Dehydrovomifoliol                            | $C_{13}H_{18}O_3$       | 222.1256  | 1 |
| 172                                | Loliolide                                    | $C_{11}H_{16}O_3$       | 196.1099  | 1 |
| 173                                | Dehydromelitensin-8-(4'-hydroxymethacrylate) | $C_{15}H_{24}O_6$       | 300.1573  | 1 |
| 174                                | Dehydromelitensin                            | $C_{15}H_{20}O_4$       | 264.1362  | 1 |
| 175                                | Melitensin                                   | $C_{15}H_{22}O_4$       | 266.1518  | 1 |
| 176                                | 3 $\alpha$ -acetoxypop-22(29)-ene            | $C_{30}H_{49}O_2$       | 441.3733  | 1 |
| 177                                | 3 $\alpha$ -hydroxylanosta-5,15-diene        | $C_{30}H_{50}O$         | 426.3862  | 1 |
| <b>Saccharides/Polysaccharides</b> |                                              |                         |           |   |
| 178                                | Rhamnogalacturonan                           | $C_{117}H_{178}O_{101}$ | 3198.8792 | 1 |
| 179                                | Arabinan                                     | $C_9H_{13}N_3O_5$       | 243.0855  | 1 |
| 180                                | Arabinogalactan                              | $C_{20}H_{36}O_{14}$    | 500.2105  | 1 |
| 181                                | Galactan                                     | $C_{18}H_{32}O_{16}$    | 504.1690  | 1 |
| 182                                | Cellulose                                    | $C_{64}H_{124}O_{30}$   | 1372.8177 | 1 |
| 183                                | Xyloglucan                                   | $C_{51}H_{86}O_{42}$    | 1370.4594 | 1 |
| 184                                | Galacturonic acid                            | $C_6H_{10}O_7$          | 194.0427  | 1 |
| 185                                | Galacturonic acid                            | $C_6H_{10}O_7$          | 194.0427  | 1 |
| 186                                | Galactose                                    | $C_6H_{12}O_6$          | 180.0634  | 1 |
| 187                                | Glucose                                      | $C_6H_{12}O_6$          | 180.0634  | 1 |

|                    |                           |                      |          |   |
|--------------------|---------------------------|----------------------|----------|---|
| 188                | Mannose                   | $C_6H_{12}O_6$       | 180.0634 | 1 |
| 189                | Sucrose                   | $C_{12}H_{22}O_{11}$ | 342.1162 | 1 |
| 190                | Raffinose                 | $C_{18}H_{32}O_{16}$ | 504.1690 | 1 |
| 191                | Rhamnose                  | $C_6H_{12}O_5$       | 164.0685 | 1 |
| 192                | Arabinose                 | $C_5H_{10}O_5$       | 150.0528 | 1 |
| 193                | Fructose                  | $C_6H_{12}O_6$       | 180.0634 | 1 |
| 194                | Sorbitol                  | $C_6H_{14}O_6$       | 182.0790 | 1 |
| 195                | Mannitol                  | $C_6H_{14}O_6$       | 182.0790 | 1 |
| <b>Sterols</b>     |                           |                      |          |   |
| 196                | $\beta$ -sitosterol       | $C_{29}H_{50}O$      | 414.3862 | 1 |
| 197                | daucosterol               | $C_{35}H_{60}O_6$    | 576.4390 | 1 |
| 198                | Daucosterol               | $C_{35}H_{60}O_6$    | 576.4390 | 1 |
| <b>Fatty acids</b> |                           |                      |          |   |
| 199                | Docosanoic acid           | $C_{22}H_{44}O_2$    | 340.3341 | 1 |
| 200                | Eicosanoic acid           | $C_{20}H_{40}O_2$    | 312.3028 | 1 |
| 201                | cis-13-eicosenoic acid    | $C_{20}H_{38}O_2$    | 310.2872 | 1 |
| 202                | Methyl palmitate          | $C_{17}H_{34}O_2$    | 270.2559 | 1 |
| 203                | Methyl linoleate          | $C_{19}H_{34}O_2$    | 294.2559 | 1 |
| 204                | Methyl linolenate         | $C_{19}H_{32}O_2$    | 292.2402 | 1 |
| 205                | Methyl stearate           | $C_{19}H_{38}O_2$    | 298.2872 | 1 |
| 206                | Methyl oleate             | $C_{19}H_{36}O_2$    | 296.2715 | 1 |
| 207                | Hexadecanoic acid         | $C_{16}H_{32}O_2$    | 256.2402 | 1 |
| 208                | 9-hexadecenoic acid       | $C_{16}H_{30}O_2$    | 254.2246 | 1 |
| 209                | Linoleic acid             | $C_{18}H_{32}O_2$    | 280.2402 | 1 |
| 210                | Linolenic acid            | $C_{18}H_{30}O_2$    | 278.2246 | 1 |
| 211                | Stearic acid              | $C_{18}H_{36}O_2$    | 284.2715 | 1 |
| 212                | 9,12-octadecadienoic acid | $C_{18}H_{32}O_2$    | 280.2402 | 1 |
| 213                | Oleic acid                | $C_{18}H_{34}O_2$    | 282.2559 | 1 |
| 214                | Oxiraneoctanoic acid      | $C_{19}H_{36}O_3$    | 312.2664 | 1 |
| 215                | Tetracosanoic acid        | $C_{24}H_{48}O_2$    | 368.3654 | 1 |
| <b>Others</b>      |                           |                      |          |   |
| 216                | Crocin                    | $C_{44}H_{64}O_{24}$ | 976.3788 | 1 |
| 217                | $\beta$ -asparagine       | $C_4H_8N_2O_3$       | 132.0535 | 1 |

## References

1. D. Wang, A. S. Bădărau, M. K. Swamy, S. Shaw, F. Maggi, L. E. da Silva, V. López, A. W. K. Yeung, A. Mocan and A. G. Atanasov, *Front Plant Sci*, 2019, **10**, 834.
2. K. Umehara, M. Nakamura, T. Miyase, M. Kuroyanagi and A. Ueno, *Chemical & Pharmaceutical Bulletin*, 1996, **44**, 2300-2304.
3. Y. Tezuka, K. Yamamoto, S. Awale, F. Le, S. Yomoda and S. Kadota, *Natural Product Communications*, 2013, **8**, 463-466.
4. Y.-N. Yang, X.-Y. Huang, Z.-M. Feng, J.-S. Jiang and P.-C. Zhang, *Journal of Agricultural and Food Chemistry*, 2014, **62**, 9095-9102.
5. Z.-B. Qin, L.-F. Ding, X. Wang, L.-J. Huang, M.-j. Liang, J. Bin, N. Luo, L. Deng and Y.-D. Guo, *Phytochemistry Letters*, 2019, **34**, 43-49.
6. Z. Qin, L. Ding, L. Li, N. Liang, W. Yu, X. Xu, L. Deng and Y. Guo, *Natural Product Research and Development*, 2015, **27**, 2050-2055.
7. Z. Xu, C. Gu, K. Wang, J. Ju, H. Wang, K. Ruan and Y. Feng, *Phytomedicine : international journal of phytotherapy and phytopharmacology*, 2015, **22**, 128-137.

**Table S2** Compounds identified or tentatively characterized in Fructus Arctii by UHPLC/Q-TOF MS.

| NO.            | t <sub>R</sub><br>(min) | Molecular<br>Formula                            | Selected ion       | Measured<br>ion | Error<br>(mDa) | (ESI-/ESI+) MS fragmentaions                                                                                                                                                                                                                                                                                                                                                                            | Identification or characterization                                                                              | Types    |
|----------------|-------------------------|-------------------------------------------------|--------------------|-----------------|----------------|---------------------------------------------------------------------------------------------------------------------------------------------------------------------------------------------------------------------------------------------------------------------------------------------------------------------------------------------------------------------------------------------------------|-----------------------------------------------------------------------------------------------------------------|----------|
| 1 <sup>n</sup> | 2.38                    | C <sub>16</sub> H <sub>19</sub> NO <sub>9</sub> | [M-H] <sup>-</sup> | 368.0975        | -0.7           | 352.1042 [M+H-H <sub>2</sub> O] <sup>+</sup> , 208.0620 [M+H-Glc] <sup>+</sup> , 188.0717 [0.2X+H-COOH-OH] <sup>+</sup> , <b>146.0631</b> [0.2X+H-C <sub>3</sub> H <sub>4</sub> O <sub>4</sub> ] <sup>+</sup>                                                                                                                                                                                           | N-glc-3-hydroxy-indoleacetic acid                                                                               | alkaloid |
| 2*             | 3.65                    | C <sub>16</sub> H <sub>18</sub> O <sub>9</sub>  | [M-H] <sup>-</sup> | 353.0866        | -0.7           | <b>191.0571</b> [M-H-caffeoyl] <sup>-</sup> , 179.0347 [M-H-QA] <sup>-</sup> , 135.0455 [M-H-QA-CO <sub>2</sub> ] <sup>-</sup>                                                                                                                                                                                                                                                                          | 5-O-caffeoylquinic acid                                                                                         | CA       |
| 3              | 4.83                    | C <sub>15</sub> H <sub>18</sub> O <sub>9</sub>  | [M-H] <sup>-</sup> | 341.0884        | 1.1            | <b>179.0312</b> [M-H-Glc] <sup>-</sup> , 135.0296 [M-H-Glc-CO <sub>2</sub> ] <sup>-</sup>                                                                                                                                                                                                                                                                                                               | Caffeic acid 4-O-glucoside                                                                                      | CA       |
| 4*             | 4.97                    | C <sub>16</sub> H <sub>18</sub> O <sub>9</sub>  | [M-H] <sup>-</sup> | 353.0874        | 0.1            | <b>191.0557</b> [M-H-caffeoyl] <sup>-</sup> , 179.0339[M-H-QA] <sup>-</sup> , 161.0245 [M-H-QA-H <sub>2</sub> O] <sup>-</sup> , 135.0447 [M-H-QA-CO <sub>2</sub> ] <sup>-</sup>                                                                                                                                                                                                                         | Chlorogenic acid                                                                                                | CA       |
| 5              | 5.17                    | C <sub>26</sub> H <sub>34</sub> O <sub>12</sub> | [M-H] <sup>-</sup> | 537.1983        | 1.1            | 375.1392 [M-H-Glc] <sup>-</sup> , 327.1234 [M-H-Glc-2H <sub>2</sub> O-C] <sup>-</sup> , <b>297.1145</b> [M-H-Glc-3H <sub>2</sub> O-2C] <sup>-</sup> , 282.0943                                                                                                                                                                                                                                          | Neo-olivil-4-O-β-D-glucopyranoside1                                                                             | Lignans  |
| 6*             | 5.25                    | C <sub>16</sub> H <sub>18</sub> O <sub>9</sub>  | [M-H] <sup>-</sup> | 353.0872        | -0.1           | <b>191.0563</b> [M-H-caffeoyl] <sup>-</sup> , 179.0357[M-H-QA] <sup>-</sup> , 173.0455, 161.0248 [M-H-QA-H <sub>2</sub> O] <sup>-</sup> , 135.0442 [M-H-QA-CO <sub>2</sub> ] <sup>-</sup>                                                                                                                                                                                                               | 4-O-caffeoylquinic acid                                                                                         | CA       |
| 7              | 5.28                    | C <sub>26</sub> H <sub>34</sub> O <sub>12</sub> | [M-H] <sup>-</sup> | 537.2000        | 2.8            | 375.1207 [M-H-Glc] <sup>-</sup> , 327.1264 [M-H-Glc-2H <sub>2</sub> O-C] <sup>-</sup> , <b>297.1139</b> [M-H-Glc-3H <sub>2</sub> O-2C] <sup>-</sup> , 282.0923                                                                                                                                                                                                                                          | Neo-olivil-4-O-β-D-glucopyranoside2                                                                             | Lignans  |
| 8              | 5.45                    | C <sub>9</sub> H <sub>8</sub> O <sub>4</sub>    | [M-H] <sup>-</sup> | 179.0352        | 0.8            | 135.0454 [M-H-CO <sub>2</sub> ] <sup>-</sup>                                                                                                                                                                                                                                                                                                                                                            | caffèic acid                                                                                                    | CA       |
| 9              | 5.95                    | C <sub>16</sub> H <sub>18</sub> O <sub>8</sub>  | [M-H] <sup>-</sup> | 337.0916        | -0.7           | <b>191.0569</b> [M-H-coumaroyl] <sup>-</sup> , 163.0339[M-H-QA] <sup>-</sup>                                                                                                                                                                                                                                                                                                                            | 3-coumaroylquinic acid                                                                                          | CA       |
| 10             | 5.95                    | C <sub>26</sub> H <sub>34</sub> O <sub>12</sub> | [M-H] <sup>-</sup> | 537.1971        | -0.1           | 375.1424 [M-H-Glc] <sup>-</sup> , 357.1353 [M-H-Glc-H <sub>2</sub> O] <sup>-</sup> , 345.1342 [M-H-Glc-H <sub>2</sub> O-C] <sup>-</sup> , <b>327.1248</b> [M-H-Glc-C-2H <sub>2</sub> O] <sup>-</sup> , 312.1039,297.1121 [M-H-Glc-3H <sub>2</sub> O-2C] <sup>-</sup> , 191.0624 C <sub>11</sub> H <sub>11</sub> O <sub>3</sub> , 151.0337 C <sub>8</sub> H <sub>7</sub> O <sub>3</sub>                  | 4,9,4',7'-Tetrahydroxy-3,3'-dimethoxy-7,9'-epoxylignan-4-O-β-D-glucopyranoside                                  | Lignans  |
| 11             | 6.11                    | C <sub>26</sub> H <sub>34</sub> O <sub>12</sub> | [M-H] <sup>-</sup> | 537.1971        | -0.1           | 375.1346 [M-H-Glc] <sup>-</sup> , 357.1292 [M-H-Glc-H <sub>2</sub> O] <sup>-</sup> , 345.1124 [M-H-Glc-H <sub>2</sub> O-C] <sup>-</sup> , <b>327.1235</b> [M-H-Glc-2H <sub>2</sub> O-C] <sup>-</sup> , 312.0995, 297.1056 [M-H-Glc-3H <sub>2</sub> O-2C] <sup>-</sup> , 191.0648 C <sub>11</sub> H <sub>11</sub> O <sub>3</sub> , 151.0318 C <sub>8</sub> H <sub>7</sub> O <sub>3</sub>                 | 4,9,4',7'-Tetrahydroxy-3,3'-dimethoxy-7,9'-epoxylignan-4'-O-β-D-glucopyranoside                                 | Lignans  |
| 12             | 6.64                    | C <sub>26</sub> H <sub>34</sub> O <sub>12</sub> | [M-H] <sup>-</sup> | 537.1964        | -0.8           | 327.1214 [M-H-Glc-2H <sub>2</sub> O-C] <sup>-</sup> , 297.1453 [M-H-Glc-3H <sub>2</sub> O-2C] <sup>-</sup> , <b>165.0536</b> C <sub>9</sub> H <sub>9</sub> O <sub>3</sub> , 150.0296 C <sub>8</sub> H <sub>6</sub> O <sub>3</sub>                                                                                                                                                                       | (8R)-4,9,9'-trihydroxy-3,3'-dimethoxy-7-oxo-8-O-4'-neolignan-4-O-β-D-glucopyranoside                            | Lignans  |
| 13             | 6.72                    | C <sub>26</sub> H <sub>32</sub> O <sub>12</sub> | [M-H] <sup>-</sup> | 535.1814        | -0.2           | <b>373.1283</b> [M-H-Glc] <sup>-</sup> , <b>355.1190</b> [M-H-Glc-H <sub>2</sub> O] <sup>-</sup> , <b>311.1202</b> [M-H-Glc-H <sub>2</sub> O-CO <sub>2</sub> ] <sup>-</sup> , 173.0650 C <sub>11</sub> H <sub>9</sub> O <sub>2</sub>                                                                                                                                                                    | 4,7,4'-trihydroxy-3,3'- dimethoxyl-9-oxo-dibenzylbutyrolactonelignan-4-O-β-D-glucopyranoside1                   | Lignans  |
| 14             | 6.91                    | C <sub>31</sub> H <sub>44</sub> O <sub>16</sub> | [M-H] <sup>-</sup> | 671.2592        | 4.1            | 623.2292 [M-H-2H <sub>2</sub> O-C] <sup>-</sup> , 491.1847 [M-H-2H <sub>2</sub> O-C-Dapi] <sup>-</sup> , 343.1339 [M-H-Dapi-C <sub>10</sub> H <sub>12</sub> O <sub>4</sub> ] <sup>-</sup> , 297.1088 [M-H-Dapi-Glc-C <sub>2</sub> H <sub>8</sub> O <sub>3</sub> ] <sup>-</sup> , <b>217.0552</b> C <sub>12</sub> H <sub>9</sub> O <sub>4</sub> , 173.0612 C <sub>11</sub> H <sub>9</sub> O <sub>2</sub> | (7S,8R)-4,7,9,9'-tetrahydroxy-3,3'-dimethoxy-8-O-4'-neolignan-9'-O-β-Dapiofuranosyl-(1+6)-O-β-D-glucopyranoside | Lignans  |
| 15             | 6.92                    | C <sub>26</sub> H <sub>32</sub> O <sub>12</sub> | [M-H] <sup>-</sup> | 535.1808        | -0.8           | <b>373.1288</b> [M-H-Glc] <sup>-</sup> , <b>355.1178</b> [M-H-Glc-H <sub>2</sub> O] <sup>-</sup> , <b>311.1270</b> [M-H-Glc-H <sub>2</sub> O-CO <sub>2</sub> ] <sup>-</sup> , 173.0567 C <sub>11</sub> H <sub>9</sub> O <sub>2</sub>                                                                                                                                                                    | 4,7,4'-trihydroxy-3,3'- dimethoxyl-9-oxo-dibenzylbutyrolactonelignan-4-O-β-D-glucopyranoside2                   | Lignans  |
| 16             | 6.97                    | C <sub>26</sub> H <sub>36</sub> O <sub>12</sub> | [M-H] <sup>-</sup> | 539.2131        | 0.2            | <b>491.1918</b> [M-H-2HO <sub>2</sub> -C] <sup>-</sup> , 195.0679 C <sub>10</sub> H <sub>11</sub> O <sub>4</sub> , 165.0475 C <sub>9</sub> H <sub>9</sub> O <sub>3</sub>                                                                                                                                                                                                                                | (7S,8R)-7,9,9'-trihydroxy-3,3'-dimethoxy-8-O-4'-neolignan-4-O-β-D-glucopyranoside                               | Lignans  |
| 17             | 7.02                    | C <sub>26</sub> H <sub>32</sub> O <sub>12</sub> | [M-H] <sup>-</sup> | 535.1826        | 1.0            | <b>373.1277</b> [M-H-Glc] <sup>-</sup> , <b>313.1082</b> [M-H-Glc-CH <sub>2</sub> O-CO] <sup>-</sup> , <b>298.0839</b> , 136.0152                                                                                                                                                                                                                                                                       | 7,8-dihydrodehydrodiconiferylalcohol-                                                                           | Lignans  |



|                   |      |                                                 |                          |          |      |                                                                                                                                                                                                                                                                                                                                                                                                                                                                                                                                                                                                                                                                                                                                                                                                                                                                                                                            |                                                                                                                                  |         |
|-------------------|------|-------------------------------------------------|--------------------------|----------|------|----------------------------------------------------------------------------------------------------------------------------------------------------------------------------------------------------------------------------------------------------------------------------------------------------------------------------------------------------------------------------------------------------------------------------------------------------------------------------------------------------------------------------------------------------------------------------------------------------------------------------------------------------------------------------------------------------------------------------------------------------------------------------------------------------------------------------------------------------------------------------------------------------------------------------|----------------------------------------------------------------------------------------------------------------------------------|---------|
| 18                | 7.14 | C <sub>26</sub> H <sub>32</sub> O <sub>12</sub> | [M-H] <sup>-</sup>       | 535.1856 | 4.0  | <b>373.1277</b> [M-H-Glc] <sup>-</sup> , <b>355.1158</b> [M-H-Glc-H <sub>2</sub> O] <sup>-</sup> , <b>311.1235</b> [M-H-Glc-H <sub>2</sub> O-CO <sub>2</sub> ] <sup>-</sup> , 173.0597 C <sub>11</sub> H <sub>9</sub> O <sub>2</sub>                                                                                                                                                                                                                                                                                                                                                                                                                                                                                                                                                                                                                                                                                       | 7'-oxo-4-O-β-D-glucopyranoside 1<br>4,7,4'-trihydroxy-3,3'-dimethoxyl-9-oxo-dibenzylbutyrolactonelignan-4-O-β-D-glucopyranoside3 | Lignans |
| 19                | 7.32 | C <sub>26</sub> H <sub>32</sub> O <sub>12</sub> | [M-H] <sup>-</sup>       | 535.1841 | 2.5  | <b>373.1285</b> [M-H-Glc] <sup>-</sup> , 343.1227, <b>313.1086</b> [M-H-Glc-CH <sub>2</sub> O-CO] <sup>-</sup> , 298.0806                                                                                                                                                                                                                                                                                                                                                                                                                                                                                                                                                                                                                                                                                                                                                                                                  | 7,8-dihydrodehydrodiconiferylalcohol-7'-oxo-4-O-β-D-glucopyranoside 2                                                            | Lignans |
| 20                | 7.50 | C <sub>20</sub> H <sub>24</sub> O <sub>7</sub>  | [M-H] <sup>-</sup>       | 375.1476 | 3.2  | 345.1269 [M-H-H <sub>2</sub> O-C] <sup>-</sup> , <b>193.0476</b> C <sub>10</sub> H <sub>9</sub> O <sub>4</sub>                                                                                                                                                                                                                                                                                                                                                                                                                                                                                                                                                                                                                                                                                                                                                                                                             | Tanegool                                                                                                                         | Lignans |
| 21                | 7.56 | C <sub>26</sub> H <sub>32</sub> O <sub>12</sub> | [M-H] <sup>-</sup>       | 535.1825 | 0.9  | <b>373.1334</b> [M-H-Glc] <sup>-</sup> , <b>151.0410</b> C <sub>8</sub> H <sub>7</sub> O <sub>3</sub> , 136.0178                                                                                                                                                                                                                                                                                                                                                                                                                                                                                                                                                                                                                                                                                                                                                                                                           | (7'S,8'R,8S)-4,4',9'-trihydroxy-3,3'-dimethoxy-7',9-epoxylignan-7-oxo-4-O-β-D-glucopyranoside                                    | Lignans |
| 22                | 7.71 | C <sub>32</sub> H <sub>42</sub> O <sub>16</sub> | [M-H] <sup>-</sup>       | 681.2393 | -0.2 | 519.1833 [M-H-Glc] <sup>-</sup> , 477.1788[M-H-Glc-C <sub>2</sub> H <sub>2</sub> O] <sup>-</sup> , <b>357.1339</b> [M-H-2Glc] <sup>-</sup> , 313.1310 [M-H-2Glc-CO <sub>2</sub> ] <sup>-</sup> , 161.0608C <sub>10</sub> H <sub>9</sub> O <sub>2</sub>                                                                                                                                                                                                                                                                                                                                                                                                                                                                                                                                                                                                                                                                     | Matairesinol-4,4'-di-O-β-D-glucopyranoside                                                                                       | Lignans |
| 23                | 7.89 | C <sub>29</sub> H <sub>38</sub> O <sub>13</sub> | [M-H] <sup>-</sup>       | 593.2267 | 3.3  | <b>431.1768</b> [M-H-Glc] <sup>-</sup> , 413.1558 [M-H-Glc-H <sub>2</sub> O] <sup>-</sup> , 401.1588 [M-H-Glc-H <sub>2</sub> O-C] <sup>-</sup> , 383.1470 [M-H-Glc-2H <sub>2</sub> O-C] <sup>-</sup>                                                                                                                                                                                                                                                                                                                                                                                                                                                                                                                                                                                                                                                                                                                       | 5'-propanediolmatairesinoside                                                                                                    | Lignans |
| 24 <sup>n.a</sup> | 7.90 | C <sub>28</sub> H <sub>38</sub> O <sub>15</sub> | [M-H] <sup>-</sup>       | 613.2163 | 3.1  | 451.1562 [M-H-Glc] <sup>-</sup> , <b>179.0375</b> [caffeic acid-H] <sup>-</sup> , 161.0246, 135.0453 [caffeic acid-H-CO <sub>2</sub> ] <sup>-</sup>                                                                                                                                                                                                                                                                                                                                                                                                                                                                                                                                                                                                                                                                                                                                                                        | Unknown                                                                                                                          | Others  |
| 25                | 7.94 | C <sub>20</sub> H <sub>28</sub> O <sub>10</sub> | [M-H+HCOOH] <sup>-</sup> | 473.1672 | 1.3  | <b>249.1073</b> [M+H-Glc-H <sub>2</sub> O] <sup>+</sup> , 233.0812 [M+H-Glc-H <sub>2</sub> O-CH <sub>4</sub> ] <sup>+</sup> , 189.0884 C <sub>12</sub> H <sub>13</sub> O <sub>2</sub>                                                                                                                                                                                                                                                                                                                                                                                                                                                                                                                                                                                                                                                                                                                                      | Arctiiapolignan A                                                                                                                | Lignans |
| 26*               | 8.47 | C <sub>25</sub> H <sub>24</sub> O <sub>12</sub> | [M-H] <sup>-</sup>       | 515.1189 | -0.1 | <b>353.0875</b> [M-H-caffeoyl] <sup>-</sup> , 335.0766 [M-H-caffeoyl-H <sub>2</sub> O] <sup>-</sup> , 191.0568 [M-H-2caffeoyl] <sup>-</sup> , <b>179.0347</b> [M-H-caffeoyl-QA] <sup>-</sup> , 161.0244 [M-H-caffeoyl-QA-H <sub>2</sub> O] <sup>-</sup> , 135.0461 [M-H-caffeoyl-QA-2H <sub>2</sub> O] <sup>-</sup>                                                                                                                                                                                                                                                                                                                                                                                                                                                                                                                                                                                                        | 3,4-O-dicaffeoylquinic acid                                                                                                      | CA      |
| 27 <sup>n.a</sup> | 8.50 | C <sub>40</sub> H <sub>48</sub> O <sub>14</sub> | [M-H] <sup>-</sup>       | 751.3006 | 4.0  | 733.2917 [M-H-H <sub>2</sub> O] <sup>-</sup> , 715.2670 [M-H-2H <sub>2</sub> O] <sup>-</sup> , 685.2666 [M-H-3H <sub>2</sub> O-C] <sup>-</sup> , 679.2513 [M-H-4H <sub>2</sub> O] <sup>-</sup> , <b>667.2418</b> [M-H-4H <sub>2</sub> O-C] <sup>-</sup> , 637.2427 [M-H-4H <sub>2</sub> O-2C] <sup>-</sup> , 625.2454 [M-H-4H <sub>2</sub> O-3C] <sup>-</sup> , 573.2029 [M-H-C <sub>7</sub> H <sub>10</sub> O <sub>4</sub> -2H <sub>2</sub> O] <sup>-</sup> , 561.2121 [M-H-C <sub>7</sub> H <sub>10</sub> O <sub>4</sub> -2H <sub>2</sub> O-C] <sup>-</sup> , 531.2042 [M-H-C <sub>7</sub> H <sub>10</sub> O <sub>4</sub> -3H <sub>2</sub> O-2C] <sup>-</sup> , 283.0987 C <sub>17</sub> H <sub>15</sub> O <sub>4</sub>                                                                                                                                                                                                  | Lappaol H+2H 1                                                                                                                   | Lignans |
| 28*               | 8.69 | C <sub>25</sub> H <sub>24</sub> O <sub>12</sub> | [M-H] <sup>-</sup>       | 515.1192 | 0.2  | <b>353.0879</b> [M-H-caffeoyl] <sup>-</sup> , 191.0558 [M-H-2caffeoyl] <sup>-</sup> , 179.0353 [M-H-caffeoyl-QA] <sup>-</sup> , 161.0239 [M-H-caffeoyl-QA-H <sub>2</sub> O] <sup>-</sup> , 135.0451 [M-H-caffeoyl-QA-2H <sub>2</sub> O] <sup>-</sup>                                                                                                                                                                                                                                                                                                                                                                                                                                                                                                                                                                                                                                                                       | 3,5-O-dicaffeoylquinic acid                                                                                                      | CA      |
| 29                | 8.83 | C <sub>30</sub> H <sub>34</sub> O <sub>11</sub> | [M-H] <sup>-</sup>       | 569.2009 | -1.4 | <b>533.1802</b> [M-H-2H <sub>2</sub> O] <sup>-</sup> , <b>521.1802</b> [M-H-2H <sub>2</sub> O-C] <sup>-</sup> , 503.1741 [M-H-3H <sub>2</sub> O-C] <sup>-</sup> , 459.1791 [M-H-3H <sub>2</sub> O-2C] <sup>-</sup> , <b>427.1400</b> [M-H-C <sub>7</sub> H <sub>10</sub> O <sub>3</sub> ] <sup>-</sup> , 415.1392 [M-H-C <sub>8</sub> H <sub>10</sub> O <sub>3</sub> ] <sup>-</sup> , 397.1281 [M-H-C <sub>8</sub> H <sub>10</sub> O <sub>3</sub> -H <sub>2</sub> O] <sup>-</sup> , 367.1194 [M-H-C <sub>8</sub> H <sub>10</sub> O <sub>3</sub> -2H <sub>2</sub> O-C] <sup>-</sup>                                                                                                                                                                                                                                                                                                                                         | Reported compound 1                                                                                                              | Lignans |
| 30 <sup>n.a</sup> | 8.90 | C <sub>40</sub> H <sub>48</sub> O <sub>14</sub> | [M-H] <sup>-</sup>       | 751.2966 | 0.1  | 733.2831 [M-H-H <sub>2</sub> O] <sup>-</sup> , 715.2712 [M-H-2H <sub>2</sub> O] <sup>-</sup> , 679.2539 [M-H-4H <sub>2</sub> O] <sup>-</sup> , <b>667.2507</b> [M-H-4H <sub>2</sub> O-C] <sup>-</sup> , 655.2531 [M-H-4H <sub>2</sub> O-2C] <sup>-</sup> , 609.2316 [M-H-C <sub>7</sub> H <sub>10</sub> O <sub>4</sub> ] <sup>-</sup> , 591.2097 [M-H-C <sub>7</sub> H <sub>10</sub> O <sub>4</sub> -H <sub>2</sub> O] <sup>-</sup> , 573.2109 [M-H-C <sub>7</sub> H <sub>10</sub> O <sub>4</sub> -2H <sub>2</sub> O] <sup>-</sup> , 561.2130 [M-H-C <sub>7</sub> H <sub>10</sub> O <sub>4</sub> -2H <sub>2</sub> O-C] <sup>-</sup> , 549.2144 [M-H-C <sub>7</sub> H <sub>10</sub> O <sub>4</sub> -2H <sub>2</sub> O-2C] <sup>-</sup> , 383.1477 C <sub>22</sub> H <sub>23</sub> O <sub>6</sub> , <b>371.1492</b> C <sub>21</sub> H <sub>23</sub> O <sub>6</sub> , 283.0945 C <sub>17</sub> H <sub>15</sub> O <sub>4</sub> | Lappaol H+2H 2                                                                                                                   | Lignans |
| 31 <sup>n.a</sup> | 8.95 | C <sub>30</sub> H <sub>34</sub> O <sub>11</sub> | [M-H] <sup>-</sup>       | 569.2004 | -1.9 | <b>533.1821</b> [M-H-2H <sub>2</sub> O] <sup>-</sup> , <b>521.1889</b> [M-H-2H <sub>2</sub> O-C] <sup>-</sup> , 503.1702 [M-H-3H <sub>2</sub> O-C] <sup>-</sup> , 459.1726 [M-H-3H <sub>2</sub> O-2C] <sup>-</sup> , <b>427.1318</b> [M-H-C <sub>7</sub> H <sub>10</sub> O <sub>3</sub> ] <sup>-</sup> , 415.1403 [M-H-C <sub>8</sub> H <sub>10</sub> O <sub>3</sub> ] <sup>-</sup> , 397.1143 [M-H-C <sub>8</sub> H <sub>10</sub> O <sub>3</sub> -H <sub>2</sub> O] <sup>-</sup> , 367.1235 [M-H-C <sub>8</sub> H <sub>10</sub> O <sub>3</sub> -2H <sub>2</sub> O-C] <sup>-</sup>                                                                                                                                                                                                                                                                                                                                         | Isomer of reported compound 1                                                                                                    | Lignans |

|                   |       |                                                 |                          |          |      |                                                                                                                                                                                                                                                                                                                                                                                                                                                                                                                                                                                                                                                                                                                                                                                                                                                                                                                                                                                                                                                                                                                                                                                                                                                                                                                              |                                                                                                                                             |         |
|-------------------|-------|-------------------------------------------------|--------------------------|----------|------|------------------------------------------------------------------------------------------------------------------------------------------------------------------------------------------------------------------------------------------------------------------------------------------------------------------------------------------------------------------------------------------------------------------------------------------------------------------------------------------------------------------------------------------------------------------------------------------------------------------------------------------------------------------------------------------------------------------------------------------------------------------------------------------------------------------------------------------------------------------------------------------------------------------------------------------------------------------------------------------------------------------------------------------------------------------------------------------------------------------------------------------------------------------------------------------------------------------------------------------------------------------------------------------------------------------------------|---------------------------------------------------------------------------------------------------------------------------------------------|---------|
| 32*               | 8.97  | C <sub>25</sub> H <sub>24</sub> O <sub>12</sub> | [M-H] <sup>-</sup>       | 515.1187 | -0.3 | <b>353.0867</b> [M-H-caffeoyl] <sup>-</sup> , 191.0557 [M-H-2caffeoyl] <sup>-</sup> , <b>179.0346</b> [M-H-caffeoyl-QA] <sup>-</sup> , 161.0256 [M-H-caffeoyl-QA-H <sub>2</sub> O] <sup>-</sup> , 135.0450 [M-H-caffeoyl-QA-2H <sub>2</sub> O] <sup>-</sup>                                                                                                                                                                                                                                                                                                                                                                                                                                                                                                                                                                                                                                                                                                                                                                                                                                                                                                                                                                                                                                                                  | 4,5- <i>O</i> -dicaffeoylquinic acid                                                                                                        | CA      |
| 33                | 9.22  | C <sub>27</sub> H <sub>34</sub> O <sub>12</sub> | [M-H+HCOOH] <sup>-</sup> | 595.2048 | 2.1  | 371.1485 [M+H-Glc-H <sub>2</sub> O] <sup>+</sup> , <b>247.0966</b> [M+H-Glc-H <sub>2</sub> O-C <sub>7</sub> H <sub>8</sub> O <sub>2</sub> ] <sup>+</sup> , 203.1089 C <sub>13</sub> H <sub>15</sub> O <sub>2</sub> , 151.0738 C <sub>9</sub> H <sub>11</sub> O <sub>2</sub>                                                                                                                                                                                                                                                                                                                                                                                                                                                                                                                                                                                                                                                                                                                                                                                                                                                                                                                                                                                                                                                  | (7 <i>S</i> ,8 <i>S</i> ,8' <i>R</i> )-4,7-dihydroxy-3,3',4'-trimethoxyl-9-oxo-dibenzylbutyrolactonelignan-4- <i>O</i> -β-D-glucopyranoside | Lignans |
| 34                | 9.35  | C <sub>25</sub> H <sub>24</sub> O <sub>12</sub> | [M-H] <sup>-</sup>       | 515.1198 | 0.8  | <b>353.0872</b> [M-H-caffeoyl] <sup>-</sup> , 191.0560 [M-H-2caffeoyl] <sup>-</sup> , <b>179.0350</b> [M-H-caffeoyl-QA] <sup>-</sup> , 161.0234 [M-H-caffeoyl-QA-H <sub>2</sub> O] <sup>-</sup> , 135.0452 [M-H-caffeoyl-QA-2H <sub>2</sub> O] <sup>-</sup>                                                                                                                                                                                                                                                                                                                                                                                                                                                                                                                                                                                                                                                                                                                                                                                                                                                                                                                                                                                                                                                                  | 1,5- <i>O</i> -dicaffeoylquinic acid                                                                                                        | CA      |
| 35                | 9.84  | C <sub>42</sub> H <sub>52</sub> O <sub>19</sub> | [M-H] <sup>-</sup>       | 859.3033 | 0.8  | 697.2508 [M-H-Glc] <sup>-</sup> , 535.1967 [M-H-2Glc] <sup>-</sup> , <b>517.1878</b> [M-H-2Glc-H <sub>2</sub> O] <sup>-</sup> , <b>505.1885</b> [M-H-2Glc-H <sub>2</sub> O-C] <sup>-</sup>                                                                                                                                                                                                                                                                                                                                                                                                                                                                                                                                                                                                                                                                                                                                                                                                                                                                                                                                                                                                                                                                                                                                   | Arctiisquineolignan A                                                                                                                       | Lignans |
| 36                | 9.87  | C <sub>26</sub> H <sub>32</sub> O <sub>11</sub> | [M-H] <sup>-</sup>       | 519.1865 | -0.1 | <b>357.1334</b> [M-H-Glc] <sup>-</sup> , 342.1086 [M-H-Glc-CH <sub>3</sub> ] <sup>-</sup> , 313.1322 [M-H-Glc-CO <sub>2</sub> ] <sup>-</sup>                                                                                                                                                                                                                                                                                                                                                                                                                                                                                                                                                                                                                                                                                                                                                                                                                                                                                                                                                                                                                                                                                                                                                                                 | Styraxlignolide E                                                                                                                           | Lignans |
| 37 <sup>n.a</sup> | 9.95  | C <sub>50</sub> H <sub>58</sub> O <sub>18</sub> | [M-H] <sup>-</sup>       | 945.3549 | 0.4  | <b>927.3462</b> [M-H-H <sub>2</sub> O] <sup>-</sup> , 909.3406 [M-H-2H <sub>2</sub> O] <sup>-</sup> , 897.3348 [M-H-2H <sub>2</sub> O-C] <sup>-</sup> , 891.3221 [M-H-3H <sub>2</sub> O] <sup>-</sup> , 879.3265 [M-H-3H <sub>2</sub> O-C] <sup>-</sup> , 873.3196 [M-H-4H <sub>2</sub> O] <sup>-</sup> , 861.3143 [M-H-4H <sub>2</sub> O-C] <sup>-</sup> , 843.2952 [M-H-5H <sub>2</sub> O-C] <sup>-</sup> , 837.2925 [M-H-6H <sub>2</sub> O] <sup>-</sup> , 731.2539 [M-H-5H <sub>2</sub> O-C <sub>7</sub> H <sub>8</sub> O <sub>2</sub> ] <sup>-</sup> , 719.2501 [M-H-5H <sub>2</sub> O-C <sub>7</sub> H <sub>8</sub> O <sub>2</sub> -C] <sup>-</sup> , 707.2517 [M-H-5H <sub>2</sub> O-C <sub>7</sub> H <sub>8</sub> O <sub>2</sub> -2C] <sup>-</sup> , 607.2224 [M-H-C <sub>17</sub> H <sub>22</sub> O <sub>7</sub> ] <sup>-</sup> , 595.2129 [M-H-C <sub>17</sub> H <sub>22</sub> O <sub>7</sub> -C] <sup>-</sup> , 589.2062 [M-H-C <sub>17</sub> H <sub>22</sub> O <sub>7</sub> -H <sub>2</sub> O] <sup>-</sup> , 571.1993 [M-H-C <sub>17</sub> H <sub>22</sub> O <sub>7</sub> -2H <sub>2</sub> O] <sup>-</sup> , 559.1963 [M-H-C <sub>17</sub> H <sub>22</sub> O <sub>7</sub> -2H <sub>2</sub> O-C] <sup>-</sup> , 547.2011 [M-H-C <sub>17</sub> H <sub>22</sub> O <sub>7</sub> -2H <sub>2</sub> O-2C] <sup>-</sup> | Unknown                                                                                                                                     | Lignans |
| 38*               | 10.04 | C <sub>26</sub> H <sub>32</sub> O <sub>11</sub> | [M-H] <sup>-</sup>       | 519.1865 | -0.1 | <b>357.1344</b> [M-H-Glc] <sup>-</sup> , 342.1103 [M-H-Glc-CH <sub>3</sub> ] <sup>-</sup> , 313.1451 [M-H-Glc-CO <sub>2</sub> ] <sup>-</sup> , 221.0825 C <sub>12</sub> H <sub>13</sub> O <sub>4</sub> , 209.0807 C <sub>11</sub> H <sub>13</sub> O <sub>4</sub>                                                                                                                                                                                                                                                                                                                                                                                                                                                                                                                                                                                                                                                                                                                                                                                                                                                                                                                                                                                                                                                             | Matairesinoside                                                                                                                             | Lignans |
| 39 <sup>n.a</sup> | 10.08 | C <sub>50</sub> H <sub>58</sub> O <sub>18</sub> | [M-H] <sup>-</sup>       | 945.3546 | 0.1  | 927.3482 [M-H-H <sub>2</sub> O] <sup>-</sup> , 909.3420 [M-H-2H <sub>2</sub> O] <sup>-</sup> , 897.3309 [M-H-2H <sub>2</sub> O-C] <sup>-</sup> , 879.3152 [M-H-3H <sub>2</sub> O-C] <sup>-</sup> , 861.3094 [M-H-4H <sub>2</sub> O-C] <sup>-</sup> , 785.2729 [M-H-C <sub>7</sub> H <sub>12</sub> O <sub>4</sub> ] <sup>-</sup> , 719.2399 [M-H-C <sub>8</sub> H <sub>18</sub> O <sub>7</sub> ] <sup>-</sup> , 707.2440 [M-H-C <sub>8</sub> H <sub>18</sub> O <sub>7</sub> -C] <sup>-</sup> , 695.2475 [M-H-C <sub>8</sub> H <sub>18</sub> O <sub>7</sub> -2C] <sup>-</sup> , 607.2203 [M-H-C <sub>17</sub> H <sub>22</sub> O <sub>7</sub> ] <sup>-</sup> , 589.2079 [M-H-C <sub>17</sub> H <sub>22</sub> O <sub>7</sub> -H <sub>2</sub> O] <sup>-</sup> , 571.1993 [M-H-C <sub>17</sub> H <sub>22</sub> O <sub>7</sub> -2H <sub>2</sub> O] <sup>-</sup> , <b>559.1992</b> [M-H-C <sub>17</sub> H <sub>22</sub> O <sub>7</sub> -2H <sub>2</sub> O-C] <sup>-</sup> , 547.1976 [M-H-C <sub>17</sub> H <sub>22</sub> O <sub>7</sub> -2H <sub>2</sub> O-2C] <sup>-</sup>                                                                                                                                                                                                                                                         | Unknown                                                                                                                                     | Lignans |
| 40                | 10.12 | C <sub>40</sub> H <sub>46</sub> O <sub>14</sub> | [M-H] <sup>-</sup>       | 749.2876 | -3.3 | 731.2716 [M-H-H <sub>2</sub> O] <sup>-</sup> , 713.2588 [M-H-2H <sub>2</sub> O] <sup>-</sup> , 683.2467 [M-H-2H <sub>2</sub> O-CH <sub>2</sub> O] <sup>-</sup> , 677.2382 [M-H-4H <sub>2</sub> O] <sup>-</sup> , <b>665.2383</b> [M-H-4H <sub>2</sub> O-C] <sup>-</sup> , 653.2382 [M-H-4H <sub>2</sub> O-2C] <sup>-</sup> , 607.2177 [M-H-C <sub>7</sub> H <sub>10</sub> O <sub>4</sub> ] <sup>-</sup> , 589.2061 [M-H-C <sub>7</sub> H <sub>10</sub> O <sub>4</sub> -H <sub>2</sub> O] <sup>-</sup> , 571.1962 [M-H-C <sub>7</sub> H <sub>10</sub> O <sub>4</sub> -2H <sub>2</sub> O] <sup>-</sup> , 559.1967 [M-H-C <sub>7</sub> H <sub>10</sub> O <sub>4</sub> -2H <sub>2</sub> O-C] <sup>-</sup> , 547.1993 [M-H-C <sub>7</sub> H <sub>10</sub> O <sub>4</sub> -2H <sub>2</sub> O-2C] <sup>-</sup> , 531.2050 [M-H-C <sub>7</sub> H <sub>10</sub> O <sub>4</sub> -2H <sub>2</sub> O-2C-O] <sup>-</sup> , 381.1359 C <sub>22</sub> H <sub>21</sub> O <sub>6</sub> , 369.1400 C <sub>21</sub> H <sub>21</sub> O <sub>6</sub> , 297.1141 C <sub>18</sub> H <sub>17</sub> O <sub>4</sub> , 283.0968 C <sub>17</sub> H <sub>15</sub> O <sub>4</sub> , 269.0827 C <sub>16</sub> H <sub>13</sub> O <sub>4</sub>                                                                                                                | Lappaol H                                                                                                                                   | Lignans |
| 41                | 10.21 | C <sub>33</sub> H <sub>44</sub> O <sub>16</sub> | [M-H+HCOOH] <sup>-</sup> | 741.2603 | -0.3 | <b>371.1504</b> [M-H-Gal-Glc] <sup>-</sup> , 357.1302 [M-H-Gal-Glc-CH <sub>2</sub> ] <sup>-</sup>                                                                                                                                                                                                                                                                                                                                                                                                                                                                                                                                                                                                                                                                                                                                                                                                                                                                                                                                                                                                                                                                                                                                                                                                                            | Arctigenin-4- <i>O</i> -α-D-galactopyranosyl-(1→6)- <i>O</i> -β-D-glucopyranoside                                                           | Lignans |

|                   |       |                                                 |                          |          |      |                                                                                                                                                                                                                                                                                                                                                                                                                                                                                                                                                                                                                                                                                                                                                                                                                                                                                                                                                                                                                                                                                                                                                                                                                                                                                                                                                                                                                                                                                                                                                                                                                                                                                                                                                                                                                                                                                                                                                                                                                                                                                                                                                                                                                                                                                                                                                                                                                                                                                                                                                                                                                                                                   |                                                                                 |         |
|-------------------|-------|-------------------------------------------------|--------------------------|----------|------|-------------------------------------------------------------------------------------------------------------------------------------------------------------------------------------------------------------------------------------------------------------------------------------------------------------------------------------------------------------------------------------------------------------------------------------------------------------------------------------------------------------------------------------------------------------------------------------------------------------------------------------------------------------------------------------------------------------------------------------------------------------------------------------------------------------------------------------------------------------------------------------------------------------------------------------------------------------------------------------------------------------------------------------------------------------------------------------------------------------------------------------------------------------------------------------------------------------------------------------------------------------------------------------------------------------------------------------------------------------------------------------------------------------------------------------------------------------------------------------------------------------------------------------------------------------------------------------------------------------------------------------------------------------------------------------------------------------------------------------------------------------------------------------------------------------------------------------------------------------------------------------------------------------------------------------------------------------------------------------------------------------------------------------------------------------------------------------------------------------------------------------------------------------------------------------------------------------------------------------------------------------------------------------------------------------------------------------------------------------------------------------------------------------------------------------------------------------------------------------------------------------------------------------------------------------------------------------------------------------------------------------------------------------------|---------------------------------------------------------------------------------|---------|
| 42                | 10.36 | C <sub>33</sub> H <sub>44</sub> O <sub>16</sub> | [M-H+HCOOH] <sup>-</sup> | 741.2603 | -0.3 | 371.1467 [M-H-Gen] <sup>-</sup> , <b>357.1354</b> [M-H-Gen-CH <sub>2</sub> ] <sup>-</sup><br>927.3464 [M-H-H <sub>2</sub> O] <sup>-</sup> , 909.3374 [M-H-2H <sub>2</sub> O] <sup>-</sup> , 897.3365 [M-H-2H <sub>2</sub> O-C] <sup>-</sup> , 803.2944 [M-H-C <sub>7</sub> H <sub>10</sub> O <sub>3</sub> ] <sup>-</sup> , 791.2944 [M-H-C <sub>7</sub> H <sub>10</sub> O <sub>3</sub> -C] <sup>-</sup> , 779.2865 [M-H-C <sub>7</sub> H <sub>10</sub> O <sub>3</sub> -2C] <sup>-</sup> , 747.2700 [M-H-C <sub>10</sub> H <sub>14</sub> O <sub>4</sub> ] <sup>-</sup> , 729.2593 [M-H-C <sub>10</sub> H <sub>14</sub> O <sub>4</sub> -H <sub>2</sub> O] <sup>-</sup> , 561.2154 [M-H-C <sub>18</sub> H <sub>24</sub> O <sub>9</sub> ] <sup>-</sup> , <b>549.2164</b> [M-H-C <sub>18</sub> H <sub>24</sub> O <sub>9</sub> -C] <sup>-</sup> , 543.2064 [M-H-C <sub>18</sub> H <sub>24</sub> O <sub>9</sub> -H <sub>2</sub> O] <sup>-</sup> , 531.2056 [M-H-C <sub>18</sub> H <sub>24</sub> O <sub>9</sub> -H <sub>2</sub> O-C] <sup>-</sup> , 517.1867 [M-H-C <sub>18</sub> H <sub>24</sub> O <sub>9</sub> -H <sub>2</sub> O-C-CH <sub>2</sub> ] <sup>-</sup> , 505.1927 [M-H-C <sub>18</sub> H <sub>24</sub> O <sub>9</sub> -H <sub>2</sub> O-2C-CH <sub>2</sub> ] <sup>-</sup> , 455.1721 [M-H-C <sub>25</sub> H <sub>30</sub> O <sub>10</sub> ] <sup>-</sup> , 443.1726 [M-H-C <sub>25</sub> H <sub>30</sub> O <sub>10</sub> -C] <sup>-</sup> , 437.1549 [M-H-C <sub>25</sub> H <sub>30</sub> O <sub>10</sub> -H <sub>2</sub> O] <sup>-</sup> , 425.1621 [M-H-C <sub>25</sub> H <sub>30</sub> O <sub>10</sub> -C-H <sub>2</sub> O] <sup>-</sup> , 409.1605 [M-H-C <sub>25</sub> H <sub>30</sub> O <sub>10</sub> -CO-H <sub>2</sub> O] <sup>-</sup><br><b>517.1909</b> [M-H-2H <sub>2</sub> O] <sup>-</sup> , 505.1886 [M-H-2H <sub>2</sub> O-C] <sup>-</sup> , 475.1722 [M-H-2H <sub>2</sub> O-C-CH <sub>2</sub> O] <sup>-</sup> , 411.1457 [M-H-C <sub>7</sub> H <sub>10</sub> O <sub>3</sub> ] <sup>-</sup> , 399.1420 [M-H-C <sub>7</sub> H <sub>10</sub> O <sub>3</sub> -C] <sup>-</sup>                                                                                                                                                                                                                                                                                                                                                                                                                                                                                                                                                                     | Arctigenin-4- <i>O</i> -β-D-gentiobioside                                       | Lignans |
| 43 <sup>n,a</sup> | 10.53 | C <sub>50</sub> H <sub>58</sub> O <sub>18</sub> | [M-H] <sup>-</sup>       | 945.3549 | 0.4  | C <sub>18</sub> H <sub>24</sub> O <sub>9</sub> -H <sub>2</sub> O] <sup>-</sup> , 531.2056 [M-H-C <sub>18</sub> H <sub>24</sub> O <sub>9</sub> -H <sub>2</sub> O-C] <sup>-</sup> , 517.1867 [M-H-C <sub>18</sub> H <sub>24</sub> O <sub>9</sub> -H <sub>2</sub> O-C-CH <sub>2</sub> ] <sup>-</sup> , 505.1927 [M-H-C <sub>18</sub> H <sub>24</sub> O <sub>9</sub> -H <sub>2</sub> O-2C-CH <sub>2</sub> ] <sup>-</sup> , 455.1721 [M-H-C <sub>25</sub> H <sub>30</sub> O <sub>10</sub> ] <sup>-</sup> , 443.1726 [M-H-C <sub>25</sub> H <sub>30</sub> O <sub>10</sub> -C] <sup>-</sup> , 437.1549 [M-H-C <sub>25</sub> H <sub>30</sub> O <sub>10</sub> -H <sub>2</sub> O] <sup>-</sup> , 425.1621 [M-H-C <sub>25</sub> H <sub>30</sub> O <sub>10</sub> -C-H <sub>2</sub> O] <sup>-</sup> , 409.1605 [M-H-C <sub>25</sub> H <sub>30</sub> O <sub>10</sub> -CO-H <sub>2</sub> O] <sup>-</sup><br><b>517.1909</b> [M-H-2H <sub>2</sub> O] <sup>-</sup> , 505.1886 [M-H-2H <sub>2</sub> O-C] <sup>-</sup> , 475.1722 [M-H-2H <sub>2</sub> O-C-CH <sub>2</sub> O] <sup>-</sup> , 411.1457 [M-H-C <sub>7</sub> H <sub>10</sub> O <sub>3</sub> ] <sup>-</sup> , 399.1420 [M-H-C <sub>7</sub> H <sub>10</sub> O <sub>3</sub> -C] <sup>-</sup>                                                                                                                                                                                                                                                                                                                                                                                                                                                                                                                                                                                                                                                                                                                                                                                                                                                                                                                                                                                                                                                                                                                                                                                                                                                                                                                                                                                                                               | Unknown                                                                         | Lignans |
| 44                | 10.57 | C <sub>30</sub> H <sub>34</sub> O <sub>10</sub> | [M-H] <sup>-</sup>       | 553.2079 | 0.5  | [M-H-2H <sub>2</sub> O-C-CH <sub>2</sub> O] <sup>-</sup> , 411.1457 [M-H-C <sub>7</sub> H <sub>10</sub> O <sub>3</sub> ] <sup>-</sup> , 399.1420 [M-H-C <sub>7</sub> H <sub>10</sub> O <sub>3</sub> -C] <sup>-</sup>                                                                                                                                                                                                                                                                                                                                                                                                                                                                                                                                                                                                                                                                                                                                                                                                                                                                                                                                                                                                                                                                                                                                                                                                                                                                                                                                                                                                                                                                                                                                                                                                                                                                                                                                                                                                                                                                                                                                                                                                                                                                                                                                                                                                                                                                                                                                                                                                                                              | Arctignan A                                                                     | Lignans |
| 45                | 10.88 | C <sub>32</sub> H <sub>42</sub> O <sub>15</sub> | [M-H+HCOOH] <sup>-</sup> | 711.2520 | 2.0  | <b>373.1568</b> [M+H-Api-Glc] <sup>+</sup> , 355.1512 [M+H-Api-Glc-H <sub>2</sub> O] <sup>+</sup><br>927.3433 [M-H-H <sub>2</sub> O] <sup>-</sup> , 909.3214 [M-H-2H <sub>2</sub> O] <sup>-</sup> , 879.3303 [M-H-3H <sub>2</sub> O-C] <sup>-</sup> , 861.3129 [M-H-4H <sub>2</sub> O-C] <sup>-</sup> , <b>747.2651</b> [M-H-C <sub>10</sub> H <sub>14</sub> O <sub>4</sub> ] <sup>-</sup> , 729.2482 [M-H-C <sub>10</sub> H <sub>14</sub> O <sub>4</sub> -H <sub>2</sub> O] <sup>-</sup> , 663.2224 [M-H-C <sub>10</sub> H <sub>14</sub> O <sub>4</sub> -4H <sub>2</sub> O-C] <sup>-</sup> , 651.2294 [M-H-C <sub>10</sub> H <sub>14</sub> O <sub>4</sub> -4H <sub>2</sub> O-2C] <sup>-</sup> , 557.1829 [M-H-C <sub>18</sub> H <sub>28</sub> O <sub>9</sub> ] <sup>-</sup> , 531.1929 [M-H-C <sub>18</sub> H <sub>28</sub> O <sub>9</sub> -H <sub>2</sub> O-C] <sup>-</sup> , 517.1909 [M-H-C <sub>18</sub> H <sub>28</sub> O <sub>9</sub> -H <sub>2</sub> O-2C-2H] <sup>-</sup> , <b>505.1860</b> [M-H-C <sub>18</sub> H <sub>28</sub> O <sub>9</sub> -O-3C] <sup>-</sup>                                                                                                                                                                                                                                                                                                                                                                                                                                                                                                                                                                                                                                                                                                                                                                                                                                                                                                                                                                                                                                                                                                                                                                                                                                                                                                                                                                                                                                                                                                                                                                                      | Arctigenin-4- <i>O</i> -β-D-apiofuranosyl-(1→6)- <i>O</i> -β-D-glucopyranoside1 | Lignans |
| 46 <sup>n,a</sup> | 11.05 | C <sub>50</sub> H <sub>58</sub> O <sub>18</sub> | [M-H] <sup>-</sup>       | 945.3549 | 0.4  | C <sub>10</sub> H <sub>14</sub> O <sub>4</sub> -4H <sub>2</sub> O-C] <sup>-</sup> , 651.2294 [M-H-C <sub>10</sub> H <sub>14</sub> O <sub>4</sub> -4H <sub>2</sub> O-2C] <sup>-</sup> , 557.1829 [M-H-C <sub>18</sub> H <sub>28</sub> O <sub>9</sub> ] <sup>-</sup> , 531.1929 [M-H-C <sub>18</sub> H <sub>28</sub> O <sub>9</sub> -H <sub>2</sub> O-C] <sup>-</sup> , 517.1909 [M-H-C <sub>18</sub> H <sub>28</sub> O <sub>9</sub> -H <sub>2</sub> O-2C-2H] <sup>-</sup> , <b>505.1860</b> [M-H-C <sub>18</sub> H <sub>28</sub> O <sub>9</sub> -O-3C] <sup>-</sup>                                                                                                                                                                                                                                                                                                                                                                                                                                                                                                                                                                                                                                                                                                                                                                                                                                                                                                                                                                                                                                                                                                                                                                                                                                                                                                                                                                                                                                                                                                                                                                                                                                                                                                                                                                                                                                                                                                                                                                                                                                                                                                | Unknown                                                                         | Lignans |
| 47                | 11.07 | C <sub>32</sub> H <sub>42</sub> O <sub>15</sub> | [M-H+HCOOH] <sup>-</sup> | 711.2532 | 3.2  | <b>373.1621</b> [M+H-Api-Glc] <sup>+</sup> , 355.1624 [M+H-Api-Glc-H <sub>2</sub> O] <sup>+</sup>                                                                                                                                                                                                                                                                                                                                                                                                                                                                                                                                                                                                                                                                                                                                                                                                                                                                                                                                                                                                                                                                                                                                                                                                                                                                                                                                                                                                                                                                                                                                                                                                                                                                                                                                                                                                                                                                                                                                                                                                                                                                                                                                                                                                                                                                                                                                                                                                                                                                                                                                                                 | Arctigenin-4- <i>O</i> -β-D-apiofuranosyl-(1→6)- <i>O</i> -β-D-glucopyranoside2 | Lignans |
| 48 <sup>n</sup>   | 11.22 | C <sub>27</sub> H <sub>32</sub> O <sub>11</sub> | [M-H+HCOOH] <sup>-</sup> | 577.1937 | 1.6  | <b>369.1364</b> [M-H-Glc] <sup>-</sup> , 354.1084 [M-H-Glc-CH <sub>3</sub> ] <sup>-</sup> , 203.0352 C <sub>11</sub> H <sub>7</sub> O <sub>4</sub> , 174.0683 C <sub>11</sub> H <sub>10</sub> O <sub>2</sub> , 159.0374 C <sub>10</sub> H <sub>7</sub> O <sub>2</sub><br>927.3427 [M-H-H <sub>2</sub> O] <sup>-</sup> , 909.3539 [M-H-2H <sub>2</sub> O] <sup>-</sup> , 897.3338 [M-H-2H <sub>2</sub> O-C] <sup>-</sup> , 879.3211 [M-H-3H <sub>2</sub> O-C] <sup>-</sup> , 861.3249 [M-H-4H <sub>2</sub> O-C] <sup>-</sup> , 849.3149 [M-H-4H <sub>2</sub> O-2C] <sup>-</sup> , 803.2888 [M-H-C <sub>7</sub> H <sub>10</sub> O <sub>3</sub> ] <sup>-</sup> , 665.2405 [M-H-C <sub>11</sub> H <sub>20</sub> O <sub>8</sub> ] <sup>-</sup> , <b>561.2144</b> [M-H-C <sub>18</sub> H <sub>24</sub> O <sub>9</sub> ] <sup>-</sup> , 549.2159 [M-H-C <sub>18</sub> H <sub>24</sub> O <sub>9</sub> -C] <sup>-</sup> , 543.2045 [M-H-C <sub>18</sub> H <sub>24</sub> O <sub>9</sub> -H <sub>2</sub> O] <sup>-</sup> , 531.2003 [M-H-C <sub>18</sub> H <sub>24</sub> O <sub>9</sub> -H <sub>2</sub> O-C] <sup>-</sup> , 517.1884 [M-H-C <sub>18</sub> H <sub>24</sub> O <sub>9</sub> -H <sub>2</sub> O-C-CH <sub>2</sub> ] <sup>-</sup> , 505.1880 [M-H-C <sub>18</sub> H <sub>24</sub> O <sub>9</sub> -H <sub>2</sub> O-2C-CH <sub>2</sub> ] <sup>-</sup> , 455.1650 [M-H-C <sub>25</sub> H <sub>30</sub> O <sub>10</sub> ] <sup>-</sup><br>927.3459 [M-H-H <sub>2</sub> O] <sup>-</sup> , 909.3396 [M-H-2H <sub>2</sub> O] <sup>-</sup> , 897.3337 [M-H-2H <sub>2</sub> O-C] <sup>-</sup> , 879.3193 [M-H-3H <sub>2</sub> O-C] <sup>-</sup> , 861.3155 [M-H-4H <sub>2</sub> O-C] <sup>-</sup> , 849.3155 [M-H-4H <sub>2</sub> O-2C] <sup>-</sup> , 803.2881 [M-H-C <sub>7</sub> H <sub>10</sub> O <sub>3</sub> ] <sup>-</sup> , <b>665.2411</b> [M-H-C <sub>11</sub> H <sub>20</sub> O <sub>8</sub> ] <sup>-</sup> , 653.2399 [M-H-C <sub>11</sub> H <sub>20</sub> O <sub>8</sub> -C] <sup>-</sup> , 561.2106 [M-H-C <sub>18</sub> H <sub>24</sub> O <sub>9</sub> ] <sup>-</sup> , 549.2118 [M-H-C <sub>18</sub> H <sub>24</sub> O <sub>9</sub> -C] <sup>-</sup> , 531.1990 [M-H-C <sub>18</sub> H <sub>24</sub> O <sub>9</sub> -H <sub>2</sub> O-C] <sup>-</sup> , 517.1878 [M-H-C <sub>18</sub> H <sub>24</sub> O <sub>9</sub> -H <sub>2</sub> O-C-CH <sub>2</sub> ] <sup>-</sup> , 505.1909 [M-H-C <sub>18</sub> H <sub>24</sub> O <sub>9</sub> -H <sub>2</sub> O-2C-CH <sub>2</sub> ] <sup>-</sup> , 455.1564 [M-H-C <sub>25</sub> H <sub>30</sub> O <sub>10</sub> ] <sup>-</sup> , 443.1540 [M-H-C <sub>25</sub> H <sub>30</sub> O <sub>10</sub> -C] <sup>-</sup> | Hemislienoside                                                                  | Lignans |
| 49 <sup>n,a</sup> | 11.29 | C <sub>50</sub> H <sub>58</sub> O <sub>18</sub> | [M-H] <sup>-</sup>       | 945.3549 | 0.4  | C <sub>18</sub> H <sub>24</sub> O <sub>9</sub> -H <sub>2</sub> O] <sup>-</sup> , 531.2003 [M-H-C <sub>18</sub> H <sub>24</sub> O <sub>9</sub> -H <sub>2</sub> O-C] <sup>-</sup> , 517.1884 [M-H-C <sub>18</sub> H <sub>24</sub> O <sub>9</sub> -H <sub>2</sub> O-C-CH <sub>2</sub> ] <sup>-</sup> , 505.1880 [M-H-C <sub>18</sub> H <sub>24</sub> O <sub>9</sub> -H <sub>2</sub> O-2C-CH <sub>2</sub> ] <sup>-</sup> , 455.1650 [M-H-C <sub>25</sub> H <sub>30</sub> O <sub>10</sub> ] <sup>-</sup><br>927.3459 [M-H-H <sub>2</sub> O] <sup>-</sup> , 909.3396 [M-H-2H <sub>2</sub> O] <sup>-</sup> , 897.3337 [M-H-2H <sub>2</sub> O-C] <sup>-</sup> , 879.3193 [M-H-3H <sub>2</sub> O-C] <sup>-</sup> , 861.3155 [M-H-4H <sub>2</sub> O-C] <sup>-</sup> , 849.3155 [M-H-4H <sub>2</sub> O-2C] <sup>-</sup> , 803.2881 [M-H-C <sub>7</sub> H <sub>10</sub> O <sub>3</sub> ] <sup>-</sup> , <b>665.2411</b> [M-H-C <sub>11</sub> H <sub>20</sub> O <sub>8</sub> ] <sup>-</sup> , 653.2399 [M-H-C <sub>11</sub> H <sub>20</sub> O <sub>8</sub> -C] <sup>-</sup> , 561.2106 [M-H-C <sub>18</sub> H <sub>24</sub> O <sub>9</sub> ] <sup>-</sup> , 549.2118 [M-H-C <sub>18</sub> H <sub>24</sub> O <sub>9</sub> -C] <sup>-</sup> , 531.1990 [M-H-C <sub>18</sub> H <sub>24</sub> O <sub>9</sub> -H <sub>2</sub> O-C] <sup>-</sup> , 517.1878 [M-H-C <sub>18</sub> H <sub>24</sub> O <sub>9</sub> -H <sub>2</sub> O-C-CH <sub>2</sub> ] <sup>-</sup> , 505.1909 [M-H-C <sub>18</sub> H <sub>24</sub> O <sub>9</sub> -H <sub>2</sub> O-2C-CH <sub>2</sub> ] <sup>-</sup> , 455.1564 [M-H-C <sub>25</sub> H <sub>30</sub> O <sub>10</sub> ] <sup>-</sup> , 443.1540 [M-H-C <sub>25</sub> H <sub>30</sub> O <sub>10</sub> -C] <sup>-</sup>                                                                                                                                                                                                                                                                                                                                                                                                                                                                                                                                                                                                                                                                                                                                                                                                                                                                                                                                | Unknown                                                                         | Lignans |
| 50 <sup>n,a</sup> | 11.39 | C <sub>50</sub> H <sub>58</sub> O <sub>18</sub> | [M-H] <sup>-</sup>       | 945.3549 | 0.4  | C <sub>11</sub> H <sub>20</sub> O <sub>8</sub> -C] <sup>-</sup> , 561.2106 [M-H-C <sub>18</sub> H <sub>24</sub> O <sub>9</sub> ] <sup>-</sup> , 549.2118 [M-H-C <sub>18</sub> H <sub>24</sub> O <sub>9</sub> -C] <sup>-</sup> , 531.1990 [M-H-C <sub>18</sub> H <sub>24</sub> O <sub>9</sub> -H <sub>2</sub> O-C] <sup>-</sup> , 517.1878 [M-H-C <sub>18</sub> H <sub>24</sub> O <sub>9</sub> -H <sub>2</sub> O-C-CH <sub>2</sub> ] <sup>-</sup> , 505.1909 [M-H-C <sub>18</sub> H <sub>24</sub> O <sub>9</sub> -H <sub>2</sub> O-2C-CH <sub>2</sub> ] <sup>-</sup> , 455.1564 [M-H-C <sub>25</sub> H <sub>30</sub> O <sub>10</sub> ] <sup>-</sup> , 443.1540 [M-H-C <sub>25</sub> H <sub>30</sub> O <sub>10</sub> -C] <sup>-</sup>                                                                                                                                                                                                                                                                                                                                                                                                                                                                                                                                                                                                                                                                                                                                                                                                                                                                                                                                                                                                                                                                                                                                                                                                                                                                                                                                                                                                                                                                                                                                                                                                                                                                                                                                                                                                                                                                                                                               | Unknown                                                                         | Lignans |
| 51 <sup>n,a</sup> | 11.41 | C <sub>40</sub> H <sub>46</sub> O <sub>14</sub> | [M-H] <sup>-</sup>       | 749.2803 | -0.6 | 731.2734 [M-H-H <sub>2</sub> O] <sup>-</sup> , 713.2621 [M-H-2H <sub>2</sub> O] <sup>-</sup> , 701.2598 [M-                                                                                                                                                                                                                                                                                                                                                                                                                                                                                                                                                                                                                                                                                                                                                                                                                                                                                                                                                                                                                                                                                                                                                                                                                                                                                                                                                                                                                                                                                                                                                                                                                                                                                                                                                                                                                                                                                                                                                                                                                                                                                                                                                                                                                                                                                                                                                                                                                                                                                                                                                       | Unknown                                                                         | Lignans |

|                   |       |                                                 |                          |          |      |                                                                                                                                                                                                                                                                                                                                                                                                                                                                                                                                                                                                                                                                                                                                                                                                                                                                                                                                                                                                                                                                                                                                                                                                                                                                                                                                                                                                                                                                                                                                                                                                                                                                                                                                                                                                                                                                                                                                                                                                                                                                                                                                                                                                                                                                                                                                                                                                                                                                                                                                                                                                                                                                                                                                                                                                                                        |                        |         |
|-------------------|-------|-------------------------------------------------|--------------------------|----------|------|----------------------------------------------------------------------------------------------------------------------------------------------------------------------------------------------------------------------------------------------------------------------------------------------------------------------------------------------------------------------------------------------------------------------------------------------------------------------------------------------------------------------------------------------------------------------------------------------------------------------------------------------------------------------------------------------------------------------------------------------------------------------------------------------------------------------------------------------------------------------------------------------------------------------------------------------------------------------------------------------------------------------------------------------------------------------------------------------------------------------------------------------------------------------------------------------------------------------------------------------------------------------------------------------------------------------------------------------------------------------------------------------------------------------------------------------------------------------------------------------------------------------------------------------------------------------------------------------------------------------------------------------------------------------------------------------------------------------------------------------------------------------------------------------------------------------------------------------------------------------------------------------------------------------------------------------------------------------------------------------------------------------------------------------------------------------------------------------------------------------------------------------------------------------------------------------------------------------------------------------------------------------------------------------------------------------------------------------------------------------------------------------------------------------------------------------------------------------------------------------------------------------------------------------------------------------------------------------------------------------------------------------------------------------------------------------------------------------------------------------------------------------------------------------------------------------------------------|------------------------|---------|
| 52                | 11.46 | C <sub>30</sub> H <sub>34</sub> O <sub>10</sub> | [M-H] <sup>-</sup>       | 553.2084 | 1.0  | H-2H <sub>2</sub> O-C <sup>-</sup> ], 695.2499 [M-H-3H <sub>2</sub> O] <sup>-</sup> , 677.2419 [M-H-4H <sub>2</sub> O] <sup>-</sup> , <b>665.2399 [M-H-4H<sub>2</sub>O-C]<sup>-</sup></b> , 653.2397 [M-H-4H <sub>2</sub> O-2C] <sup>-</sup> , 607.2142 [M-H-C <sub>7</sub> H <sub>10</sub> O <sub>3</sub> ] <sup>-</sup> , 571.2095 [M-H-C <sub>7</sub> H <sub>10</sub> O <sub>3</sub> -2H <sub>2</sub> O] <sup>-</sup> , 559.1992 [M-H-C <sub>7</sub> H <sub>10</sub> O <sub>3</sub> -2H <sub>2</sub> O-C] <sup>-</sup> , 547.1972 [M-H-C <sub>7</sub> H <sub>10</sub> O <sub>3</sub> -2H <sub>2</sub> O-2C] <sup>-</sup> , 283.1004 C <sub>17</sub> H <sub>15</sub> O <sub>4</sub> , 269.0808 C <sub>16</sub> H <sub>13</sub> O <sub>4</sub> , 517.1888 [M-H-2H <sub>2</sub> O] <sup>-</sup> , <b>505.1888 [M-H-2H<sub>2</sub>O-C]<sup>-</sup></b> , 475.1426 [M-H-2H <sub>2</sub> O-C-CH <sub>2</sub> O] <sup>-</sup> , 411.1464 [M-H-C <sub>7</sub> H <sub>10</sub> O <sub>3</sub> ] <sup>-</sup> , 399.1460 [M-H-C <sub>7</sub> H <sub>10</sub> O <sub>3</sub> -C] <sup>-</sup> , 731.2726 [M-H-H <sub>2</sub> O] <sup>-</sup> , 713.2621 [M-H-2H <sub>2</sub> O] <sup>-</sup> , <b>701.2627[M-H-2H<sub>2</sub>O-C]<sup>-</sup></b> , 683.2510[M-H-2H <sub>2</sub> O-CH <sub>2</sub> O] <sup>-</sup> , 665.2396 [M-H-4H <sub>2</sub> O-C] <sup>-</sup> , 653.2400 [M-H-4H <sub>2</sub> O-2C] <sup>-</sup> , 607.2191 [M-H-C <sub>7</sub> H <sub>10</sub> O <sub>3</sub> ] <sup>-</sup> , 589.2055 [M-H-C <sub>7</sub> H <sub>10</sub> O <sub>3</sub> -H <sub>2</sub> O] <sup>-</sup> , 571.2007 [M-H-C <sub>7</sub> H <sub>10</sub> O <sub>3</sub> -2H <sub>2</sub> O] <sup>-</sup> , 559.2000 [M-H-C <sub>7</sub> H <sub>10</sub> O <sub>3</sub> -2H <sub>2</sub> O-C] <sup>-</sup> , 283.0990 C <sub>17</sub> H <sub>15</sub> O <sub>4</sub> , 269.0835 C <sub>16</sub> H <sub>13</sub> O <sub>4</sub> , <b>371.1519 [M-H-Glc]<sup>-</sup></b> , 357.1269 [M-H-Glc-H <sub>2</sub> O] <sup>-</sup> , 235.0983 C <sub>13</sub> H <sub>15</sub> O <sub>4</sub> , 121.0359 C <sub>7</sub> H <sub>5</sub> O <sub>2</sub>                                                                                                                                                                                                                                                                                                                                                                                                                                                                                                                                                                                                                                                                                                            | Isolappaol C           | Lignans |
| 53 <sup>n.a</sup> | 11.49 | C <sub>40</sub> H <sub>46</sub> O <sub>14</sub> | [M-H] <sup>-</sup>       | 749.2817 | 0.8  | 517.1885 [M-H-2H <sub>2</sub> O] <sup>-</sup> , <b>505.1881 [M-H-2H<sub>2</sub>O-C]<sup>-</sup></b> , 411.1461 [M-H-C <sub>7</sub> H <sub>10</sub> O <sub>3</sub> ] <sup>-</sup> , 399.1470 [M-H-C <sub>7</sub> H <sub>10</sub> O <sub>3</sub> -C] <sup>-</sup> , 731.2709 [M-H-H <sub>2</sub> O] <sup>-</sup> , 713.2628 [M-H-2H <sub>2</sub> O] <sup>-</sup> , <b>701.2604 [M-H-2H<sub>2</sub>O-C]<sup>-</sup></b> , 695.2542 [M-H-3H <sub>2</sub> O] <sup>-</sup> , 683.2504 [M-H-2H <sub>2</sub> O-CH <sub>2</sub> O] <sup>-</sup> , 665.2426[M-H-4H <sub>2</sub> O-C] <sup>-</sup> , 653.2403 [M-H-4H <sub>2</sub> O-2C] <sup>-</sup> , 607.2191 [M-H-C <sub>7</sub> H <sub>10</sub> O <sub>3</sub> ] <sup>-</sup> , 589.2085 [M-H-C <sub>7</sub> H <sub>10</sub> O <sub>3</sub> -H <sub>2</sub> O] <sup>-</sup> , 571.1968 [M-H-C <sub>7</sub> H <sub>10</sub> O <sub>3</sub> -2H <sub>2</sub> O] <sup>-</sup> , 381.1357 C <sub>22</sub> H <sub>21</sub> O <sub>6</sub> , 297.1127 C <sub>18</sub> H <sub>17</sub> O <sub>4</sub>                                                                                                                                                                                                                                                                                                                                                                                                                                                                                                                                                                                                                                                                                                                                                                                                                                                                                                                                                                                                                                                                                                                                                                                                                                                                                                                                                                                                                                                                                                                                                                                                                                                                                                                                                                                               | Unknown                | Lignans |
| 54*               | 11.56 | C <sub>27</sub> H <sub>34</sub> O <sub>11</sub> | [M-H+HCOOH] <sup>-</sup> | 579.2119 | 4.1  | <b>371.1519 [M-H-Glc]<sup>-</sup></b> , 357.1269 [M-H-Glc-H <sub>2</sub> O] <sup>-</sup> , 235.0983 C <sub>13</sub> H <sub>15</sub> O <sub>4</sub> , 121.0359 C <sub>7</sub> H <sub>5</sub> O <sub>2</sub>                                                                                                                                                                                                                                                                                                                                                                                                                                                                                                                                                                                                                                                                                                                                                                                                                                                                                                                                                                                                                                                                                                                                                                                                                                                                                                                                                                                                                                                                                                                                                                                                                                                                                                                                                                                                                                                                                                                                                                                                                                                                                                                                                                                                                                                                                                                                                                                                                                                                                                                                                                                                                             | Arctiin                | Lignans |
| 55                | 11.69 | C <sub>30</sub> H <sub>34</sub> O <sub>10</sub> | [M-H] <sup>-</sup>       | 553.2084 | 1.0  | 517.1885 [M-H-2H <sub>2</sub> O] <sup>-</sup> , <b>505.1881 [M-H-2H<sub>2</sub>O-C]<sup>-</sup></b> , 411.1461 [M-H-C <sub>7</sub> H <sub>10</sub> O <sub>3</sub> ] <sup>-</sup> , 399.1470 [M-H-C <sub>7</sub> H <sub>10</sub> O <sub>3</sub> -C] <sup>-</sup> , 731.2709 [M-H-H <sub>2</sub> O] <sup>-</sup> , 713.2628 [M-H-2H <sub>2</sub> O] <sup>-</sup> , <b>701.2604 [M-H-2H<sub>2</sub>O-C]<sup>-</sup></b> , 695.2542 [M-H-3H <sub>2</sub> O] <sup>-</sup> , 683.2504 [M-H-2H <sub>2</sub> O-CH <sub>2</sub> O] <sup>-</sup> , 665.2426[M-H-4H <sub>2</sub> O-C] <sup>-</sup> , 653.2403 [M-H-4H <sub>2</sub> O-2C] <sup>-</sup> , 607.2191 [M-H-C <sub>7</sub> H <sub>10</sub> O <sub>3</sub> ] <sup>-</sup> , 589.2085 [M-H-C <sub>7</sub> H <sub>10</sub> O <sub>3</sub> -H <sub>2</sub> O] <sup>-</sup> , 571.1968 [M-H-C <sub>7</sub> H <sub>10</sub> O <sub>3</sub> -2H <sub>2</sub> O] <sup>-</sup> , 381.1357 C <sub>22</sub> H <sub>21</sub> O <sub>6</sub> , 297.1127 C <sub>18</sub> H <sub>17</sub> O <sub>4</sub>                                                                                                                                                                                                                                                                                                                                                                                                                                                                                                                                                                                                                                                                                                                                                                                                                                                                                                                                                                                                                                                                                                                                                                                                                                                                                                                                                                                                                                                                                                                                                                                                                                                                                                                                                                                               | Lappaol C              | Lignans |
| 56 <sup>n</sup>   | 11.75 | C <sub>40</sub> H <sub>46</sub> O <sub>14</sub> | [M-H] <sup>-</sup>       | 749.2809 | 0.0  | 371.1504 [M-H-H <sub>2</sub> O] <sup>-</sup> , <b>330.1502 [M-H-COOH-CH<sub>2</sub>]<sup>-</sup></b> , 909.3343 [M-H-H <sub>2</sub> O] <sup>-</sup> , 879.3279 [M-H-2H <sub>2</sub> O-C] <sup>-</sup> , 861.3060 [M-H-3H <sub>2</sub> O-C] <sup>-</sup> , 843.3069 [M-H-4H <sub>2</sub> O-C] <sup>-</sup> , 837.3087[M-H-5H <sub>2</sub> O] <sup>-</sup> , 825.2944 [M-H-5H <sub>2</sub> O-C] <sup>-</sup> , <b>813.2916 [M-H-5H<sub>2</sub>O-2C]<sup>-</sup></b> , 801.2926 [M-H-5H <sub>2</sub> O-3C] <sup>-</sup> , 785.2798 [M-H-C <sub>7</sub> H <sub>10</sub> O <sub>3</sub> ] <sup>-</sup> , 737.2724 [M-H-C <sub>7</sub> H <sub>10</sub> O <sub>3</sub> -4C] <sup>-</sup> , 719.2517 [M-H-C <sub>8</sub> H <sub>16</sub> O <sub>6</sub> ] <sup>-</sup> , 707.2501 [M-H-C <sub>8</sub> H <sub>16</sub> O <sub>6</sub> -C] <sup>-</sup> , 567.2302 [M-H-Glc] <sup>-</sup> , 553.2021 [M-H-Glc-CH <sub>2</sub> ] <sup>-</sup> , 549.2149[M-H-Glc-H <sub>2</sub> O] <sup>-</sup> , 531.1986 [M-H-Glc-2H <sub>2</sub> O] <sup>-</sup> , 519.2030[M-H-Glc-2H <sub>2</sub> O-C] <sup>-</sup> , 517.1917 [M-H-Glc-2H <sub>2</sub> O-CH <sub>2</sub> ] <sup>-</sup> , 505.1887 [M-H-Glc-2H <sub>2</sub> O-CH <sub>2</sub> -C] <sup>-</sup> , 411.1429 [M-H-C <sub>14</sub> H <sub>22</sub> O <sub>8</sub> ] <sup>-</sup> , <b>401.1627 [M-H-C<sub>15</sub>H<sub>20</sub>O<sub>8</sub>]<sup>-</sup></b> , 383.1520 [M-H-C <sub>15</sub> H <sub>20</sub> O <sub>8</sub> -H <sub>2</sub> O] <sup>-</sup> , 371.1513 [M-H-C <sub>15</sub> H <sub>20</sub> O <sub>8</sub> -H <sub>2</sub> O-C] <sup>-</sup> , 165.0569 C <sub>9</sub> H <sub>9</sub> O <sub>3</sub> , 731.2668 [M-H-H <sub>2</sub> O] <sup>-</sup> , 683.2380 [M-H-2H <sub>2</sub> O-CH <sub>2</sub> O] <sup>-</sup> , 607.2179 [M-H-C <sub>7</sub> H <sub>10</sub> O <sub>3</sub> ] <sup>-</sup> , 589.1982 [M-H-C <sub>7</sub> H <sub>10</sub> O <sub>3</sub> -H <sub>2</sub> O] <sup>-</sup> , 571.1968 [M-H-C <sub>7</sub> H <sub>10</sub> O <sub>3</sub> -2H <sub>2</sub> O] <sup>-</sup> , 559.1964 [M-H-C <sub>7</sub> H <sub>10</sub> O <sub>3</sub> -2H <sub>2</sub> O-C] <sup>-</sup> , <b>401.1620 [M-H-C<sub>18</sub>H<sub>20</sub>O<sub>7</sub>]<sup>-</sup></b> , 383.1521 [M-H-C <sub>18</sub> H <sub>20</sub> O <sub>7</sub> -H <sub>2</sub> O] <sup>-</sup> , 909.3367 [M-H-H <sub>2</sub> O] <sup>-</sup> , 879.3209 [M-H-2H <sub>2</sub> O-C] <sup>-</sup> , 861.3148 [M-H-3H <sub>2</sub> O-C] <sup>-</sup> , 843.3069 [M-H-4H <sub>2</sub> O-C] <sup>-</sup> , 837.2950 [M-H-5H <sub>2</sub> O] <sup>-</sup> , 825.2936 [M-H-5H <sub>2</sub> O-C] <sup>-</sup> , <b>813.2916 [M-H-5H<sub>2</sub>O-2C]<sup>-</sup></b> , 801.2901 [M-H-5H <sub>2</sub> O-3C] <sup>-</sup> , 785.2778 [M-H-C <sub>7</sub> H <sub>10</sub> O <sub>3</sub> ] <sup>-</sup> , | Cerberalignan A        | Lignans |
| 57                | 11.85 | C <sub>21</sub> H <sub>26</sub> O <sub>7</sub>  | [M-H] <sup>-</sup>       | 389.1626 | 2.6  | 371.1504 [M-H-H <sub>2</sub> O] <sup>-</sup> , <b>330.1502 [M-H-COOH-CH<sub>2</sub>]<sup>-</sup></b> , 909.3343 [M-H-H <sub>2</sub> O] <sup>-</sup> , 879.3279 [M-H-2H <sub>2</sub> O-C] <sup>-</sup> , 861.3060 [M-H-3H <sub>2</sub> O-C] <sup>-</sup> , 843.3069 [M-H-4H <sub>2</sub> O-C] <sup>-</sup> , 837.3087[M-H-5H <sub>2</sub> O] <sup>-</sup> , 825.2944 [M-H-5H <sub>2</sub> O-C] <sup>-</sup> , <b>813.2916 [M-H-5H<sub>2</sub>O-2C]<sup>-</sup></b> , 801.2926 [M-H-5H <sub>2</sub> O-3C] <sup>-</sup> , 785.2798 [M-H-C <sub>7</sub> H <sub>10</sub> O <sub>3</sub> ] <sup>-</sup> , 737.2724 [M-H-C <sub>7</sub> H <sub>10</sub> O <sub>3</sub> -4C] <sup>-</sup> , 719.2517 [M-H-C <sub>8</sub> H <sub>16</sub> O <sub>6</sub> ] <sup>-</sup> , 707.2501 [M-H-C <sub>8</sub> H <sub>16</sub> O <sub>6</sub> -C] <sup>-</sup> , 567.2302 [M-H-Glc] <sup>-</sup> , 553.2021 [M-H-Glc-CH <sub>2</sub> ] <sup>-</sup> , 549.2149[M-H-Glc-H <sub>2</sub> O] <sup>-</sup> , 531.1986 [M-H-Glc-2H <sub>2</sub> O] <sup>-</sup> , 519.2030[M-H-Glc-2H <sub>2</sub> O-C] <sup>-</sup> , 517.1917 [M-H-Glc-2H <sub>2</sub> O-CH <sub>2</sub> ] <sup>-</sup> , 505.1887 [M-H-Glc-2H <sub>2</sub> O-CH <sub>2</sub> -C] <sup>-</sup> , 411.1429 [M-H-C <sub>14</sub> H <sub>22</sub> O <sub>8</sub> ] <sup>-</sup> , <b>401.1627 [M-H-C<sub>15</sub>H<sub>20</sub>O<sub>8</sub>]<sup>-</sup></b> , 383.1520 [M-H-C <sub>15</sub> H <sub>20</sub> O <sub>8</sub> -H <sub>2</sub> O] <sup>-</sup> , 371.1513 [M-H-C <sub>15</sub> H <sub>20</sub> O <sub>8</sub> -H <sub>2</sub> O-C] <sup>-</sup> , 165.0569 C <sub>9</sub> H <sub>9</sub> O <sub>3</sub> , 731.2668 [M-H-H <sub>2</sub> O] <sup>-</sup> , 683.2380 [M-H-2H <sub>2</sub> O-CH <sub>2</sub> O] <sup>-</sup> , 607.2179 [M-H-C <sub>7</sub> H <sub>10</sub> O <sub>3</sub> ] <sup>-</sup> , 589.1982 [M-H-C <sub>7</sub> H <sub>10</sub> O <sub>3</sub> -H <sub>2</sub> O] <sup>-</sup> , 571.1968 [M-H-C <sub>7</sub> H <sub>10</sub> O <sub>3</sub> -2H <sub>2</sub> O] <sup>-</sup> , 559.1964 [M-H-C <sub>7</sub> H <sub>10</sub> O <sub>3</sub> -2H <sub>2</sub> O-C] <sup>-</sup> , <b>401.1620 [M-H-C<sub>18</sub>H<sub>20</sub>O<sub>7</sub>]<sup>-</sup></b> , 383.1521 [M-H-C <sub>18</sub> H <sub>20</sub> O <sub>7</sub> -H <sub>2</sub> O] <sup>-</sup> , 909.3367 [M-H-H <sub>2</sub> O] <sup>-</sup> , 879.3209 [M-H-2H <sub>2</sub> O-C] <sup>-</sup> , 861.3148 [M-H-3H <sub>2</sub> O-C] <sup>-</sup> , 843.3069 [M-H-4H <sub>2</sub> O-C] <sup>-</sup> , 837.2950 [M-H-5H <sub>2</sub> O] <sup>-</sup> , 825.2936 [M-H-5H <sub>2</sub> O-C] <sup>-</sup> , <b>813.2916 [M-H-5H<sub>2</sub>O-2C]<sup>-</sup></b> , 801.2901 [M-H-5H <sub>2</sub> O-3C] <sup>-</sup> , 785.2778 [M-H-C <sub>7</sub> H <sub>10</sub> O <sub>3</sub> ] <sup>-</sup> , | Arctigenic acid        | Lignans |
| 58 <sup>n.a</sup> | 11.88 | C <sub>50</sub> H <sub>56</sub> O <sub>17</sub> | [M-H] <sup>-</sup>       | 927.3446 | 0.7  | 567.2302 [M-H-Glc] <sup>-</sup> , 553.2021 [M-H-Glc-CH <sub>2</sub> ] <sup>-</sup> , 549.2149[M-H-Glc-H <sub>2</sub> O] <sup>-</sup> , 531.1986 [M-H-Glc-2H <sub>2</sub> O] <sup>-</sup> , 519.2030[M-H-Glc-2H <sub>2</sub> O-C] <sup>-</sup> , 517.1917 [M-H-Glc-2H <sub>2</sub> O-CH <sub>2</sub> ] <sup>-</sup> , 505.1887 [M-H-Glc-2H <sub>2</sub> O-CH <sub>2</sub> -C] <sup>-</sup> , 411.1429 [M-H-C <sub>14</sub> H <sub>22</sub> O <sub>8</sub> ] <sup>-</sup> , <b>401.1627 [M-H-C<sub>15</sub>H<sub>20</sub>O<sub>8</sub>]<sup>-</sup></b> , 383.1520 [M-H-C <sub>15</sub> H <sub>20</sub> O <sub>8</sub> -H <sub>2</sub> O] <sup>-</sup> , 371.1513 [M-H-C <sub>15</sub> H <sub>20</sub> O <sub>8</sub> -H <sub>2</sub> O-C] <sup>-</sup> , 165.0569 C <sub>9</sub> H <sub>9</sub> O <sub>3</sub> , 731.2668 [M-H-H <sub>2</sub> O] <sup>-</sup> , 683.2380 [M-H-2H <sub>2</sub> O-CH <sub>2</sub> O] <sup>-</sup> , 607.2179 [M-H-C <sub>7</sub> H <sub>10</sub> O <sub>3</sub> ] <sup>-</sup> , 589.1982 [M-H-C <sub>7</sub> H <sub>10</sub> O <sub>3</sub> -H <sub>2</sub> O] <sup>-</sup> , 571.1968 [M-H-C <sub>7</sub> H <sub>10</sub> O <sub>3</sub> -2H <sub>2</sub> O] <sup>-</sup> , 559.1964 [M-H-C <sub>7</sub> H <sub>10</sub> O <sub>3</sub> -2H <sub>2</sub> O-C] <sup>-</sup> , <b>401.1620 [M-H-C<sub>18</sub>H<sub>20</sub>O<sub>7</sub>]<sup>-</sup></b> , 383.1521 [M-H-C <sub>18</sub> H <sub>20</sub> O <sub>7</sub> -H <sub>2</sub> O] <sup>-</sup> , 909.3367 [M-H-H <sub>2</sub> O] <sup>-</sup> , 879.3209 [M-H-2H <sub>2</sub> O-C] <sup>-</sup> , 861.3148 [M-H-3H <sub>2</sub> O-C] <sup>-</sup> , 843.3069 [M-H-4H <sub>2</sub> O-C] <sup>-</sup> , 837.2950 [M-H-5H <sub>2</sub> O] <sup>-</sup> , 825.2936 [M-H-5H <sub>2</sub> O-C] <sup>-</sup> , <b>813.2916 [M-H-5H<sub>2</sub>O-2C]<sup>-</sup></b> , 801.2901 [M-H-5H <sub>2</sub> O-3C] <sup>-</sup> , 785.2778 [M-H-C <sub>7</sub> H <sub>10</sub> O <sub>3</sub> ] <sup>-</sup> ,                                                                                                                                                                                                                                                                                                                                                                                                                                                                                                                                                                                                                                                                                                                                                                                                                                                 | Unknown                | Lignans |
| 59 <sup>n.a</sup> | 11.92 | C <sub>37</sub> H <sub>46</sub> O <sub>15</sub> | [M-H+HCOOH] <sup>-</sup> | 775.2833 | 2.0  | 567.2302 [M-H-Glc] <sup>-</sup> , 553.2021 [M-H-Glc-CH <sub>2</sub> ] <sup>-</sup> , 549.2149[M-H-Glc-H <sub>2</sub> O] <sup>-</sup> , 531.1986 [M-H-Glc-2H <sub>2</sub> O] <sup>-</sup> , 519.2030[M-H-Glc-2H <sub>2</sub> O-C] <sup>-</sup> , 517.1917 [M-H-Glc-2H <sub>2</sub> O-CH <sub>2</sub> ] <sup>-</sup> , 505.1887 [M-H-Glc-2H <sub>2</sub> O-CH <sub>2</sub> -C] <sup>-</sup> , 411.1429 [M-H-C <sub>14</sub> H <sub>22</sub> O <sub>8</sub> ] <sup>-</sup> , <b>401.1627 [M-H-C<sub>15</sub>H<sub>20</sub>O<sub>8</sub>]<sup>-</sup></b> , 383.1520 [M-H-C <sub>15</sub> H <sub>20</sub> O <sub>8</sub> -H <sub>2</sub> O] <sup>-</sup> , 371.1513 [M-H-C <sub>15</sub> H <sub>20</sub> O <sub>8</sub> -H <sub>2</sub> O-C] <sup>-</sup> , 165.0569 C <sub>9</sub> H <sub>9</sub> O <sub>3</sub> , 731.2668 [M-H-H <sub>2</sub> O] <sup>-</sup> , 683.2380 [M-H-2H <sub>2</sub> O-CH <sub>2</sub> O] <sup>-</sup> , 607.2179 [M-H-C <sub>7</sub> H <sub>10</sub> O <sub>3</sub> ] <sup>-</sup> , 589.1982 [M-H-C <sub>7</sub> H <sub>10</sub> O <sub>3</sub> -H <sub>2</sub> O] <sup>-</sup> , 571.1968 [M-H-C <sub>7</sub> H <sub>10</sub> O <sub>3</sub> -2H <sub>2</sub> O] <sup>-</sup> , 559.1964 [M-H-C <sub>7</sub> H <sub>10</sub> O <sub>3</sub> -2H <sub>2</sub> O-C] <sup>-</sup> , <b>401.1620 [M-H-C<sub>18</sub>H<sub>20</sub>O<sub>7</sub>]<sup>-</sup></b> , 383.1521 [M-H-C <sub>18</sub> H <sub>20</sub> O <sub>7</sub> -H <sub>2</sub> O] <sup>-</sup> , 909.3367 [M-H-H <sub>2</sub> O] <sup>-</sup> , 879.3209 [M-H-2H <sub>2</sub> O-C] <sup>-</sup> , 861.3148 [M-H-3H <sub>2</sub> O-C] <sup>-</sup> , 843.3069 [M-H-4H <sub>2</sub> O-C] <sup>-</sup> , 837.2950 [M-H-5H <sub>2</sub> O] <sup>-</sup> , 825.2936 [M-H-5H <sub>2</sub> O-C] <sup>-</sup> , <b>813.2916 [M-H-5H<sub>2</sub>O-2C]<sup>-</sup></b> , 801.2901 [M-H-5H <sub>2</sub> O-3C] <sup>-</sup> , 785.2778 [M-H-C <sub>7</sub> H <sub>10</sub> O <sub>3</sub> ] <sup>-</sup> ,                                                                                                                                                                                                                                                                                                                                                                                                                                                                                                                                                                                                                                                                                                                                                                                                                                                 | Lappaol D isomer 2+Glc | Lignans |
| 60 <sup>n.a</sup> | 11.94 | C <sub>40</sub> H <sub>46</sub> O <sub>14</sub> | [M-H] <sup>-</sup>       | 749.2806 | -0.3 | 909.3367 [M-H-H <sub>2</sub> O] <sup>-</sup> , 879.3209 [M-H-2H <sub>2</sub> O-C] <sup>-</sup> , 861.3148 [M-H-3H <sub>2</sub> O-C] <sup>-</sup> , 843.3069 [M-H-4H <sub>2</sub> O-C] <sup>-</sup> , 837.2950 [M-H-5H <sub>2</sub> O] <sup>-</sup> , 825.2936 [M-H-5H <sub>2</sub> O-C] <sup>-</sup> , <b>813.2916 [M-H-5H<sub>2</sub>O-2C]<sup>-</sup></b> , 801.2901 [M-H-5H <sub>2</sub> O-3C] <sup>-</sup> , 785.2778 [M-H-C <sub>7</sub> H <sub>10</sub> O <sub>3</sub> ] <sup>-</sup> ,                                                                                                                                                                                                                                                                                                                                                                                                                                                                                                                                                                                                                                                                                                                                                                                                                                                                                                                                                                                                                                                                                                                                                                                                                                                                                                                                                                                                                                                                                                                                                                                                                                                                                                                                                                                                                                                                                                                                                                                                                                                                                                                                                                                                                                                                                                                                          | Unknown                | Lignans |
| 61 <sup>n.a</sup> | 11.98 | C <sub>50</sub> H <sub>56</sub> O <sub>17</sub> | [M-H] <sup>-</sup>       | 927.3468 | 2.9  | 909.3367 [M-H-H <sub>2</sub> O] <sup>-</sup> , 879.3209 [M-H-2H <sub>2</sub> O-C] <sup>-</sup> , 861.3148 [M-H-3H <sub>2</sub> O-C] <sup>-</sup> , 843.3069 [M-H-4H <sub>2</sub> O-C] <sup>-</sup> , 837.2950 [M-H-5H <sub>2</sub> O] <sup>-</sup> , 825.2936 [M-H-5H <sub>2</sub> O-C] <sup>-</sup> , <b>813.2916 [M-H-5H<sub>2</sub>O-2C]<sup>-</sup></b> , 801.2901 [M-H-5H <sub>2</sub> O-3C] <sup>-</sup> , 785.2778 [M-H-C <sub>7</sub> H <sub>10</sub> O <sub>3</sub> ] <sup>-</sup> ,                                                                                                                                                                                                                                                                                                                                                                                                                                                                                                                                                                                                                                                                                                                                                                                                                                                                                                                                                                                                                                                                                                                                                                                                                                                                                                                                                                                                                                                                                                                                                                                                                                                                                                                                                                                                                                                                                                                                                                                                                                                                                                                                                                                                                                                                                                                                          | Unknown                | Lignans |

|                   |       |                                                 |                          |          |      |                                                                                                                                                                                                                                                                                                                                                                                                                                                                                                                                                                                                                                                                                                                                                                                                                                                                                                                                                                                                                                                                                                                                                                                                                                                                                                                                                                                                                                                                                                                                                                                                                                            |                                |         |
|-------------------|-------|-------------------------------------------------|--------------------------|----------|------|--------------------------------------------------------------------------------------------------------------------------------------------------------------------------------------------------------------------------------------------------------------------------------------------------------------------------------------------------------------------------------------------------------------------------------------------------------------------------------------------------------------------------------------------------------------------------------------------------------------------------------------------------------------------------------------------------------------------------------------------------------------------------------------------------------------------------------------------------------------------------------------------------------------------------------------------------------------------------------------------------------------------------------------------------------------------------------------------------------------------------------------------------------------------------------------------------------------------------------------------------------------------------------------------------------------------------------------------------------------------------------------------------------------------------------------------------------------------------------------------------------------------------------------------------------------------------------------------------------------------------------------------|--------------------------------|---------|
| 62                | 12.04 | C <sub>40</sub> H <sub>46</sub> O <sub>13</sub> | [M-H] <sup>-</sup>       | 733.2875 | 1.5  | 737.2511 [M-H-C <sub>7</sub> H <sub>10</sub> O <sub>3</sub> -4C] <sup>-</sup> , 719.2506 [M-H-C <sub>8</sub> H <sub>16</sub> O <sub>6</sub> ] <sup>-</sup> , 707.2485 [M-H-C <sub>8</sub> H <sub>16</sub> O <sub>6</sub> -C] <sup>-</sup> , 715.2650 [M-H-H <sub>2</sub> O] <sup>-</sup> , 679.2506 [M-H-3H <sub>2</sub> O] <sup>-</sup> , <b>667.2499</b> [M-H-3H <sub>2</sub> O-C] <sup>-</sup> , 655.2571 [M-H-3H <sub>2</sub> O-2C] <sup>-</sup> , 561.2104 [M-H-C <sub>8</sub> H <sub>12</sub> O <sub>4</sub> ] <sup>-</sup> , 283.1009 C <sub>17</sub> H <sub>15</sub> O <sub>4</sub>                                                                                                                                                                                                                                                                                                                                                                                                                                                                                                                                                                                                                                                                                                                                                                                                                                                                                                                                                                                                                                                | Reported compound 2            | Lignans |
| 63 <sup>n.a</sup> | 12.13 | C <sub>40</sub> H <sub>46</sub> O <sub>13</sub> | [M-H] <sup>-</sup>       | 733.2857 | -0.3 | 715.2682 [M-H-H <sub>2</sub> O] <sup>-</sup> , 703.2774 [M-H-H <sub>2</sub> O-C] <sup>-</sup> , 685.2607 [M-H-2H <sub>2</sub> O] <sup>-</sup> , 679.2534 [M-H-3H <sub>2</sub> O] <sup>-</sup> , <b>667.2510</b> [M-H-3H <sub>2</sub> O-C] <sup>-</sup> , 655.2532 [M-H-3H <sub>2</sub> O-2C] <sup>-</sup> , 607.2153 [M-H-C <sub>7</sub> H <sub>10</sub> O <sub>2</sub> ] <sup>-</sup> , 561.2122 [M-H-C <sub>8</sub> H <sub>12</sub> O <sub>4</sub> ] <sup>-</sup>                                                                                                                                                                                                                                                                                                                                                                                                                                                                                                                                                                                                                                                                                                                                                                                                                                                                                                                                                                                                                                                                                                                                                                        | Isomer of reported compound 2  | Lignans |
| 64 <sup>n.a</sup> | 12.17 | C <sub>37</sub> H <sub>46</sub> O <sub>15</sub> | [M-H+HCOOH] <sup>-</sup> | 775.2836 | 2.3  | <b>567.2255</b> [M-H-Glc] <sup>-</sup> , 551.1943 [M-H-Glc-CH <sub>4</sub> ] <sup>-</sup> , 535.2009 [M-H-Glc-CH <sub>2</sub> -H <sub>2</sub> O] <sup>-</sup> , 533.1823 [M-H-Glc-CH <sub>4</sub> -H <sub>2</sub> O] <sup>-</sup> , 519.2036 [M-H-Glc-2H <sub>2</sub> O-C] <sup>-</sup> , 517.1891 [M-H-Glc-2H <sub>2</sub> O-CH <sub>2</sub> ] <sup>-</sup> , <b>505.1881</b> [M-H-Glc-2H <sub>2</sub> O-CH <sub>2</sub> -C] <sup>-</sup> , 411.1393 [M-H-C <sub>14</sub> H <sub>22</sub> O <sub>8</sub> ] <sup>-</sup> , 195.0673 C <sub>10</sub> H <sub>11</sub> O <sub>4</sub> , 165.0571 C <sub>9</sub> H <sub>9</sub> O <sub>3</sub>                                                                                                                                                                                                                                                                                                                                                                                                                                                                                                                                                                                                                                                                                                                                                                                                                                                                                                                                                                                                 | LappaolD+Glc                   | Lignans |
| 65 <sup>n.a</sup> | 12.25 | C <sub>47</sub> H <sub>52</sub> O <sub>16</sub> | [M-H] <sup>-</sup>       | 871.3205 | 2.8  | 853.3063 [M-H-H <sub>2</sub> O] <sup>-</sup> , 835.2906 [M-H-2H <sub>2</sub> O] <sup>-</sup> , 823.3036 [M-H-2H <sub>2</sub> O-C] <sup>-</sup> , 805.2818 [M-H-3H <sub>2</sub> O-C] <sup>-</sup> , 787.2744 [M-H-4H <sub>2</sub> O-C] <sup>-</sup> , 775.2717 [M-H-4H <sub>2</sub> O-2C] <sup>-</sup> , 731.2573 [M-H-5H <sub>2</sub> O-4C] <sup>-</sup> , 687.3163 [M-H-C <sub>7</sub> H <sub>4</sub> O <sub>6</sub> ] <sup>-</sup> , 683.2485 [M-H-C <sub>8</sub> H <sub>12</sub> O <sub>5</sub> ] <sup>-</sup> , 681.2343 [M-H-C <sub>8</sub> H <sub>12</sub> O <sub>5</sub> -2H] <sup>-</sup> , 671.2440 [M-H-C <sub>8</sub> H <sub>12</sub> O <sub>5</sub> -C] <sup>-</sup> , 665.2408 [M-H-C <sub>8</sub> H <sub>12</sub> O <sub>5</sub> -H <sub>2</sub> O] <sup>-</sup> , 653.2430 [M-H-C <sub>8</sub> H <sub>12</sub> O <sub>5</sub> -H <sub>2</sub> O-C] <sup>-</sup> , <b>479.2620</b> C <sub>26</sub> H <sub>39</sub> O <sub>8</sub>                                                                                                                                                                                                                                                                                                                                                                                                                                                                                                                                                                                                                                                                                            | Unknown                        | Lignans |
| 66 <sup>n.a</sup> | 12.25 | C <sub>50</sub> H <sub>56</sub> O <sub>17</sub> | [M-H] <sup>-</sup>       | 927.3452 | 1.3  | 909.3383 [M-H-H <sub>2</sub> O] <sup>-</sup> , 897.3375 [M-H-H <sub>2</sub> O-C] <sup>-</sup> , 879.3265 [M-H-2H <sub>2</sub> O-C] <sup>-</sup> , 861.3177 [M-H-3H <sub>2</sub> O-C] <sup>-</sup> , 843.2952 [M-H-4H <sub>2</sub> O-C] <sup>-</sup> , 837.3044 [M-H-5H <sub>2</sub> O] <sup>-</sup> , 825.2925 [M-H-5H <sub>2</sub> O-C] <sup>-</sup> , <b>813.2953</b> [M-H-5H <sub>2</sub> O-2C] <sup>-</sup> , 801.2835 [M-H-5H <sub>2</sub> O-3C] <sup>-</sup> , 785.2709 [M-H-C <sub>7</sub> H <sub>10</sub> O <sub>3</sub> ] <sup>-</sup> , 737.2626 [M-H-C <sub>7</sub> H <sub>10</sub> O <sub>3</sub> -4C] <sup>-</sup> , 719.2507 [M-H-C <sub>8</sub> H <sub>16</sub> O <sub>6</sub> ] <sup>-</sup>                                                                                                                                                                                                                                                                                                                                                                                                                                                                                                                                                                                                                                                                                                                                                                                                                                                                                                                               | Unknown                        | Lignans |
| 67 <sup>n.a</sup> | 12.31 | C <sub>21</sub> H <sub>22</sub> O <sub>6</sub>  | [M-H] <sup>-</sup>       | 369.1373 | 3.5  | 354.1124 [M-H-CH <sub>3</sub> ] <sup>-</sup> , 203.0363 C <sub>11</sub> H <sub>7</sub> O <sub>4</sub> , <b>174.0703</b> C <sub>11</sub> H <sub>10</sub> O <sub>2</sub>                                                                                                                                                                                                                                                                                                                                                                                                                                                                                                                                                                                                                                                                                                                                                                                                                                                                                                                                                                                                                                                                                                                                                                                                                                                                                                                                                                                                                                                                     | 7,8-didehydroarctigenin isomer | Lignans |
| 68 <sup>n.a</sup> | 12.35 | C <sub>50</sub> H <sub>56</sub> O <sub>17</sub> | [M-H] <sup>-</sup>       | 927.3463 | 2.4  | 909.3338 [M-H-H <sub>2</sub> O] <sup>-</sup> , 897.3338 [M-H-H <sub>2</sub> O-C] <sup>-</sup> , 879.3309 [M-H-2H <sub>2</sub> O-C] <sup>-</sup> , 861.3174 [M-H-3H <sub>2</sub> O-C] <sup>-</sup> , 843.3010 [M-H-4H <sub>2</sub> O-C] <sup>-</sup> , 825.2930 [M-H-5H <sub>2</sub> O-C] <sup>-</sup> , <b>813.2962</b> [M-H-5H <sub>2</sub> O-2C] <sup>-</sup> , 801.2856 [M-H-5H <sub>2</sub> O-3C] <sup>-</sup> , 785.2724 [M-H-C <sub>7</sub> H <sub>10</sub> O <sub>3</sub> ] <sup>-</sup> , 719.2539 [M-H-C <sub>8</sub> H <sub>16</sub> O <sub>6</sub> ] <sup>-</sup> , 707.2502 [M-H-C <sub>8</sub> H <sub>16</sub> O <sub>6</sub> -C] <sup>-</sup>                                                                                                                                                                                                                                                                                                                                                                                                                                                                                                                                                                                                                                                                                                                                                                                                                                                                                                                                                                                | Unknown                        | Lignans |
| 69 <sup>n.a</sup> | 12.43 | C <sub>50</sub> H <sub>58</sub> O <sub>18</sub> | [M-H] <sup>-</sup>       | 945.3549 | 0.4  | 927.3447 [M-H-H <sub>2</sub> O] <sup>-</sup> , 909.3270 [M-H-2H <sub>2</sub> O] <sup>-</sup> , 897.3295 [M-H-2H <sub>2</sub> O-C] <sup>-</sup> , 879.3223 [M-H-3H <sub>2</sub> O-C] <sup>-</sup> , 683.2411 [M-H-C <sub>11</sub> H <sub>18</sub> O <sub>7</sub> ] <sup>-</sup> , 665.2435 [M-H-C <sub>11</sub> H <sub>18</sub> O <sub>7</sub> -H <sub>2</sub> O] <sup>-</sup> , 653.2437 [M-H-C <sub>11</sub> H <sub>18</sub> O <sub>7</sub> -H <sub>2</sub> O-C] <sup>-</sup> , 607.2193 [M-H-C <sub>17</sub> H <sub>22</sub> O <sub>7</sub> ] <sup>-</sup> , 597.2333 [M-H-C <sub>18</sub> H <sub>20</sub> O <sub>7</sub> ] <sup>-</sup> , 583.2204 [M-H-C <sub>17</sub> H <sub>22</sub> O <sub>7</sub> -2C] <sup>-</sup> , 579.2265 [M-H-C <sub>17</sub> H <sub>22</sub> O <sub>7</sub> -2C-CO] <sup>-</sup> , 571.2001 [M-H-C <sub>17</sub> H <sub>22</sub> O <sub>7</sub> -2H <sub>2</sub> O] <sup>-</sup> , 559.1985 [M-H-C <sub>17</sub> H <sub>22</sub> O <sub>7</sub> -2H <sub>2</sub> O-C] <sup>-</sup> , 547.1966 [M-H-C <sub>17</sub> H <sub>22</sub> O <sub>7</sub> -2H <sub>2</sub> O-2C] <sup>-</sup> , 531.2022 [M-H-C <sub>17</sub> H <sub>22</sub> O <sub>7</sub> -2H <sub>2</sub> O-2C-O] <sup>-</sup> , 517.1854 [M-H-C <sub>17</sub> H <sub>22</sub> O <sub>7</sub> -2H <sub>2</sub> O-2C-O-CH <sub>2</sub> ] <sup>-</sup> , 505.1920 [M-H-C <sub>17</sub> H <sub>22</sub> O <sub>7</sub> -2H <sub>2</sub> O-3C-O-CH <sub>2</sub> ] <sup>-</sup> , 411.1458 [M-H-C <sub>27</sub> H <sub>34</sub> O <sub>11</sub> ] <sup>-</sup> , <b>401.1599</b> [M-H-C <sub>28</sub> H <sub>32</sub> O <sub>11</sub> ] <sup>-</sup> | Unknown                        | Lignans |
| 70                | 12.45 | C <sub>29</sub> H <sub>36</sub> O <sub>12</sub> | [M-H] <sup>-</sup>       | 575.2137 | 0.8  | <b>371.118</b> [M-H-acetylGlc] <sup>-</sup> , 357.1390 [M-H-acetylGlc-H <sub>2</sub> O] <sup>-</sup> , 121.0315 C <sub>7</sub> H <sub>5</sub> O <sub>2</sub>                                                                                                                                                                                                                                                                                                                                                                                                                                                                                                                                                                                                                                                                                                                                                                                                                                                                                                                                                                                                                                                                                                                                                                                                                                                                                                                                                                                                                                                                               | 4-acetylate arctiin            | Lignans |

|                   |       |                                                 |                    |          |     |                                                                                                                                                                                                                                                                                                                                                                                                                                                                                                                                                                                                                                                                                                                                                                                                                                                                                                                                                                                                                                                                                                   |             |         |
|-------------------|-------|-------------------------------------------------|--------------------|----------|-----|---------------------------------------------------------------------------------------------------------------------------------------------------------------------------------------------------------------------------------------------------------------------------------------------------------------------------------------------------------------------------------------------------------------------------------------------------------------------------------------------------------------------------------------------------------------------------------------------------------------------------------------------------------------------------------------------------------------------------------------------------------------------------------------------------------------------------------------------------------------------------------------------------------------------------------------------------------------------------------------------------------------------------------------------------------------------------------------------------|-------------|---------|
| 71 <sup>n.a</sup> | 12.57 | C <sub>50</sub> H <sub>56</sub> O <sub>17</sub> | [M-H] <sup>-</sup> | 927.3446 | 0.7 | 897.3338 [M-H-H <sub>2</sub> O-C] <sup>-</sup> , 879.3191 [M-H-2H <sub>2</sub> O-C] <sup>-</sup> , 861.3163 [M-H-3H <sub>2</sub> O-C] <sup>-</sup> , 849.3130 [M-H-3H <sub>2</sub> O-2C] <sup>-</sup> , 717.2673 [M-H-C <sub>7</sub> H <sub>14</sub> O <sub>7</sub> ] <sup>-</sup> , <b>665.2462 [M-H-C<sub>11</sub>H<sub>18</sub>O<sub>7</sub>]<sup>-</sup></b> , 653.2407 [M-H-C <sub>11</sub> H <sub>18</sub> O <sub>7</sub> -C] <sup>-</sup>                                                                                                                                                                                                                                                                                                                                                                                                                                                                                                                                                                                                                                                  | Unknown     | Lignans |
| 72 <sup>n.a</sup> | 12.66 | C <sub>40</sub> H <sub>46</sub> O <sub>14</sub> | [M-H] <sup>-</sup> | 749.2832 | 2.3 | 731.2729 [M-H-H <sub>2</sub> O] <sup>-</sup> , 717.2548 [M-H-H <sub>2</sub> O-CH <sub>2</sub> ] <sup>-</sup> , 701.2609 [M-H-2H <sub>2</sub> O-C] <sup>-</sup> , 683.2492 [M-H-2H <sub>2</sub> O-CH <sub>2</sub> O] <sup>-</sup> , 665.2360 [M-H-4H <sub>2</sub> O-C] <sup>-</sup> , 653.2383 [M-H-4H <sub>2</sub> O-2C] <sup>-</sup> , 607.2093 [M-H-C <sub>7</sub> H <sub>10</sub> O <sub>3</sub> ] <sup>-</sup> , <b>597.2381 [M-H-C<sub>8</sub>H<sub>8</sub>O<sub>3</sub>]<sup>-</sup></b> , 579.2252 [M-H-C <sub>8</sub> H <sub>8</sub> O <sub>3</sub> -H <sub>2</sub> O] <sup>-</sup> , 553.2095 [M-H-C <sub>8</sub> H <sub>8</sub> O <sub>3</sub> -H <sub>2</sub> O-C <sub>2</sub> H <sub>2</sub> ] <sup>-</sup> , 549.2150 [M-H-C <sub>8</sub> H <sub>8</sub> O <sub>3</sub> -2H <sub>2</sub> O-C] <sup>-</sup> , 531.2081 [M-H-C <sub>8</sub> H <sub>8</sub> O <sub>3</sub> -3H <sub>2</sub> O-C] <sup>-</sup> , 371.1486 C <sub>21</sub> H <sub>23</sub> O <sub>6</sub> , 165.0563 C <sub>9</sub> H <sub>9</sub> O <sub>3</sub> , 151.0418 C <sub>8</sub> H <sub>7</sub> O <sub>3</sub> | Unknown     | Lignans |
| 73 <sup>n.a</sup> | 12.70 | C <sub>50</sub> H <sub>56</sub> O <sub>17</sub> | [M-H] <sup>-</sup> | 927.3468 | 2.9 | 897.3341 [M-H-H <sub>2</sub> O-C] <sup>-</sup> , 879.3291 [M-H-2H <sub>2</sub> O-C] <sup>-</sup> , 861.3128 [M-H-3H <sub>2</sub> O-C] <sup>-</sup> , 849.3044 [M-H-3H <sub>2</sub> O-2C] <sup>-</sup> , 717.2560 [M-H-C <sub>7</sub> H <sub>14</sub> O <sub>7</sub> ] <sup>-</sup> , <b>665.2368 [M-H-C<sub>11</sub>H<sub>18</sub>O<sub>7</sub>]<sup>-</sup></b> , 653.2411 [M-H-C <sub>11</sub> H <sub>18</sub> O <sub>7</sub> -C] <sup>-</sup>                                                                                                                                                                                                                                                                                                                                                                                                                                                                                                                                                                                                                                                  | Unknown     | Lignans |
| 74                | 12.70 | C <sub>30</sub> H <sub>32</sub> O <sub>10</sub> | [M-H] <sup>-</sup> | 551.1948 | 3.1 | 535.1965 [M-H-O] <sup>-</sup> , 533.1805 [M-H-H <sub>2</sub> O] <sup>-</sup> , <b>505.1876 [M-H-H<sub>2</sub>O-CO]<sup>-</sup></b> , 411.1492 [M-H-C <sub>7</sub> H <sub>8</sub> O <sub>3</sub> ] <sup>-</sup> , 409.1315 [M-H-C <sub>7</sub> H <sub>10</sub> O <sub>3</sub> ] <sup>-</sup> , 151.0434 C <sub>8</sub> H <sub>7</sub> O <sub>3</sub>                                                                                                                                                                                                                                                                                                                                                                                                                                                                                                                                                                                                                                                                                                                                               | Arctignan B | Lignans |
| 75 <sup>n.a</sup> | 12.75 | C <sub>50</sub> H <sub>58</sub> O <sub>18</sub> | [M-H] <sup>-</sup> | 945.3549 | 0.4 | 927.3477 [M-H-H <sub>2</sub> O] <sup>-</sup> , 909.3370 [M-H-2H <sub>2</sub> O] <sup>-</sup> , 895.3121 [M-H-2H <sub>2</sub> O-CH <sub>2</sub> ] <sup>-</sup> , 701.2589 [M-H-C <sub>11</sub> H <sub>16</sub> O <sub>6</sub> ] <sup>-</sup> , 597.2343 [M-H-C <sub>18</sub> H <sub>20</sub> O <sub>7</sub> ] <sup>-</sup> , 505.1879 [M-H-C <sub>21</sub> H <sub>28</sub> O <sub>10</sub> ] <sup>-</sup> , <b>401.1604 [M-H-C<sub>28</sub>H<sub>32</sub>O<sub>11</sub>]<sup>-</sup></b>                                                                                                                                                                                                                                                                                                                                                                                                                                                                                                                                                                                                           | Unknown     | Lignans |
| 76 <sup>n.a</sup> | 12.79 | C <sub>40</sub> H <sub>46</sub> O <sub>14</sub> | [M-H] <sup>-</sup> | 749.2825 | 1.6 | 731.2772 [M-H-H <sub>2</sub> O] <sup>-</sup> , 701.2621 [M-H-2H <sub>2</sub> O-C] <sup>-</sup> , 683.2510 [M-H-2H <sub>2</sub> O-CH <sub>2</sub> O] <sup>-</sup> , 665.2330 [M-H-4H <sub>2</sub> O-C] <sup>-</sup> , 653.2362 [M-H-4H <sub>2</sub> O-2C] <sup>-</sup> , 607.2049 [M-H-C <sub>7</sub> H <sub>10</sub> O <sub>3</sub> ] <sup>-</sup> , 597.2292 [M-H-C <sub>8</sub> H <sub>8</sub> O <sub>3</sub> ] <sup>-</sup> , 553.2123 [M-H-C <sub>8</sub> H <sub>8</sub> O <sub>3</sub> -H <sub>2</sub> O-C <sub>2</sub> H <sub>2</sub> ] <sup>-</sup> , <b>521.1825 [M-H-C<sub>8</sub>H<sub>8</sub>O<sub>3</sub>-2H<sub>2</sub>O-C<sub>2</sub>H<sub>2</sub>-2C]<sup>-</sup></b> , 165.0565 C <sub>9</sub> H <sub>9</sub> O <sub>3</sub> , 151.0416 C <sub>8</sub> H <sub>7</sub> O <sub>3</sub>                                                                                                                                                                                                                                                                                              | Unknown     | Lignans |
| 77                | 12.80 | C <sub>30</sub> H <sub>32</sub> O <sub>10</sub> | [M-H] <sup>-</sup> | 551.1938 | 2.1 | 533.1797 [M-H-H <sub>2</sub> O] <sup>-</sup> , <b>505.1893 [M-H-H<sub>2</sub>O-CO]<sup>-</sup></b> , 409.1314 [M-H-C <sub>7</sub> H <sub>10</sub> O <sub>3</sub> ] <sup>-</sup> , 397.1305 [M-H-C <sub>7</sub> H <sub>10</sub> O <sub>3</sub> -C] <sup>-</sup> , 151.0404 C <sub>8</sub> H <sub>7</sub> O <sub>3</sub>                                                                                                                                                                                                                                                                                                                                                                                                                                                                                                                                                                                                                                                                                                                                                                            | Arctignan C | Lignans |
| 78 <sup>n.a</sup> | 12.94 | C <sub>50</sub> H <sub>56</sub> O <sub>17</sub> | [M-H] <sup>-</sup> | 927.3455 | 1.6 | <b>909.3322 [M-H-H<sub>2</sub>O]<sup>-</sup></b> , 897.3328 [M-H-H <sub>2</sub> O-C] <sup>-</sup> , 891.3290 [M-H-2H <sub>2</sub> O] <sup>-</sup> , 879.3211 [M-H-2H <sub>2</sub> O-C] <sup>-</sup> , 861.3118 [M-H-3H <sub>2</sub> O-C] <sup>-</sup> , 843.3008 [M-H-4H <sub>2</sub> O-C] <sup>-</sup> , 837.3062 [M-H-5H <sub>2</sub> O] <sup>-</sup> , 825.2917 [M-H-5H <sub>2</sub> O-C] <sup>-</sup> , <b>813.2915 [M-H-5H<sub>2</sub>O-2C]<sup>-</sup></b> , 719.2421 [M-H-C <sub>8</sub> H <sub>16</sub> O <sub>6</sub> ] <sup>-</sup> , 707.2502 [M-H-C <sub>8</sub> H <sub>16</sub> O <sub>6</sub> -C] <sup>-</sup> , 589.2107 [M-H-C <sub>17</sub> H <sub>22</sub> O <sub>7</sub> ] <sup>-</sup>                                                                                                                                                                                                                                                                                                                                                                                        | Unknown     | Lignans |
| 79 <sup>n.a</sup> | 13.05 | C <sub>50</sub> H <sub>56</sub> O <sub>17</sub> | [M-H] <sup>-</sup> | 927.3468 | 2.9 | <b>909.3373 [M-H-H<sub>2</sub>O]<sup>-</sup></b> , 891.3240 [M-H-2H <sub>2</sub> O] <sup>-</sup> , 879.3223 [M-H-2H <sub>2</sub> O-C] <sup>-</sup> , 861.3185 [M-H-3H <sub>2</sub> O-C] <sup>-</sup> , 843.3040 [M-H-4H <sub>2</sub> O-C] <sup>-</sup> , 837.2908 [M-H-5H <sub>2</sub> O] <sup>-</sup> , 825.2959 [M-H-5H <sub>2</sub> O-C] <sup>-</sup> , 813.2939 [M-H-5H <sub>2</sub> O-2C] <sup>-</sup> , 801.2922 [M-H-5H <sub>2</sub> O-3C] <sup>-</sup> , 719.2479 [M-H-C <sub>8</sub> H <sub>16</sub> O <sub>6</sub> ] <sup>-</sup> , 707.2469 [M-H-C <sub>8</sub> H <sub>16</sub> O <sub>6</sub> -C] <sup>-</sup> , 589.2076 [M-H-C <sub>17</sub> H <sub>22</sub> O <sub>7</sub> ] <sup>-</sup>                                                                                                                                                                                                                                                                                                                                                                                          | Unknown     | Lignans |
| 80 <sup>n.a</sup> | 13.06 | C <sub>40</sub> H <sub>44</sub> O <sub>13</sub> | [M-H] <sup>-</sup> | 731.2736 | 3.2 | 713.2542 [M-H-H <sub>2</sub> O] <sup>-</sup> , 695.2530 [M-H-2H <sub>2</sub> O] <sup>-</sup> , 683.2480 [M-H-2H <sub>2</sub> O-C] <sup>-</sup> , 677.2429 [M-H-3H <sub>2</sub> O] <sup>-</sup> , <b>665.2401 [M-H-3H<sub>2</sub>O-C]<sup>-</sup></b> , 653.2403 [M-H-3H <sub>2</sub> O-2C] <sup>-</sup> , 589.2047 [M-H-C <sub>7</sub> H <sub>10</sub> O <sub>3</sub> ] <sup>-</sup> , 571.1968 [M-H-C <sub>7</sub> H <sub>10</sub> O <sub>3</sub> -H <sub>2</sub> O] <sup>-</sup> , 559.1990 [M-H-C <sub>7</sub> H <sub>10</sub> O <sub>3</sub> -H <sub>2</sub> O-                                                                                                                                                                                                                                                                                                                                                                                                                                                                                                                               | Unknown     | Lignans |

|                   |       |                                                 |                          |          |      |                                                                                                                                                                                                                                                                                                                                                                                                                                                                                                                                                                                                                                                                                                                                                                                                                                                                                                                                                                                                                                                               |                    |         |  |
|-------------------|-------|-------------------------------------------------|--------------------------|----------|------|---------------------------------------------------------------------------------------------------------------------------------------------------------------------------------------------------------------------------------------------------------------------------------------------------------------------------------------------------------------------------------------------------------------------------------------------------------------------------------------------------------------------------------------------------------------------------------------------------------------------------------------------------------------------------------------------------------------------------------------------------------------------------------------------------------------------------------------------------------------------------------------------------------------------------------------------------------------------------------------------------------------------------------------------------------------|--------------------|---------|--|
|                   |       |                                                 |                          |          |      | C <sup>-</sup> ], 369.1319C <sub>21</sub> H <sub>21</sub> O <sub>6</sub>                                                                                                                                                                                                                                                                                                                                                                                                                                                                                                                                                                                                                                                                                                                                                                                                                                                                                                                                                                                      |                    |         |  |
| 81                | 13.10 | C <sub>30</sub> H <sub>34</sub> O <sub>10</sub> | [M-H] <sup>-</sup>       | 553.2079 | 0.5  | 519.2045 [M-H-H <sub>2</sub> O-O] <sup>-</sup> , 505.1876 [M-H-H <sub>2</sub> O-O-CH <sub>2</sub> ] <sup>-</sup> ,<br><b>357.1352 [M-H-C<sub>10</sub>H<sub>12</sub>O<sub>4</sub>]<sup>-</sup></b> , 343.1219 [M-H-C <sub>10</sub> H <sub>12</sub> O <sub>4</sub> -CH <sub>2</sub> ] <sup>-</sup> ,<br>195.0663 C <sub>10</sub> H <sub>11</sub> O <sub>4</sub> , 165.0570 C <sub>9</sub> H <sub>9</sub> O <sub>3</sub> , 151.0407 C <sub>8</sub> H <sub>7</sub> O <sub>3</sub>                                                                                                                                                                                                                                                                                                                                                                                                                                                                                                                                                                                 | Lappaol E          | Lignans |  |
| 82                | 13.12 | C <sub>31</sub> H <sub>36</sub> O <sub>10</sub> | [M-H] <sup>-</sup>       | 567.2251 | 2.1  | 535.1983 [M-H-H <sub>2</sub> O-CH <sub>2</sub> ] <sup>-</sup> , 531.2048 [M-H-2H <sub>2</sub> O] <sup>-</sup> , 519.2055<br>[M-H-2H <sub>2</sub> O-C] <sup>-</sup> , <b>505.1878 [M-H-2H<sub>2</sub>O-C-CH<sub>2</sub>]<sup>-</sup></b> , 411.1467<br>[M-H-C <sub>8</sub> H <sub>12</sub> O <sub>3</sub> ] <sup>-</sup> , 397.1608 [M-H-C <sub>8</sub> H <sub>10</sub> O <sub>4</sub> ] <sup>-</sup> , 195.0684<br>C <sub>10</sub> H <sub>11</sub> O <sub>4</sub> , 165.0574 C <sub>9</sub> H <sub>9</sub> O <sub>3</sub>                                                                                                                                                                                                                                                                                                                                                                                                                                                                                                                                     | Lappaol D          | Lignans |  |
| 83                | 13.24 | C <sub>40</sub> H <sub>44</sub> O <sub>13</sub> | [M-H] <sup>-</sup>       | 731.2704 | 0.0  | 713.2620 [M-H-H <sub>2</sub> O] <sup>-</sup> , 683.2524 [M-H-2H <sub>2</sub> O-C] <sup>-</sup> , 677.2406<br>[M-H-3H <sub>2</sub> O] <sup>-</sup> , <b>665.2405 [M-H-3H<sub>2</sub>O-C]<sup>-</sup></b> , 653.2401 [M-H-<br>3H <sub>2</sub> O-2C] <sup>-</sup> , 589.2093 [M-H-C <sub>7</sub> H <sub>10</sub> O <sub>3</sub> ] <sup>-</sup> , 571.1992 [M-H-<br>C <sub>7</sub> H <sub>10</sub> O <sub>3</sub> -H <sub>2</sub> O] <sup>-</sup> , 559.1985 [M-H-C <sub>7</sub> H <sub>10</sub> O <sub>3</sub> -H <sub>2</sub> O-C] <sup>-</sup> , 547.1989<br>[M-H-C <sub>7</sub> H <sub>10</sub> O <sub>3</sub> -H <sub>2</sub> O-2C] <sup>-</sup> , 531.2033 [M-H-C <sub>7</sub> H <sub>10</sub> O <sub>3</sub> -H <sub>2</sub> O-2C-<br>O] <sup>-</sup> , 381.1353 C <sub>22</sub> H <sub>21</sub> O <sub>6</sub> , 369.1357 C <sub>21</sub> H <sub>21</sub> O <sub>6</sub> , 297.1125<br>C <sub>18</sub> H <sub>17</sub> O <sub>4</sub> , 283.0972 C <sub>17</sub> H <sub>15</sub> O <sub>4</sub> , 269.0817 C <sub>16</sub> H <sub>13</sub> O <sub>4</sub> | Arctignan D        | Lignans |  |
| 84                | 13.29 | C <sub>40</sub> H <sub>44</sub> O <sub>13</sub> | [M-H] <sup>-</sup>       | 731.2722 | 1.8  | 713.2620 [M-H-H <sub>2</sub> O] <sup>-</sup> , 683.2505 [M-H-2H <sub>2</sub> O-C] <sup>-</sup> , 677.2407<br>[M-H-3H <sub>2</sub> O] <sup>-</sup> , <b>665.2402 [M-H-3H<sub>2</sub>O-C]<sup>-</sup></b> , 653.2402 [M-H-<br>3H <sub>2</sub> O-2C] <sup>-</sup> , 589.2103 [M-H-C <sub>7</sub> H <sub>10</sub> O <sub>3</sub> ] <sup>-</sup> , 571.1998 [M-H-<br>C <sub>7</sub> H <sub>10</sub> O <sub>3</sub> -H <sub>2</sub> O] <sup>-</sup> , 559.1996 [M-H-C <sub>7</sub> H <sub>10</sub> O <sub>3</sub> -H <sub>2</sub> O-C] <sup>-</sup> , 547.1982<br>[M-H-C <sub>7</sub> H <sub>10</sub> O <sub>3</sub> -H <sub>2</sub> O-2C] <sup>-</sup> , 381.1362 C <sub>22</sub> H <sub>21</sub> O <sub>6</sub> , 283.0973<br>C <sub>17</sub> H <sub>15</sub> O <sub>4</sub> , 269.0849 C <sub>16</sub> H <sub>13</sub> O <sub>4</sub>                                                                                                                                                                                                                            | Arctignan E        | Lignans |  |
| 85 <sup>n,a</sup> | 13.36 | C <sub>37</sub> H <sub>44</sub> O <sub>14</sub> | [M-H+HCOOH] <sup>-</sup> | 757.2730 | 2.2  | <b>549.2117 [M-H-Glc]<sup>-</sup></b> , 519.2048 [M-H-Glc-CO] <sup>-</sup> , <b>385.1299</b><br><b>[M-H-C<sub>16</sub>H<sub>22</sub>O<sub>7</sub>]<sup>-</sup></b>                                                                                                                                                                                                                                                                                                                                                                                                                                                                                                                                                                                                                                                                                                                                                                                                                                                                                            | lappaolB+Glc       | Lignans |  |
| 86*               | 13.40 | C <sub>20</sub> H <sub>22</sub> O <sub>6</sub>  | [M-H] <sup>-</sup>       | 357.1339 | 0.1  | <b>342.1113 [M-H-CH<sub>3</sub>]<sup>-</sup></b> , 313.1397 [M-H-CO <sub>2</sub> ] <sup>-</sup> , 221.0824 [M-<br>H-C <sub>8</sub> H <sub>8</sub> O <sub>2</sub> ] <sup>-</sup> , 209.0840 [M-H-C <sub>8</sub> H <sub>8</sub> O <sub>2</sub> -C] <sup>-</sup> , 161.0561 C <sub>10</sub> H <sub>9</sub> O <sub>2</sub> ,<br>147.0455 C <sub>9</sub> H <sub>7</sub> O <sub>2</sub> , 137.0598 C <sub>8</sub> H <sub>9</sub> O <sub>2</sub>                                                                                                                                                                                                                                                                                                                                                                                                                                                                                                                                                                                                                     | Matairesinol       | Lignans |  |
| 87 <sup>n</sup>   | 13.64 | C <sub>40</sub> H <sub>44</sub> O <sub>13</sub> | [M-H] <sup>-</sup>       | 731.2705 | 0.1  | 713.2582 [M-H-H <sub>2</sub> O] <sup>-</sup> , 701.2607 [M-H-H <sub>2</sub> O-C] <sup>-</sup> , 683.2511 [M-<br>H-2H <sub>2</sub> O-C] <sup>-</sup> , 677.2402 [M-H-3H <sub>2</sub> O] <sup>-</sup> , <b>665.2399 [M-H-3H<sub>2</sub>O-<br/>C]<sup>-</sup></b> , 653.2388 [M-H-3H <sub>2</sub> O-2C] <sup>-</sup> , 589.2103 [M-H-C <sub>7</sub> H <sub>10</sub> O <sub>3</sub> ] <sup>-</sup> ,<br>571.1971 [M-H-C <sub>7</sub> H <sub>10</sub> O <sub>3</sub> -H <sub>2</sub> O] <sup>-</sup> , 559.1985 [M-H-C <sub>7</sub> H <sub>10</sub> O <sub>3</sub> -<br>H <sub>2</sub> O-C] <sup>-</sup> , 547.1985 [M-H-C <sub>7</sub> H <sub>10</sub> O <sub>3</sub> -H <sub>2</sub> O-2C] <sup>-</sup> , 505.1901[M-H-<br>C <sub>7</sub> H <sub>10</sub> O <sub>3</sub> -2H <sub>2</sub> O-4C] <sup>-</sup> , 283.0889 C <sub>17</sub> H <sub>15</sub> O <sub>4</sub>                                                                                                                                                                                           | Arctignan H isomer | Lignans |  |
| 88                | 14.02 | C <sub>40</sub> H <sub>42</sub> O <sub>13</sub> | [M-H] <sup>-</sup>       | 729.2568 | 2.1  | 711.2444 [M-H-H <sub>2</sub> O] <sup>-</sup> , 699.2462 [M-H-H <sub>2</sub> O-C] <sup>-</sup> , 681.2343 [M-<br>H-2H <sub>2</sub> O-C] <sup>-</sup> , 669.2336 [M-H-2H <sub>2</sub> O-2C] <sup>-</sup> , 663.2287 [M-H-<br>3H <sub>2</sub> O-C] <sup>-</sup> , 651.2331 [M-H-3H <sub>2</sub> O-2C] <sup>-</sup> , 557.1816 [M-H-<br>C <sub>8</sub> H <sub>12</sub> O <sub>4</sub> ] <sup>-</sup> , 545.1883 [M-H-C <sub>8</sub> H <sub>8</sub> O <sub>5</sub> ] <sup>-</sup> , 517.1910 [M-H-<br>C <sub>10</sub> H <sub>12</sub> O <sub>5</sub> ] <sup>-</sup> , <b>505.1897 [M-H-C<sub>10</sub>H<sub>12</sub>O<sub>5</sub>-C]<sup>-</sup></b> , 415.1454 [M-H-<br>C <sub>14</sub> H <sub>18</sub> O <sub>8</sub> ] <sup>-</sup> , 283.0960 C <sub>17</sub> H <sub>15</sub> O <sub>4</sub> , 269.0805 C <sub>16</sub> H <sub>13</sub> O <sub>4</sub>                                                                                                                                                                                                          | Arctignan F        | Lignans |  |
| 89 <sup>n,a</sup> | 14.08 | C <sub>31</sub> H <sub>34</sub> O <sub>10</sub> | [M-H] <sup>-</sup>       | 565.2117 | 4.3  | 441.1544 [M-H-CH <sub>2</sub> O] <sup>-</sup> , 423.1431 [M-H-C <sub>7</sub> H <sub>10</sub> O <sub>3</sub> ] <sup>-</sup> , <b>411.1470</b><br><b>[M-H-C<sub>7</sub>H<sub>10</sub>O<sub>3</sub>-C]<sup>-</sup></b>                                                                                                                                                                                                                                                                                                                                                                                                                                                                                                                                                                                                                                                                                                                                                                                                                                           | Unknown            | Lignans |  |
| 90 <sup>n</sup>   | 14.15 | C <sub>40</sub> H <sub>42</sub> O <sub>13</sub> | [M-H] <sup>-</sup>       | 729.2573 | 2.6  | 711.2453 [M-H-H <sub>2</sub> O] <sup>-</sup> , 701.2621 [M-H-CO] <sup>-</sup> , 681.2374 [M-H-<br>2H <sub>2</sub> O-C] <sup>-</sup> , 669.2408 [M-H-2H <sub>2</sub> O-2C] <sup>-</sup> , 557.1811 [M-H-<br>C <sub>8</sub> H <sub>12</sub> O <sub>4</sub> ] <sup>-</sup> , 545.1851 [M-H-C <sub>8</sub> H <sub>8</sub> O <sub>5</sub> ] <sup>-</sup> , <b>517.1887 [M-H-<br/>C<sub>10</sub>H<sub>12</sub>O<sub>5</sub>]<sup>-</sup></b> , 505.1899[M-H-C <sub>10</sub> H <sub>12</sub> O <sub>5</sub> -C] <sup>-</sup> , 415.1427 [M-H-<br>C <sub>14</sub> H <sub>18</sub> O <sub>8</sub> ] <sup>-</sup> , 283.0966 C <sub>17</sub> H <sub>15</sub> O <sub>4</sub>                                                                                                                                                                                                                                                                                                                                                                                             | Herpetetrone       | Lignans |  |
| 91                | 14.21 | C <sub>40</sub> H <sub>44</sub> O <sub>13</sub> | [M-H] <sup>-</sup>       | 731.2698 | -0.6 | 713.2633 [M-H-H <sub>2</sub> O] <sup>-</sup> , <b>701.2632[M-H-H<sub>2</sub>O-C]<sup>-</sup></b> , 683.2512[M-<br>H-2H <sub>2</sub> O-C] <sup>-</sup> , 665.2419 [M-H-3H <sub>2</sub> O-C] <sup>-</sup> , 653.2443 [M-H-                                                                                                                                                                                                                                                                                                                                                                                                                                                                                                                                                                                                                                                                                                                                                                                                                                      | Arctignan G        | Lignans |  |

|                    |       |                                                 |                    |          |     |                                                                                                                                                                                                                                                                                                                                                                                                                                                                                                                                                                                                                                                                                                                                                                                                                                                                                                                                                                                                                                                                                                                   |                             |         |
|--------------------|-------|-------------------------------------------------|--------------------|----------|-----|-------------------------------------------------------------------------------------------------------------------------------------------------------------------------------------------------------------------------------------------------------------------------------------------------------------------------------------------------------------------------------------------------------------------------------------------------------------------------------------------------------------------------------------------------------------------------------------------------------------------------------------------------------------------------------------------------------------------------------------------------------------------------------------------------------------------------------------------------------------------------------------------------------------------------------------------------------------------------------------------------------------------------------------------------------------------------------------------------------------------|-----------------------------|---------|
| 92 <sup>n,a</sup>  | 14.25 | C <sub>31</sub> H <sub>34</sub> O <sub>10</sub> | [M-H] <sup>-</sup> | 565.2089 | 1.5 | 3H <sub>2</sub> O-2C], <b>517.1887</b> [M-H-C <sub>10</sub> H <sub>14</sub> O <sub>5</sub> ] <sup>-</sup> , 505.1878 [M-H-C <sub>10</sub> H <sub>14</sub> O <sub>5</sub> -C] <sup>-</sup> , 283.0968 C <sub>17</sub> H <sub>15</sub> O <sub>4</sub> , 269.0761 C <sub>16</sub> H <sub>13</sub> O <sub>4</sub> , 195.0677 C <sub>10</sub> H <sub>11</sub> O <sub>4</sub> , 165.0569 C <sub>9</sub> H <sub>9</sub> O <sub>3</sub>                                                                                                                                                                                                                                                                                                                                                                                                                                                                                                                                                                                                                                                                                   | Unknown                     | Lignans |
| 93 <sup>n,a</sup>  | 14.28 | C <sub>41</sub> H <sub>46</sub> O <sub>13</sub> | [M-H] <sup>-</sup> | 745.2889 | 2.9 | <b>533.1855</b> [M-H-H <sub>2</sub> O-CH <sub>2</sub> ] <sup>-</sup> , 195.0680 C <sub>10</sub> H <sub>11</sub> O <sub>4</sub> , 165.0573 C <sub>9</sub> H <sub>9</sub> O <sub>3</sub><br>715.2682 [M-H-CH <sub>2</sub> O] <sup>-</sup> , 697.2602 [M-H-CH <sub>2</sub> O-H <sub>2</sub> O] <sup>-</sup> , 679.2489 [M-H-CH <sub>2</sub> O-2H <sub>2</sub> O] <sup>-</sup> , <b>357.1341</b> [M-H-C <sub>21</sub> H <sub>24</sub> O <sub>7</sub> ] <sup>-</sup> , 343.117 5[M-H-C <sub>21</sub> H <sub>24</sub> O <sub>7</sub> -CH <sub>2</sub> ] <sup>-</sup> , 313.1090 [M-H-C <sub>21</sub> H <sub>24</sub> O <sub>7</sub> -CH <sub>2</sub> -CH <sub>2</sub> O] <sup>-</sup> , 299.0938 [M-H-C <sub>21</sub> H <sub>24</sub> O <sub>7</sub> -2CH <sub>2</sub> -CH <sub>2</sub> O] <sup>-</sup><br>519.2019 [M-H-2H <sub>2</sub> O-C] <sup>-</sup> , 517.1876 [M-H-2H <sub>2</sub> O-CH <sub>2</sub> ] <sup>-</sup> , <b>505.1916</b> [M-H-2H <sub>2</sub> O-CH <sub>2</sub> -C] <sup>-</sup> , 195.0666 C <sub>10</sub> H <sub>11</sub> O <sub>4</sub> , 165.0569 C <sub>9</sub> H <sub>9</sub> O <sub>3</sub> | Unknown                     | Lignans |
| 94 <sup>n,a</sup>  | 14.41 | C <sub>31</sub> H <sub>36</sub> O <sub>10</sub> | [M-H] <sup>-</sup> | 567.2259 | 2.9 | <b>505.1916</b> [M-H-2H <sub>2</sub> O-CH <sub>2</sub> -C] <sup>-</sup> , 195.0666 C <sub>10</sub> H <sub>11</sub> O <sub>4</sub> , 165.0569 C <sub>9</sub> H <sub>9</sub> O <sub>3</sub><br>713.2590 [M-H-H <sub>2</sub> O] <sup>-</sup> , <b>701.2591</b> [M-H-H <sub>2</sub> O-C] <sup>-</sup> , 683.2518 [M-H-2H <sub>2</sub> O-C] <sup>-</sup> , 653.2387 [M-H-3H <sub>2</sub> O-2C] <sup>-</sup> , 517.1902 [M-H-C <sub>10</sub> H <sub>14</sub> O <sub>5</sub> ] <sup>-</sup> , <b>505.1855</b> [M-H-C <sub>10</sub> H <sub>14</sub> O <sub>5</sub> -C] <sup>-</sup> , 283.1042 C <sub>17</sub> H <sub>15</sub> O <sub>4</sub> , 195.0679 C <sub>10</sub> H <sub>11</sub> O <sub>4</sub> , 165.0565 C <sub>9</sub> H <sub>9</sub> O <sub>3</sub>                                                                                                                                                                                                                                                                                                                                                           | Lappaol D isomer 1          | Lignans |
| 95                 | 14.51 | C <sub>40</sub> H <sub>44</sub> O <sub>13</sub> | [M-H] <sup>-</sup> | 731.2709 | 0.5 | 553.2089 [M-H-CH <sub>2</sub> ] <sup>-</sup> , 549.2127 [M-H-H <sub>2</sub> O] <sup>-</sup> , 531.2034 [M-H-2H <sub>2</sub> O] <sup>-</sup> , 519.2059 [M-H-2H <sub>2</sub> O-C] <sup>-</sup> , 505.1860 [M-H-2H <sub>2</sub> O-C-CH <sub>2</sub> ] <sup>-</sup> , 411.1432 [M-H-C <sub>8</sub> H <sub>12</sub> O <sub>3</sub> ] <sup>-</sup> , 401.1594 [M-H-C <sub>9</sub> H <sub>10</sub> O <sub>3</sub> ] <sup>-</sup> , <b>383.1515</b> [M-H-C <sub>9</sub> H <sub>10</sub> O <sub>3</sub> -H <sub>2</sub> O] <sup>-</sup> , 371.1532 [M-H-C <sub>9</sub> H <sub>10</sub> O <sub>3</sub> -H <sub>2</sub> O-C] <sup>-</sup> , 165.0559 C <sub>9</sub> H <sub>9</sub> O <sub>3</sub>                                                                                                                                                                                                                                                                                                                                                                                                                           | Arctignan H                 | Lignans |
| 96 <sup>n,a</sup>  | 14.52 | C <sub>31</sub> H <sub>36</sub> O <sub>10</sub> | [M-H] <sup>-</sup> | 567.2258 | 2.8 | 517.1887 [M-H-H <sub>2</sub> O] <sup>-</sup> , <b>505.1882</b> [M-H-H <sub>2</sub> O-C] <sup>-</sup> , 475.1490 [M-H-H <sub>2</sub> O-3CH <sub>2</sub> ] <sup>-</sup> , 283.0989 C <sub>17</sub> H <sub>15</sub> O <sub>4</sub> , 269.0843 C <sub>16</sub> H <sub>13</sub> O <sub>4</sub><br>517.1884 [M-H-H <sub>2</sub> O] <sup>-</sup> , <b>505.1893</b> [M-H-H <sub>2</sub> O-C] <sup>-</sup> , 475.1647 [M-H-H <sub>2</sub> O-3CH <sub>2</sub> ] <sup>-</sup> , 381.1360 [M-H-C <sub>8</sub> H <sub>10</sub> O <sub>3</sub> ] <sup>-</sup> , 282.0918 C <sub>17</sub> H <sub>14</sub> O <sub>4</sub> , 270.0905 C <sub>16</sub> H <sub>14</sub> O <sub>4</sub>                                                                                                                                                                                                                                                                                                                                                                                                                                               | Lappaol D isomer 2          | Lignans |
| 97                 | 14.74 | C <sub>30</sub> H <sub>32</sub> O <sub>9</sub>  | [M-H] <sup>-</sup> | 535.1975 | 0.7 | 517.1885 [M-H-H <sub>2</sub> O] <sup>-</sup> , <b>505.1914</b> [M-H-H <sub>2</sub> O-C] <sup>-</sup> , 475.1573 [M-H-H <sub>2</sub> O-3CH <sub>2</sub> ] <sup>-</sup> , 283.0939 C <sub>17</sub> H <sub>15</sub> O <sub>4</sub> , 269.0769 C <sub>16</sub> H <sub>13</sub> O <sub>4</sub><br>517.1925 [M-H-H <sub>2</sub> O] <sup>-</sup> , <b>505.1894</b> [M-H-H <sub>2</sub> O-C] <sup>-</sup> , 475.1506 [M-H-H <sub>2</sub> O-3CH <sub>2</sub> ] <sup>-</sup> , 381.1313 [M-H-C <sub>8</sub> H <sub>10</sub> O <sub>3</sub> ] <sup>-</sup> , 282.0913 C <sub>17</sub> H <sub>14</sub> O <sub>4</sub>                                                                                                                                                                                                                                                                                                                                                                                                                                                                                                         | Isolappaol A                | Lignans |
| 98                 | 14.83 | C <sub>30</sub> H <sub>32</sub> O <sub>9</sub>  | [M-H] <sup>-</sup> | 535.1979 | 1.1 | 517.1885 [M-H-H <sub>2</sub> O] <sup>-</sup> , <b>505.1914</b> [M-H-H <sub>2</sub> O-C] <sup>-</sup> , 475.1573 [M-H-H <sub>2</sub> O-3CH <sub>2</sub> ] <sup>-</sup> , 283.0939 C <sub>17</sub> H <sub>15</sub> O <sub>4</sub> , 269.0769 C <sub>16</sub> H <sub>13</sub> O <sub>4</sub><br>517.1925 [M-H-H <sub>2</sub> O] <sup>-</sup> , <b>505.1894</b> [M-H-H <sub>2</sub> O-C] <sup>-</sup> , 475.1506 [M-H-H <sub>2</sub> O-3CH <sub>2</sub> ] <sup>-</sup> , 381.1313 [M-H-C <sub>8</sub> H <sub>10</sub> O <sub>3</sub> ] <sup>-</sup> , 282.0913 C <sub>17</sub> H <sub>14</sub> O <sub>4</sub>                                                                                                                                                                                                                                                                                                                                                                                                                                                                                                         | Lappaol A                   | Lignans |
| 99 <sup>n</sup>    | 15.03 | C <sub>30</sub> H <sub>32</sub> O <sub>9</sub>  | [M-H] <sup>-</sup> | 535.1995 | 2.7 | 517.1885 [M-H-H <sub>2</sub> O] <sup>-</sup> , <b>505.1914</b> [M-H-H <sub>2</sub> O-C] <sup>-</sup> , 475.1573 [M-H-H <sub>2</sub> O-3CH <sub>2</sub> ] <sup>-</sup> , 283.0939 C <sub>17</sub> H <sub>15</sub> O <sub>4</sub> , 269.0769 C <sub>16</sub> H <sub>13</sub> O <sub>4</sub><br>517.1925 [M-H-H <sub>2</sub> O] <sup>-</sup> , <b>505.1894</b> [M-H-H <sub>2</sub> O-C] <sup>-</sup> , 475.1506 [M-H-H <sub>2</sub> O-3CH <sub>2</sub> ] <sup>-</sup> , 381.1313 [M-H-C <sub>8</sub> H <sub>10</sub> O <sub>3</sub> ] <sup>-</sup> , 282.0913 C <sub>17</sub> H <sub>14</sub> O <sub>4</sub>                                                                                                                                                                                                                                                                                                                                                                                                                                                                                                         | Hedyotol A                  | Lignans |
| 100 <sup>n,a</sup> | 15.12 | C <sub>30</sub> H <sub>32</sub> O <sub>9</sub>  | [M-H] <sup>-</sup> | 535.1992 | 2.4 | 517.1885 [M-H-H <sub>2</sub> O] <sup>-</sup> , <b>505.1914</b> [M-H-H <sub>2</sub> O-C] <sup>-</sup> , 475.1573 [M-H-H <sub>2</sub> O-3CH <sub>2</sub> ] <sup>-</sup> , 283.0939 C <sub>17</sub> H <sub>15</sub> O <sub>4</sub> , 269.0769 C <sub>16</sub> H <sub>13</sub> O <sub>4</sub><br>517.1925 [M-H-H <sub>2</sub> O] <sup>-</sup> , <b>505.1894</b> [M-H-H <sub>2</sub> O-C] <sup>-</sup> , 475.1506 [M-H-H <sub>2</sub> O-3CH <sub>2</sub> ] <sup>-</sup> , 381.1313 [M-H-C <sub>8</sub> H <sub>10</sub> O <sub>3</sub> ] <sup>-</sup> , 282.0913 C <sub>17</sub> H <sub>14</sub> O <sub>4</sub>                                                                                                                                                                                                                                                                                                                                                                                                                                                                                                         | LappaolA isomer             | Lignans |
| 101                | 15.13 | C <sub>21</sub> H <sub>22</sub> O <sub>6</sub>  | [M-H] <sup>-</sup> | 369.1352 | 1.4 | 354.1135 [M-H-CH <sub>3</sub> ] <sup>-</sup> , 203.0376 C <sub>11</sub> H <sub>7</sub> O <sub>4</sub> , <b>174.0708</b> C <sub>11</sub> H <sub>10</sub> O <sub>2</sub><br>357.1280 [M-H-H <sub>2</sub> O] <sup>-</sup> , 255.0606 C <sub>15</sub> H <sub>11</sub> O <sub>4</sub> , 235.0959 C <sub>13</sub> H <sub>15</sub> O <sub>4</sub> , 203.0382 C <sub>11</sub> H <sub>7</sub> O <sub>4</sub> , 174.0697 C <sub>11</sub> H <sub>10</sub> O <sub>2</sub> , <b>121.0314</b> C <sub>7</sub> H <sub>5</sub> O <sub>2</sub>                                                                                                                                                                                                                                                                                                                                                                                                                                                                                                                                                                                      | 7,8-didehydroarctigenin     | Lignans |
| 102*               | 15.15 | C <sub>21</sub> H <sub>24</sub> O <sub>6</sub>  | [M-H] <sup>-</sup> | 371.1503 | 0.8 | 727.2732 [M-H-H <sub>2</sub> O] <sup>-</sup> , 715.2813 [M-H-CH <sub>2</sub> O] <sup>-</sup> , 697.2618 [M-H-CH <sub>2</sub> O-H <sub>2</sub> O] <sup>-</sup> , 677.2297 [M-H-CH <sub>2</sub> O-2H <sub>2</sub> O-2H] <sup>-</sup> , 667.2585 [M-H-3H <sub>2</sub> O-2CH <sub>2</sub> ] <sup>-</sup> , 531.1987 [M-H-C <sub>10</sub> H <sub>14</sub> O <sub>5</sub> ] <sup>-</sup> , <b>519.2054</b> [M-H-C <sub>10</sub> H <sub>14</sub> O <sub>5</sub> -C] <sup>-</sup> , 325.1098 [M-H-C <sub>22</sub> H <sub>28</sub> O <sub>8</sub> ] <sup>-</sup> , 313.1075 [M-H-C <sub>22</sub> H <sub>28</sub> O <sub>8</sub> -C] <sup>-</sup> , 195.0658 C <sub>10</sub> H <sub>11</sub> O <sub>4</sub> , 165.0538 C <sub>9</sub> H <sub>9</sub> O <sub>3</sub>                                                                                                                                                                                                                                                                                                                                                         | Arctigenin                  | Lignans |
| 103 <sup>n,a</sup> | 15.49 | C <sub>41</sub> H <sub>46</sub> O <sub>13</sub> | [M-H] <sup>-</sup> | 745.2889 | 1.7 | <b>531.2008</b> [M-H-H <sub>2</sub> O <sub>2</sub> ] <sup>-</sup> , 519.2096 [M-H-H <sub>2</sub> O <sub>2</sub> -C] <sup>-</sup> , 397.1608 [M-H-C <sub>8</sub> H <sub>8</sub> O <sub>4</sub> ] <sup>-</sup><br>695.2497 [M-H-H <sub>2</sub> O] <sup>-</sup> , 683.2524 [M-H-H <sub>2</sub> O-C] <sup>-</sup> , 677.2398 [M-H-2H <sub>2</sub> O] <sup>-</sup> , <b>665.2401</b> [M-H-2H <sub>2</sub> O-C] <sup>-</sup> , 653.2405 [M-H-2H <sub>2</sub> O-2C] <sup>-</sup> , 635.1975 [M-H-2H <sub>2</sub> O-3CH <sub>2</sub> ] <sup>-</sup> , 623.1991 [M-H-2H <sub>2</sub> O-3CH <sub>2</sub> -C] <sup>-</sup> , 559.1965 [M-H-C <sub>8</sub> H <sub>10</sub> O <sub>3</sub> ] <sup>-</sup> , 547.1978 [M-H-C <sub>8</sub> H <sub>10</sub> O <sub>3</sub> -C] <sup>-</sup> , 381.1340 [M-H-C <sub>18</sub> H <sub>20</sub> O <sub>6</sub> ] <sup>-</sup> , 369.1329 [M-H-                                                                                                                                                                                                                                        | Arctignan G+CH <sub>2</sub> | Lignans |
| 104 <sup>n</sup>   | 15.53 | C <sub>31</sub> H <sub>34</sub> O <sub>10</sub> | [M-H] <sup>-</sup> | 565.2094 | 2.0 | 695.2497 [M-H-H <sub>2</sub> O] <sup>-</sup> , 683.2524 [M-H-H <sub>2</sub> O-C] <sup>-</sup> , 677.2398 [M-H-2H <sub>2</sub> O] <sup>-</sup> , <b>665.2401</b> [M-H-2H <sub>2</sub> O-C] <sup>-</sup> , 653.2405 [M-H-2H <sub>2</sub> O-2C] <sup>-</sup> , 635.1975 [M-H-2H <sub>2</sub> O-3CH <sub>2</sub> ] <sup>-</sup> , 623.1991 [M-H-2H <sub>2</sub> O-3CH <sub>2</sub> -C] <sup>-</sup> , 559.1965 [M-H-C <sub>8</sub> H <sub>10</sub> O <sub>3</sub> ] <sup>-</sup> , 547.1978 [M-H-C <sub>8</sub> H <sub>10</sub> O <sub>3</sub> -C] <sup>-</sup> , 381.1340 [M-H-C <sub>18</sub> H <sub>20</sub> O <sub>6</sub> ] <sup>-</sup> , 369.1329 [M-H-                                                                                                                                                                                                                                                                                                                                                                                                                                                        | 2-Hydroxylappaol B          | Lignans |
| 105                | 15.62 | C <sub>40</sub> H <sub>42</sub> O <sub>12</sub> | [M-H] <sup>-</sup> | 713.2612 | 1.4 | 695.2497 [M-H-H <sub>2</sub> O] <sup>-</sup> , 683.2524 [M-H-H <sub>2</sub> O-C] <sup>-</sup> , 677.2398 [M-H-2H <sub>2</sub> O] <sup>-</sup> , <b>665.2401</b> [M-H-2H <sub>2</sub> O-C] <sup>-</sup> , 653.2405 [M-H-2H <sub>2</sub> O-2C] <sup>-</sup> , 635.1975 [M-H-2H <sub>2</sub> O-3CH <sub>2</sub> ] <sup>-</sup> , 623.1991 [M-H-2H <sub>2</sub> O-3CH <sub>2</sub> -C] <sup>-</sup> , 559.1965 [M-H-C <sub>8</sub> H <sub>10</sub> O <sub>3</sub> ] <sup>-</sup> , 547.1978 [M-H-C <sub>8</sub> H <sub>10</sub> O <sub>3</sub> -C] <sup>-</sup> , 381.1340 [M-H-C <sub>18</sub> H <sub>20</sub> O <sub>6</sub> ] <sup>-</sup> , 369.1329 [M-H-                                                                                                                                                                                                                                                                                                                                                                                                                                                        | Lappaol F                   | Lignans |



|                    |       |                                                 |                                   |          |      |                                                                                                                                                                                                                                                                                                                                                                                                                                                                                                                                                                                                                                                                                                                                                                                                                                                                                                                                                                                                                                                                                                                            |                               |         |  |
|--------------------|-------|-------------------------------------------------|-----------------------------------|----------|------|----------------------------------------------------------------------------------------------------------------------------------------------------------------------------------------------------------------------------------------------------------------------------------------------------------------------------------------------------------------------------------------------------------------------------------------------------------------------------------------------------------------------------------------------------------------------------------------------------------------------------------------------------------------------------------------------------------------------------------------------------------------------------------------------------------------------------------------------------------------------------------------------------------------------------------------------------------------------------------------------------------------------------------------------------------------------------------------------------------------------------|-------------------------------|---------|--|
|                    |       |                                                 |                                   |          |      | C <sub>18</sub> H <sub>20</sub> O <sub>6</sub> -C] <sup>-</sup> , 295.0965 C <sub>18</sub> H <sub>15</sub> O <sub>4</sub> , 283.0976 C <sub>17</sub> H <sub>15</sub> O <sub>4</sub> , 269.0800 C <sub>16</sub> H <sub>13</sub> O <sub>4</sub>                                                                                                                                                                                                                                                                                                                                                                                                                                                                                                                                                                                                                                                                                                                                                                                                                                                                              |                               |         |  |
| 106 <sup>n.a</sup> | 15.92 | C <sub>40</sub> H <sub>42</sub> O <sub>12</sub> | [M-H] <sup>-</sup>                | 713.2585 | -1.0 | 695.2422 [M-H-H <sub>2</sub> O] <sup>-</sup> , 683.2530 [M-H-H <sub>2</sub> O-C] <sup>-</sup> , 677.2423 [M-H-2H <sub>2</sub> O] <sup>-</sup> , <b>665.2425</b> [M-H-2H <sub>2</sub> O-C] <sup>-</sup> , 653.2393 [M-H-2H <sub>2</sub> O-2C] <sup>-</sup> , 635.1962 [M-H-2H <sub>2</sub> O-3CH <sub>2</sub> ] <sup>-</sup> , 623.1805 [M-H-2H <sub>2</sub> O-3CH <sub>2</sub> -C] <sup>-</sup> , 561.2067 [M-H-C <sub>8</sub> H <sub>8</sub> O <sub>3</sub> ] <sup>-</sup> , 559.1877 [M-H-C <sub>8</sub> H <sub>10</sub> O <sub>3</sub> ] <sup>-</sup> , 547.1923 [M-H-C <sub>8</sub> H <sub>10</sub> O <sub>3</sub> -C] <sup>-</sup> , 295.0545 C <sub>18</sub> H <sub>15</sub> O <sub>4</sub>                                                                                                                                                                                                                                                                                                                                                                                                                          | Lappaol F isomer              | Lignans |  |
| 107                | 16.09 | C <sub>31</sub> H <sub>34</sub> O <sub>9</sub>  | [M-H] <sup>-</sup>                | 549.2154 | 2.9  | 531.2045 [M-H-H <sub>2</sub> O] <sup>-</sup> , <b>519.2037</b> [M-H-H <sub>2</sub> O-C] <sup>-</sup> , 489.1574 [M-H-H <sub>2</sub> O-3CH <sub>2</sub> ] <sup>-</sup> , 283.0963 C <sub>17</sub> H <sub>15</sub> O <sub>4</sub> , 269.0837 C <sub>16</sub> H <sub>13</sub> O <sub>4</sub>                                                                                                                                                                                                                                                                                                                                                                                                                                                                                                                                                                                                                                                                                                                                                                                                                                  | Lappaol B                     | Lignans |  |
| 108 <sup>n.a</sup> | 16.35 | C <sub>48</sub> H <sub>56</sub> O <sub>17</sub> | [M-H] <sup>-</sup>                | 903.3448 | 0.9  | 743.3075 [M+H-Glc] <sup>+</sup> , 725.2974 [M+H-Glc-H <sub>2</sub> O] <sup>+</sup> , 531.2089[M+H-Glc-C <sub>11</sub> H <sub>16</sub> O <sub>4</sub> ] <sup>+</sup> , 507.2070 [M+H-Glc-C <sub>13</sub> H <sub>16</sub> O <sub>4</sub> ] <sup>+</sup> , 489.1970 [M+H-Glc-C <sub>13</sub> H <sub>16</sub> O <sub>4</sub> -H <sub>2</sub> O] <sup>+</sup> , 371.1369 [M+H-Glc-C <sub>21</sub> H <sub>24</sub> O <sub>6</sub> ] <sup>+</sup> , 335.1316 [M+H-Glc-C <sub>21</sub> H <sub>24</sub> O <sub>6</sub> -2H <sub>2</sub> O] <sup>+</sup> , 285.1158 C <sub>17</sub> H <sub>17</sub> O <sub>4</sub> , 176.0862 C <sub>11</sub> H <sub>12</sub> O <sub>2</sub> , <b>151.0781</b> C <sub>9</sub> H <sub>11</sub> O <sub>2</sub>                                                                                                                                                                                                                                                                                                                                                                                         | NeoarctinA+Glc                | Lignans |  |
| 109 <sup>n.a</sup> | 16.46 | C <sub>48</sub> H <sub>54</sub> O <sub>17</sub> | [M+NH <sub>4</sub> ] <sup>+</sup> | 920.3708 | 0.3  | <b>741.2930</b> [M+H-Glc] <sup>+</sup> , 723.2812 [M+H-Glc-H <sub>2</sub> O] <sup>+</sup> , 505.1924 [M+H-Glc-C <sub>13</sub> H <sub>16</sub> O <sub>4</sub> ] <sup>+</sup> , 247.0989 C <sub>14</sub> H <sub>15</sub> O <sub>4</sub> , 203.0999 C <sub>13</sub> H <sub>15</sub> O <sub>2</sub> , <b>151.0753</b> C <sub>9</sub> H <sub>11</sub> O <sub>2</sub>                                                                                                                                                                                                                                                                                                                                                                                                                                                                                                                                                                                                                                                                                                                                                            | Neoarctin A-2H+Glc            | Lignans |  |
| 110 <sup>n.a</sup> | 16.62 | C <sub>48</sub> H <sub>56</sub> O <sub>17</sub> | [M+Na] <sup>+</sup>               | 927.3460 | 4.5  | <b>743.3107</b> [M+H-Glc] <sup>+</sup> , 725.2971 [M+H-Glc-H <sub>2</sub> O] <sup>+</sup> , 711.2950 [M+H-Glc-H <sub>2</sub> O-CH <sub>2</sub> ] <sup>+</sup> , 507.2085 [M+H-Glc-C <sub>13</sub> H <sub>16</sub> O <sub>4</sub> ] <sup>+</sup> , 489.1880 [M+H-Glc-C <sub>13</sub> H <sub>16</sub> O <sub>4</sub> -H <sub>2</sub> O] <sup>+</sup> , 285.1181 C <sub>17</sub> H <sub>17</sub> O <sub>4</sub> , 247.0996 C <sub>14</sub> H <sub>15</sub> O <sub>4</sub> , 177.0902 C <sub>11</sub> H <sub>13</sub> O <sub>2</sub> , 151.0727 C <sub>9</sub> H <sub>11</sub> O <sub>2</sub>                                                                                                                                                                                                                                                                                                                                                                                                                                                                                                                                  | Diarctigenin+Glc              | Lignans |  |
| 111 <sup>n.a</sup> | 17.03 | C <sub>40</sub> H <sub>42</sub> O <sub>12</sub> | [M-H] <sup>-</sup>                | 713.2594 | -0.4 | <b>697.2672</b> [M+H-H <sub>2</sub> O] <sup>+</sup> , 679.2571 [M+H-2H <sub>2</sub> O] <sup>+</sup> , 665.2425 [M+H-2H <sub>2</sub> O-CH <sub>2</sub> ] <sup>+</sup> , 561.2168 [M+H-C <sub>8</sub> H <sub>10</sub> O <sub>3</sub> ] <sup>+</sup> , 543.2048 [M+H-C <sub>8</sub> H <sub>10</sub> O <sub>3</sub> -H <sub>2</sub> O] <sup>+</sup> , 531.1977 [M+H-C <sub>8</sub> H <sub>10</sub> O <sub>3</sub> -H <sub>2</sub> O-C] <sup>+</sup>                                                                                                                                                                                                                                                                                                                                                                                                                                                                                                                                                                                                                                                                            | Unknown                       | Lignans |  |
| 112 <sup>n.a</sup> | 17.14 | C <sub>40</sub> H <sub>42</sub> O <sub>12</sub> | [M-H] <sup>-</sup>                | 713.2596 | -0.2 | <b>697.2721</b> [M+H-H <sub>2</sub> O] <sup>+</sup> , 679.2600[M+H-2H <sub>2</sub> O] <sup>+</sup> , 665.2600 [M+H-2H <sub>2</sub> O-CH <sub>2</sub> ] <sup>+</sup> , 561.2126 [M+H-C <sub>8</sub> H <sub>10</sub> O <sub>3</sub> ] <sup>+</sup> , 543.1943 [M+H-C <sub>8</sub> H <sub>10</sub> O <sub>3</sub> -H <sub>2</sub> O] <sup>+</sup> , 531.2034 [M+H-C <sub>8</sub> H <sub>10</sub> O <sub>3</sub> -H <sub>2</sub> O-C] <sup>+</sup>                                                                                                                                                                                                                                                                                                                                                                                                                                                                                                                                                                                                                                                                             | Unknown                       | Lignans |  |
| 113 <sup>n</sup>   | 18.98 | C <sub>42</sub> H <sub>44</sub> O <sub>12</sub> | [M-H] <sup>-</sup>                | 739.2763 | 0.8  | 723.2827 [M+H-H <sub>2</sub> O] <sup>+</sup> , 705.2745[M+H-2H <sub>2</sub> O] <sup>+</sup> , 505.1902 [M+H-C <sub>13</sub> H <sub>16</sub> O <sub>4</sub> ] <sup>+</sup> , 487.1755 [M+H-C <sub>13</sub> H <sub>16</sub> O <sub>4</sub> -H <sub>2</sub> O] <sup>+</sup> , 477.1955 [M+H-C <sub>13</sub> H <sub>16</sub> O <sub>4</sub> -CO] <sup>+</sup> , 469.1721 [M+H-C <sub>13</sub> H <sub>16</sub> O <sub>4</sub> -2H <sub>2</sub> O] <sup>+</sup> , 455.1549 [M+H-C <sub>13</sub> H <sub>16</sub> O <sub>4</sub> -2H <sub>2</sub> O-CH <sub>2</sub> ] <sup>+</sup> , 283.1037 C <sub>17</sub> H <sub>15</sub> O <sub>4</sub> , 271.0990 C <sub>16</sub> H <sub>15</sub> O <sub>4</sub> , 259.1006 C <sub>15</sub> H <sub>15</sub> O <sub>4</sub> , <b>247.0996</b> C <sub>14</sub> H <sub>15</sub> O <sub>4</sub> , 229.0877 C <sub>14</sub> H <sub>13</sub> O <sub>3</sub> , 219.1035 C <sub>13</sub> H <sub>15</sub> O <sub>3</sub> , 203.1056 C <sub>13</sub> H <sub>15</sub> O <sub>2</sub> , 189.0903 C <sub>12</sub> H <sub>13</sub> O <sub>2</sub> , 151.0771 C <sub>9</sub> H <sub>11</sub> O <sub>2</sub> | Viridissimaol E               | Lignans |  |
| 114                | 19.18 | C <sub>42</sub> H <sub>46</sub> O <sub>12</sub> | [M-H] <sup>-</sup>                | 741.2931 | 2.0  | <b>725.2980</b> [M+H-H <sub>2</sub> O] <sup>+</sup> , 711.2808 [M+H-H <sub>2</sub> O-CH <sub>2</sub> ] <sup>+</sup> , 707.2880 [M+H-2H <sub>2</sub> O] <sup>+</sup> , 693.2703 [M+H-2H <sub>2</sub> O-CH <sub>2</sub> ] <sup>+</sup> , 507.2048 [M+H-C <sub>13</sub> H <sub>16</sub> O <sub>4</sub> ] <sup>+</sup> , 489.1917 [M+H-C <sub>13</sub> H <sub>16</sub> O <sub>4</sub> -H <sub>2</sub> O] <sup>+</sup> , 313.1094 C <sub>18</sub> H <sub>17</sub> O <sub>5</sub> , 285.1142 C <sub>17</sub> H <sub>17</sub> O <sub>4</sub> , 271.0991 C <sub>16</sub> H <sub>15</sub> O <sub>4</sub> , 253.0884 C <sub>16</sub> H <sub>13</sub> O <sub>3</sub> , 177.0934 C <sub>11</sub> H <sub>13</sub> O <sub>2</sub> , 151.0782 C <sub>9</sub> H <sub>11</sub> O <sub>2</sub>                                                                                                                                                                                                                                                                                                                                               | Diarctigenin                  | Lignans |  |
| 115 <sup>n.a</sup> | 19.79 | C <sub>42</sub> H <sub>44</sub> O <sub>12</sub> | [M-H] <sup>-</sup>                | 739.2771 | 1.6  | <b>723.2832</b> [M+H-H <sub>2</sub> O] <sup>+</sup> , 705.2687 [M+H-2H <sub>2</sub> O] <sup>+</sup> , 589.2172 [M+H-C <sub>9</sub> H <sub>12</sub> O <sub>2</sub> ] <sup>+</sup> , 571.2095 [M+H-C <sub>9</sub> H <sub>12</sub> O <sub>2</sub> -H <sub>2</sub> O] <sup>+</sup> , 559.2019 [M+H-C <sub>9</sub> H <sub>12</sub> O <sub>2</sub> -H <sub>2</sub> O-C] <sup>+</sup> , 505.1884[M+H-C <sub>13</sub> H <sub>16</sub> O <sub>4</sub> ] <sup>+</sup> , 487.1982 [M+H-C <sub>13</sub> H <sub>16</sub> O <sub>4</sub> -H <sub>2</sub> O] <sup>+</sup> , 367.1272 [M+H-C <sub>21</sub> H <sub>26</sub> O <sub>6</sub> ] <sup>+</sup> , 247.0988 C <sub>14</sub> H <sub>15</sub> O <sub>4</sub> , 203.1028 C <sub>13</sub> H <sub>15</sub> O <sub>2</sub> , 151.0764 C <sub>9</sub> H <sub>11</sub> O <sub>2</sub>                                                                                                                                                                                                                                                                                                      | Diarctigenin/Neoarctin A-2H 1 | Lignans |  |

|                    |       |                                                 |                    |           |      |                                                                                                                                                                                                                                                                                                                                                                                                                                                                                                                                                                                                                                                                                                                                                                                                                                                                                                                                                                                                                                                                                                   |                                     |         |
|--------------------|-------|-------------------------------------------------|--------------------|-----------|------|---------------------------------------------------------------------------------------------------------------------------------------------------------------------------------------------------------------------------------------------------------------------------------------------------------------------------------------------------------------------------------------------------------------------------------------------------------------------------------------------------------------------------------------------------------------------------------------------------------------------------------------------------------------------------------------------------------------------------------------------------------------------------------------------------------------------------------------------------------------------------------------------------------------------------------------------------------------------------------------------------------------------------------------------------------------------------------------------------|-------------------------------------|---------|
| 116                | 19.86 | C <sub>42</sub> H <sub>46</sub> O <sub>12</sub> | [M-H] <sup>-</sup> | 741.2911  | 0.0  | 725.2981 [M+H-H <sub>2</sub> O] <sup>+</sup> , 711.2804 [M+H-H <sub>2</sub> O-CH <sub>2</sub> ] <sup>+</sup> , 707.2894 [M+H-2H <sub>2</sub> O] <sup>+</sup> , 693.2732 [M+H-2H <sub>2</sub> O-CH <sub>2</sub> ] <sup>+</sup> , 507.2048 [M+H-C <sub>13</sub> H <sub>16</sub> O <sub>4</sub> ] <sup>+</sup> , 489.1936 [M+H-C <sub>13</sub> H <sub>16</sub> O <sub>4</sub> -H <sub>2</sub> O] <sup>+</sup> , 387.1522 [M+H-C <sub>21</sub> H <sub>24</sub> O <sub>5</sub> ] <sup>+</sup> , 369.1373 [M+H-C <sub>21</sub> H <sub>26</sub> O <sub>6</sub> ] <sup>+</sup> , 351.1270 [M+H-C <sub>21</sub> H <sub>26</sub> O <sub>6</sub> -H <sub>2</sub> O] <sup>+</sup> , 285.1156 C <sub>17</sub> H <sub>17</sub> O <sub>4</sub> , 271.0983 C <sub>16</sub> H <sub>15</sub> O <sub>4</sub> , <b>247.0986</b> C <sub>14</sub> H <sub>15</sub> O <sub>4</sub> , 203.1054 C <sub>13</sub> H <sub>15</sub> O <sub>2</sub> , 189.0905 C <sub>12</sub> H <sub>13</sub> O <sub>2</sub> , 177.0917 C <sub>11</sub> H <sub>13</sub> O <sub>2</sub> , 151.0771 C <sub>9</sub> H <sub>11</sub> O <sub>2</sub> | Neoarctin A                         | Lignans |
| 117 <sup>n,a</sup> | 19.99 | C <sub>42</sub> H <sub>44</sub> O <sub>12</sub> | [M-H] <sup>-</sup> | 739.2772  | 1.7  | 723.2817 [M+H-H <sub>2</sub> O] <sup>+</sup> , 705.2703 [M+H-2H <sub>2</sub> O] <sup>+</sup> , 505.1875 [M+H-C <sub>13</sub> H <sub>16</sub> O <sub>4</sub> ] <sup>+</sup> , 495.1952[M+H-C <sub>14</sub> H <sub>14</sub> O <sub>4</sub> ] <sup>+</sup> , 487.1716 [M+H-C <sub>13</sub> H <sub>16</sub> O <sub>4</sub> -H <sub>2</sub> O] <sup>+</sup> , 477.1905 [M+H-C <sub>13</sub> H <sub>16</sub> O <sub>4</sub> -CO] <sup>+</sup> , 336.1324[M+H-C <sub>21</sub> H <sub>25</sub> O <sub>8</sub> ] <sup>+</sup> , <b>247.0978</b> C <sub>14</sub> H <sub>15</sub> O <sub>4</sub> , 203.1091 C <sub>13</sub> H <sub>15</sub> O <sub>2</sub> , 151.0745 C <sub>9</sub> H <sub>11</sub> O <sub>2</sub>                                                                                                                                                                                                                                                                                                                                                                                          | Diarctigenin/Neoarctin A-2H 2       | Lignans |
| 118 <sup>n,a</sup> | 20.07 | C <sub>42</sub> H <sub>44</sub> O <sub>12</sub> | [M-H] <sup>-</sup> | 739.2775  | 2.0  | 723.2791 [M+H-H <sub>2</sub> O] <sup>+</sup> , 705.2693 [M+H-2H <sub>2</sub> O] <sup>+</sup> , 505.1943 [M+H-C <sub>13</sub> H <sub>16</sub> O <sub>4</sub> ] <sup>+</sup> , 495.2081 [M+H-C <sub>14</sub> H <sub>14</sub> O <sub>4</sub> ] <sup>+</sup> , 487.1748 [M+H-C <sub>13</sub> H <sub>16</sub> O <sub>4</sub> -H <sub>2</sub> O] <sup>+</sup> , 477.1933 [M+H-C <sub>13</sub> H <sub>16</sub> O <sub>4</sub> -CO] <sup>+</sup> , 469.1742 [M+H-C <sub>13</sub> H <sub>16</sub> O <sub>4</sub> -2H <sub>2</sub> O] <sup>+</sup> , 283.0984 C <sub>17</sub> H <sub>15</sub> O <sub>4</sub> , 271.1070 C <sub>16</sub> H <sub>15</sub> O <sub>4</sub> , <b>247.0989</b> C <sub>14</sub> H <sub>15</sub> O <sub>4</sub> , 203.1091 C <sub>13</sub> H <sub>15</sub> O <sub>2</sub> , 151.0745 C <sub>9</sub> H <sub>11</sub> O <sub>2</sub>                                                                                                                                                                                                                                                  | Diarctigenin/Neoarctin A-2H 3       | Lignans |
| 119 <sup>n,a</sup> | 20.60 | C <sub>42</sub> H <sub>44</sub> O <sub>12</sub> | [M-H] <sup>-</sup> | 739.2784  | 2.9  | 723.2852 [M+H-H <sub>2</sub> O] <sup>+</sup> , 705.2712 [M+H-2H <sub>2</sub> O] <sup>+</sup> , 559.1881 [M+H-C <sub>10</sub> H <sub>14</sub> O <sub>3</sub> ] <sup>+</sup> , 505.1881 [M+H-C <sub>13</sub> H <sub>16</sub> O <sub>4</sub> ] <sup>+</sup> , 351.1277 [M+H-C <sub>21</sub> H <sub>26</sub> O <sub>7</sub> ] <sup>+</sup> , <b>247.1002</b> C <sub>14</sub> H <sub>15</sub> O <sub>4</sub> , 203.1028 C <sub>13</sub> H <sub>15</sub> O <sub>2</sub> , 151.0808 C <sub>9</sub> H <sub>11</sub> O <sub>2</sub>                                                                                                                                                                                                                                                                                                                                                                                                                                                                                                                                                                        | Diarctigenin/Neoarctin A-2H 4       | Lignans |
| 120 <sup>n,a</sup> | 20.79 | C <sub>63</sub> H <sub>66</sub> O <sub>18</sub> | [M-H] <sup>-</sup> | 1109.4159 | -1.2 | 893.3486 [M+H-C <sub>9</sub> H <sub>14</sub> O <sub>6</sub> ] <sup>+</sup> , 865.3491 [M+H-C <sub>9</sub> H <sub>14</sub> O <sub>6</sub> -CO] <sup>+</sup> , 741.2865 [M+H-C <sub>21</sub> H <sub>22</sub> O <sub>6</sub> ] <sup>+</sup> , 727.3124 [M+H-C <sub>21</sub> H <sub>20</sub> O <sub>7</sub> ] <sup>+</sup> , 709.2972 [M+H-C <sub>21</sub> H <sub>20</sub> O <sub>7</sub> -H <sub>2</sub> O] <sup>+</sup> , <b>247.1004</b> C <sub>14</sub> H <sub>15</sub> O <sub>4</sub> , 203.1090 C <sub>13</sub> H <sub>15</sub> O <sub>2</sub> , 151.0717 C <sub>9</sub> H <sub>11</sub> O <sub>2</sub>                                                                                                                                                                                                                                                                                                                                                                                                                                                                                         | Neoarctin A+7,8-didehydroarctigenin | Lignans |
| 121 <sup>n,a</sup> | 20.83 | C <sub>42</sub> H <sub>44</sub> O <sub>12</sub> | [M-H] <sup>-</sup> | 739.2723  | -3.2 | 723.2852 [M+H-H <sub>2</sub> O] <sup>+</sup> , <b>247.0995</b> C <sub>14</sub> H <sub>15</sub> O <sub>4</sub> , 203.1043 C <sub>13</sub> H <sub>15</sub> O <sub>2</sub> , 151.0728 C <sub>9</sub> H <sub>11</sub> O <sub>2</sub>                                                                                                                                                                                                                                                                                                                                                                                                                                                                                                                                                                                                                                                                                                                                                                                                                                                                  | Diarctigenin/Neoarctin A-2H 5       | Lignans |
| 122 <sup>n,a</sup> | 21.02 | C <sub>63</sub> H <sub>68</sub> O <sub>18</sub> | [M+H] <sup>+</sup> | 1113.4509 | 2.5  | 1095.4423 [M+H-H <sub>2</sub> O] <sup>+</sup> , 1081.4221 [M+H-H <sub>2</sub> O-CH <sub>2</sub> ] <sup>+</sup> , <b>727.3146</b> [M+H-C <sub>21</sub> H <sub>22</sub> O <sub>6</sub> -O] <sup>+</sup> , 709.3037 [M+H-C <sub>21</sub> H <sub>22</sub> O <sub>7</sub> -H <sub>2</sub> O] <sup>+</sup> , 691.2857 [M+H-C <sub>21</sub> H <sub>22</sub> O <sub>7</sub> -2H <sub>2</sub> O] <sup>+</sup> , 491.2132 [M+H-C <sub>34</sub> H <sub>38</sub> O <sub>11</sub> ] <sup>+</sup> , 473.1907 [M+H-C <sub>34</sub> H <sub>38</sub> O <sub>11</sub> -H <sub>2</sub> O] <sup>+</sup> , 247.0997 C <sub>14</sub> H <sub>15</sub> O <sub>4</sub> , 151.0720 C <sub>9</sub> H <sub>11</sub> O <sub>2</sub>                                                                                                                                                                                                                                                                                                                                                                                            | Diarctigenin+arctigenin             | Lignans |
| 123 <sup>n,a</sup> | 21.81 | C <sub>63</sub> H <sub>68</sub> O <sub>18</sub> | [M+H] <sup>+</sup> | 1113.4509 | 2.5  | 1095.4404 [M+H-H <sub>2</sub> O] <sup>+</sup> , 1081.4243 [M+H-H <sub>2</sub> O-CH <sub>2</sub> ] <sup>+</sup> , <b>727.3138</b> [M+H-C <sub>21</sub> H <sub>22</sub> O <sub>6</sub> -O] <sup>+</sup> , 709.3027 [M+H-C <sub>21</sub> H <sub>22</sub> O <sub>7</sub> -H <sub>2</sub> O] <sup>+</sup> , 691.2892 [M+H-C <sub>21</sub> H <sub>22</sub> O <sub>7</sub> -2H <sub>2</sub> O] <sup>+</sup> , 491.2039 [M+H-C <sub>34</sub> H <sub>38</sub> O <sub>11</sub> ] <sup>+</sup> , 247.0991 C <sub>14</sub> H <sub>15</sub> O <sub>4</sub> , 203.1071 C <sub>13</sub> H <sub>15</sub> O <sub>2</sub> , 151.0746 C <sub>9</sub> H <sub>11</sub> O <sub>2</sub>                                                                                                                                                                                                                                                                                                                                                                                                                                  | NeoarctinA+arctigenin               | Lignans |

Notes: CA, caffeoylquinic acids;quinicacid:QA;Glucopyranosyl, Glc; Dapiofuranosyl, Dapi; galactopyranosyl, Gal; gentiobiosyl, Gen; apiofuranosyl, Api;<sup>n</sup>-Nontarget compounds; <sup>a</sup>-potential novel compounds; \*-unambitiously identified by comparison with reference standards.
